# Supplementary material for: Design and synthesis of novel cathepsin C inhibitors with anti-inflammatory activity
Source: Royal Society of Chemistry journal article supplement (doi:10.1039/d4md00730a), 2024-12-03

# Supporting Information

## For

### Development, Creation and Assessment of Novel Cathepsin C Inhibitors with Anti-inflammatory Properties

Xiaobao Shen<sup>a</sup>, Nan Li<sup>a</sup>, Miao Liu<sup>a</sup>, Xuanzheng Han<sup>a</sup>, Xinyu Zhang, Yazhi Wang,  
Jingwen Jia, Fufang Wu<sup>\*,a</sup>, Hongwei Chen<sup>\*,a</sup> and Xinhua Liu<sup>\*,b</sup>

<sup>a</sup> Medical School, Fuyang Normal University, Fuyang, 236037, China

<sup>b</sup> School of Pharmacy, Anhui Medical University, Hefei, 230032, China

\*Email: wff03609344@126.com; chen790514@126.com; xhliuhx@163.com

## Table of Contents

|                                                                   |     |
|-------------------------------------------------------------------|-----|
| 1. Chemistry Methods.....                                         | S3  |
| 2. General procedure of reactions.....                            | S3  |
| 3. Characterization of products.....                              | S5  |
| 4. <sup>1</sup> H NMR, <sup>13</sup> C NMR spectra and HRMS ..... | S24 |

## 1. Chemistry Methods

General Information: Unless specified otherwise, all reactions were conducted in a pressure-resistant tube which was heated on a magnetic stirrer. The reagents and solvents used were obtained from commercial suppliers without further purification. NMR spectra (H, C, F) were measured using a Bruker Ascend 400 spectrometer and reported as chemical shifts in parts per million from residual solvent as an internal standard in CDCl<sub>3</sub>, and coupling constant (J, hertz). High-resolution mass spectra (HR MS) were recorded on a Waters UPLC G2-Xs Qtof instrument.

## 2. General procedure of reactions

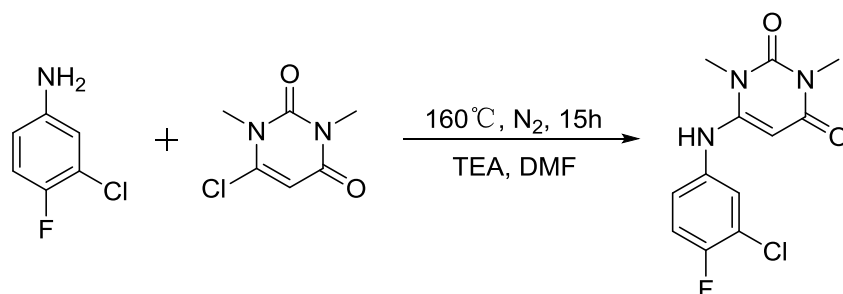

Add 6-chloro-1,3-dimethyluracil (1 mmol, 0.2 g), 3-chloro-4-fluoroaniline (2 mmol, 0.3 g), triethylamine (1.5 mmol, 0.2 mL), and DMF (5 mL) to the Schlenk tube and react for 15 hours under nitrogen protection at 160 °C. The reaction mixture was then purified by column chromatography to yield the corresponding product **a** as yellow solid in 86% yield. (30:1 to 3:1 petroleum ether/ethyl acetate); mp 173-176 °C. <sup>1</sup>H NMR (400 MHz, CDCl<sub>3</sub>) δ 7.23 (dd, *J* = 6.4, 2.4 Hz, 1H), 7.14 (t, *J* = 8.4 Hz, 1H), 7.10 – 6.97 (m, 1H), 4.85 (s, 1H), 3.53 (s, 3H), 3.28 (s, 3H); <sup>13</sup>C{<sup>1</sup>H} NMR (101 MHz, CDCl<sub>3</sub>) δ 159.7, 157.2, 156.6, 152.2, 147.8, 130.3 (d, *J* = 4.04 Hz), 129.3, 127.0 (d, *J* = 7.07 Hz), 118.3 (d, *J* = 23.23 Hz), 92.4, 35.7, 32.9.

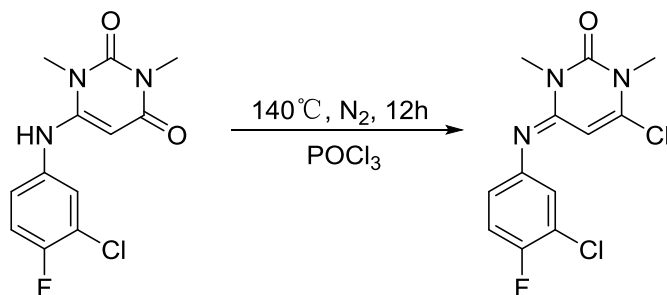

Add 6-(3-chloro-4-fluoroaniline)-1,3-dimethyl-2,4(1H,3H)-pyrimidinone (1 mmol, 0.3 g) and POCl<sub>3</sub> (3 mL) to the Schlenk tube and react for 12 hours under nitrogen protection at 140 °C. The resulting solution was then dried by spinning, quenched with 1N ammonia water, and extracted three times with dichloromethane. The residue was subsequently purified by column chromatography to yield the corresponding product **b** as yellow solid with a ratio of 20:1-7:1 petroleum ether/ethyl acetate in 95% yield. mp 79-82 °C. <sup>1</sup>H NMR (400 MHz, CDCl<sub>3</sub>) δ 7.07 (t, *J* = 8.8 Hz, 1H), 6.83 (dd, *J* = 6.8, 2.8 Hz, 1H), 6.63 (ddd, *J* = 8.8, 4.0, 2.8 Hz, 1H), 5.67 (s, 1H), 3.50 (s, 3H), 3.43 (s, 3H); <sup>13</sup>C{<sup>1</sup>H} NMR (101 MHz, CDCl<sub>3</sub>) δ 155.6, 153.2, 151.1, 149.4, 145.9 (d, *J* = 3.03 Hz), 142.4, 123.4, 121.2 (q, *J* = 6.06 Hz), 117.0 (d, *J* = 21.21 Hz), 94.9, 33.3, 29.9.

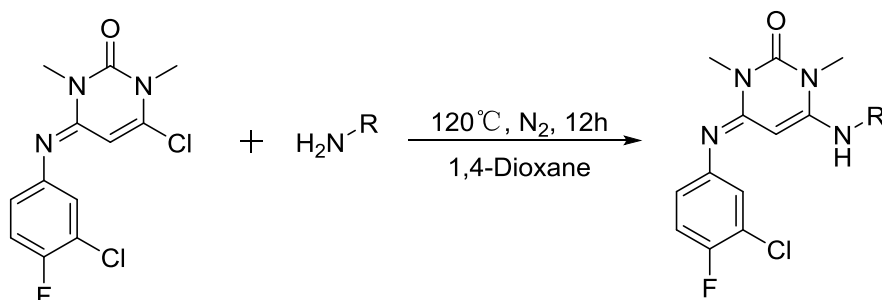

Add (E) -6-chloro-4- ((3-chloro-4-fluorophenyl) imino) -1,3-dimethyl-3,4-dihydropyrimidin-2 (1H) - one (1 mmol), amine compounds (2 mmol), and 1,4-dioxane (2.5 mL) to the Schlenk tube, and react for 12 hours under nitrogen protection. The reaction mixture was then purified by column chromatography to yield the corresponding product **1-36** (30:1 to 1:5 petroleum ether/ethyl acetate).



### 3. Characterization of products

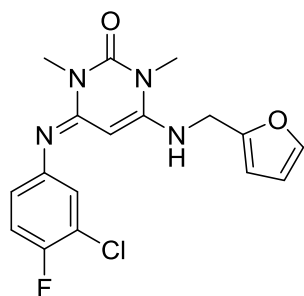

#### 4.1.3.1-1

**(E)-4-((3-chloro-4-fluorophenyl)imino)-6-((furan-2-ylmethyl)amino)-1,3-dimethyl-3,4-dihydropyrimidin-2(1H)-one (1).** Product **1** was synthesized according to general experimental procedure III and purified by column chromatography (petroleum ether : ethyl acetate = 20 : 1-1 : 5). yellow liquid (326 mg, 0.90 mmol, 90% yield).  $^1\text{H}$  NMR (400 MHz,  $\text{CDCl}_3$ )  $\delta$  7.04 (t,  $J$  = 8.8 Hz, 1H), 6.83 (dd,  $J$  = 6.8, 2.8 Hz, 1H), 6.64 (ddd,  $J$  = 8.8, 4.4, 2.4 Hz, 1H), 6.33 (dd,  $J$  = 3.2, 2.0 Hz, 1H), 6.07 (d,  $J$  = 3.2 Hz, 1H), 4.76 (s, 2H), 4.59 (s, 1H), 4.07 (d,  $J$  = 4.8 Hz, 2H), 3.41 (s, 3H), 3.36 (s, 3H);  $^{13}\text{C}\{^1\text{H}\}$  NMR (101 MHz,  $\text{CDCl}_3$ )  $\delta$  154.9, 152.5, 152.4 (d,  $J$  = 2.02 Hz), 151.7, 149.4 (d,  $J$  = 15.15 Hz), 148.0 (d,  $J$  = 3.03 Hz), 142.7, 124.0, 122.0 (d,  $J$  = 6.06 Hz), 120.6 (d,  $J$  = 19.19 Hz), 116.7 (d,  $J$  = 21.21 Hz), 110.6, 108.8, 70.3, 40.0, 29.4, 28.5;  $^{19}\text{F}$  NMR (376 MHz,  $\text{CDCl}_3$ )  $\delta$  -125.6; HRMS (ESI)  $m/z$   $[\text{M}+\text{H}]^+$  calcd for  $\text{C}_{17}\text{H}_{17}\text{ClFN}_4\text{O}_2^+$ : 363.1019; found: 363.1007.

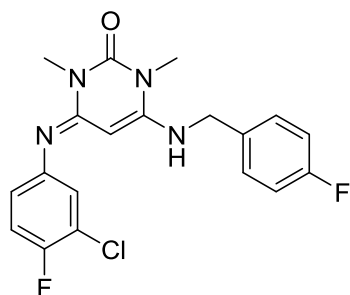

#### 4.1.3.1-2

**(E)-4-((3-chloro-4-fluorophenyl)imino)-6-((4-fluorobenzyl)amino)-1,3-dimethyl-3,4-dihydropyrimidin-2(1H)-one (2).** Product **2** was synthesized according to general experimental procedure III and purified by column chromatography (petroleum ether : ethyl acetate= 20 : 1-1 : 5). yellow liquid (336 mg, 0.86 mmol, 86% yield).  $^1\text{H}$  NMR (400 MHz,  $\text{CDCl}_3$ )  $\delta$  7.19 – 7.11 (m, 2H), 7.07 – 6.94 (m, 3H), 6.78 (dd,  $J = 6.8, 2.8$  Hz, 1H), 6.55 (ddd,  $J = 8.4, 4.0, 2.4$  Hz, 1H), 4.48 (s, 1H), 4.05 (s, 2H), 3.42 (s, 3H), 3.38 (s, 3H);  $^{13}\text{C}\{^1\text{H}\}$  NMR (101 MHz,  $\text{CDCl}_3$ )  $\delta$  163.7, 161.2, 154.9, 152.5, 152.2 (d,  $J = 1.01$  Hz), 151.7, 149.3, 147.8 (d,  $J = 3.03$  Hz), 131.8 (d,  $J = 3.03$  Hz), 129.3 (d,  $J = 8.08$  Hz), 123.9, 121.7 (d,  $J = 6.06$  Hz), 120.7 (d,  $J = 18.18$  Hz), 116.7 (d,  $J = 21.21$  Hz), 116.0 (d,  $J = 21.21$  Hz), 70.9, 46.7, 29.5, 28.4;  $^{19}\text{F}$  NMR (376 MHz,  $\text{CDCl}_3$ )  $\delta$  -113.4, -125.5; HRMS (ESI)  $m/z$   $[\text{M}+\text{H}]^+$  calcd for  $\text{C}_{19}\text{H}_{18}\text{ClF}_2\text{N}_4\text{O}^+$ : 391.1132; found: 391.1133.

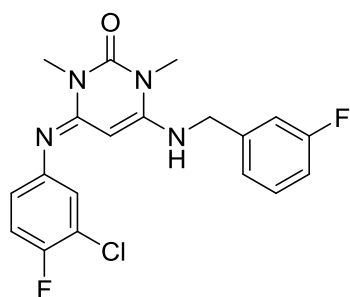

#### 4.1.3.1-3

**(E)-4-((3-chloro-4-fluorophenyl)imino)-6-((3-fluorobenzyl)amino)-1,3-dimethyl-3,4-dihydropyrimidin-2(1H)-one (3).** Product **3** was synthesized according to general experimental procedure III and purified by column chromatography (petroleum ether : ethyl acetate= 20 : 1-1 : 5). yellow liquid (348 mg, 0.89 mmol, 89% yield).  $^1\text{H}$  NMR (400 MHz,  $\text{CDCl}_3$ )  $\delta$  7.30 (td,  $J = 8.0, 6.0$  Hz, 1H), 7.08 – 6.85 (m, 4H), 6.76 (dd,  $J = 6.8, 2.8$  Hz, 1H), 6.50 (ddd,  $J = 8.8, 4.4, 2.4$  Hz, 1H), 4.45 (s, 1H), 4.09 (s, 2H), 3.41 (d,  $J = 5.2$  Hz, 6H);  $^{13}\text{C}\{^1\text{H}\}$  NMR (101 MHz,  $\text{CDCl}_3$ )  $\delta$  164.3, 161.8, 154.9, 152.5, 152.2 (d,  $J = 1.01$  Hz), 151.7, 149.3, 147.7 (d,  $J = 3.03$  Hz), 138.7 (d,  $J = 7.07$  Hz), 130.6 (d,  $J = 9.09$  Hz), 124.0, 123.0 (d,  $J = 3.03$  Hz), 121.6 (d,  $J = 7.07$  Hz), 120.7 (d,  $J = 18.18$  Hz), 116.6 (d,  $J = 21.21$  Hz), 115.1 (d,  $J = 21.21$  Hz), 114.3 (d,  $J = 22.22$  Hz), 71.1, 46.8 (d,  $J = 2.02$  Hz), 29.5, 28.5;  $^{19}\text{F}$  NMR (376 MHz,  $\text{CDCl}_3$ )  $\delta$  -111.8, -125.5; HRMS (ESI)  $m/z$   $[\text{M}+\text{H}]^+$  calcd for  $\text{C}_{19}\text{H}_{18}\text{ClF}_2\text{N}_4\text{O}^+$ : 391.1132; found: 391.1137.

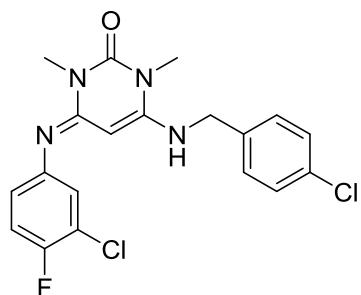

#### 4.1.3.1-4

**(E)-4-((3-chloro-4-fluorophenyl)imino)-6-((4-chlorobenzyl)amino)-1,3-dimethyl-3,4-dihydropyrimidin-2(1H)-one (4).** Product **4** was synthesized according to general experimental procedure III and purified by column chromatography (petroleum ether : ethyl acetate= 20 : 1-1 : 5). yellow liquid (374 mg, 0.92 mmol, 92% yield).  $^1\text{H}$  NMR (400 MHz,  $\text{CDCl}_3$ )  $\delta$  7.38 – 7.29 (m, 2H), 7.15 – 7.06 (m, 2H), 6.99 (t,  $J$  = 8.8 Hz, 1H), 6.78 (dd,  $J$  = 6.8, 2.4 Hz, 1H), 6.61 – 6.45 (m, 1H), 4.46 (s, 1H), 4.06 (s, 2H), 3.41 (d,  $J$  = 14.4 Hz, 6H);  $^{13}\text{C}\{^1\text{H}\}$  NMR (101 MHz,  $\text{CDCl}_3$ )  $\delta$  155.0, 152.6, 152.2, 151.6, 149.4, 147.6 (d,  $J$  = 4.04 Hz), 134.5, 134.1, 129.0 (d,  $J$  = 42.42 Hz), 124.0, 121.7 (d,  $J$  = 7.07 Hz), 120.7 (d,  $J$  = 19.19 Hz), 116.7 (d,  $J$  = 21.21 Hz), 71.0, 46.8, 29.5, 28.5;  $^{19}\text{F}$  NMR (376 MHz,  $\text{CDCl}_3$ )  $\delta$  -125.3; HRMS (ESI)  $m/z$   $[\text{M}+\text{H}]^+$  calcd for  $\text{C}_{19}\text{H}_{18}\text{Cl}_2\text{FN}_4\text{O}^+$ : 407.0836; found: 407.0827.

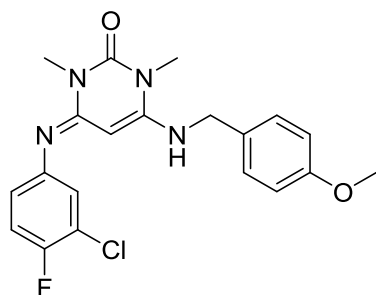

#### 4.1.3.1-5

**(E)-4-((3-chloro-4-fluorophenyl)imino)-6-((4-methoxybenzyl)amino)-1,3-dimethyl-3,4-dihydropyrimidin-2(1H)-one (5).** Product **5** was synthesized according to general experimental procedure III and purified by column chromatography (petroleum ether : ethyl acetate= 20 : 1-1 : 5). yellow liquid (342 mg, 0.85 mmol, 85% yield).  $^1\text{H}$  NMR (400 MHz,  $\text{CDCl}_3$ )  $\delta$  7.09 (d,  $J$  = 7.2 Hz, 2H), 7.00 (td,  $J$  = 8.8, 1.6 Hz, 1H), 6.90 – 6.78 (m, 3H), 6.64 – 6.54 (m, 1H), 4.53 (d,  $J$  = 1.2 Hz, 1H), 3.99 (s, 2H), 3.81 (d,  $J$  = 1.6 Hz, 3H), 3.39 (dd,  $J$  = 28.0, 1.6 Hz, 6H);  $^{13}\text{C}\{^1\text{H}\}$  NMR (101 MHz,  $\text{CDCl}_3$ )  $\delta$  159.5, 154.9, 152.5, 152.4 (d,  $J$  = 1.01 Hz), 151.7, 149.5, 148.0 (d,  $J$  = 3.03 Hz), 129.1, 128.0, 124.0, 121.8 (d,  $J$  = 7.07 Hz), 120.7 (d,  $J$  = 18.18 Hz), 116.7 (d,  $J$  = 21.21 Hz), 114.3, 70.5, 55.3, 46.9, 29.4, 28.4;  $^{19}\text{F}$  NMR (376 MHz,  $\text{CDCl}_3$ )  $\delta$  -125.6; HRMS (ESI)  $m/z$   $[\text{M}+\text{H}]^+$  calcd for  $\text{C}_{20}\text{H}_{21}\text{ClFN}_4\text{O}_2^+$ : 403.1332; found:

403.1332.

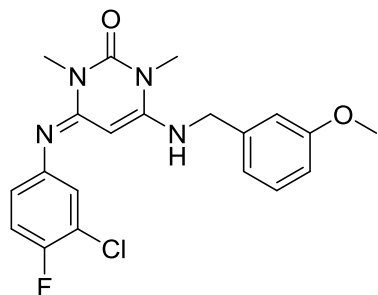

#### 4.1.3.1-6

**(E)-4-((3-chloro-4-fluorophenyl)imino)-6-((3-methoxybenzyl)amino)-1,3-dimethyl-3,4-dihydropyrimidin-2(1H)-one (6).** Product **6** was synthesized according to general experimental procedure III and purified by column chromatography (petroleum ether : ethyl acetate= 20 : 1-1 : 5). yellow liquid (358 mg, 0.89 mmol, 89% yield).  $^1\text{H}$  NMR (400 MHz,  $\text{CDCl}_3$ )  $\delta$  7.29 – 7.23 (m, 1H), 6.97 (t,  $J$  = 8.8 Hz, 1H), 6.85 (dd,  $J$  = 8.4, 2.4 Hz, 1H), 6.80 (dd,  $J$  = 6.8, 2.4 Hz, 1H), 6.77 – 6.70 (m, 2H), 6.54 (ddd,  $J$  = 8.8, 4.4, 2.4 Hz, 1H), 4.50 (s, 1H), 4.05 (s, 2H), 3.79 (s, 3H), 3.40 (d,  $J$  = 16.0 Hz, 6H);  $^{13}\text{C}\{^1\text{H}\}$  NMR (101 MHz,  $\text{CDCl}_3$ )  $\delta$  160.0, 154.9, 152.5, 152.4 (d,  $J$  = 1.01 Hz), 151.7, 149.5, 147.7 (d,  $J$  = 2.02 Hz), 137.7, 130.1, 124.1, 121.7 (d,  $J$  = 6.06 Hz), 120.7 (d,  $J$  = 18.18 Hz), 119.6, 116.6 (d,  $J$  = 22.22 Hz), 113.3 (d,  $J$  = 18.18 Hz), 70.8, 55.2, 47.4, 29.5, 28.5;  $^{19}\text{F}$  NMR (376 MHz,  $\text{CDCl}_3$ )  $\delta$  -125.6; HRMS (ESI)  $m/z$   $[\text{M}+\text{H}]^+$  calcd for  $\text{C}_{20}\text{H}_{21}\text{ClFN}_4\text{O}_2^+$ : 403.1332; found: 403.1340.

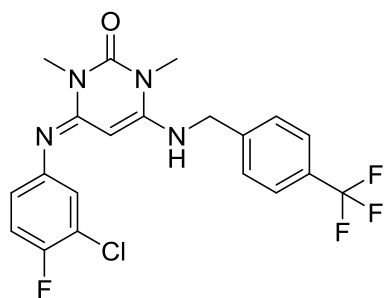

#### 4.1.3.1-7

**(E)-4-((3-chloro-4-fluorophenyl)imino)-1,3-dimethyl-6-((4-(trifluoromethyl)benzyl)amino)-3,4-dihydropyrimidin-2(1H)-one (7).** Product **7** was synthesized according to general experimental procedure III and purified by column chromatography (petroleum ether : ethyl acetate= 20 : 1-1 : 5). yellow liquid

(378 mg, 0.86 mmol, 86% yield).  $^1\text{H}$  NMR (400 MHz,  $\text{CDCl}_3$ )  $\delta$  7.60 (d,  $J = 8.0$  Hz, 2H), 7.33 – 7.21 (m, 2H), 6.93 (t,  $J = 8.8$  Hz, 1H), 6.72 (dd,  $J = 6.8, 2.4$  Hz, 1H), 6.46 (ddd,  $J = 8.8, 4.0, 2.4$  Hz, 1H), 4.40 (s, 1H), 4.17 (s, 2H), 3.41 (s, 6H);  $^{13}\text{C}\{^1\text{H}\}$  NMR (101 MHz,  $\text{CDCl}_3$ )  $\delta$  154.9, 152.5, 152.0 (d,  $J = 2.02$  Hz), 151.6, 149.3, 147.7 (d,  $J = 3.03$  Hz), 140.2, 130.4 (d,  $J = 32.32$  Hz), 127.6, 126.0 (d,  $J = 4.04$  Hz), 123.9, 121.6 (d,  $J = 6.06$  Hz), 120.7 (d,  $J = 18.18$  Hz), 116.6 (d,  $J = 21.21$  Hz), 71.3, 46.8, 29.5, 28.5;  $^{19}\text{F}$  NMR (376 MHz,  $\text{CDCl}_3$ )  $\delta$  -62.6; HRMS (ESI)  $m/z$   $[\text{M}+\text{H}]^+$  calcd for  $\text{C}_{20}\text{H}_{18}\text{ClF}_4\text{N}_4\text{O}^+$ : 441.1100; found: 441.1106.

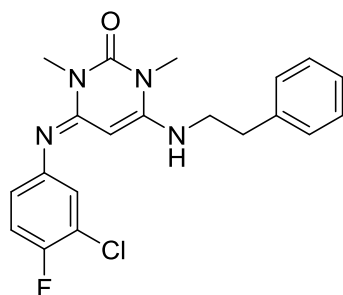

#### 4.1.3.1-8

**(E)-4-((3-chloro-4-fluorophenyl)imino)-1,3-dimethyl-6-(phenethylamino)-3,4-dihydropyrimidin-2(1H)-one (8).** Product **8** was synthesized according to general experimental procedure III and purified by column chromatography (petroleum ether : ethyl acetate = 20 : 1-1 : 5). yellow liquid (351 mg, 0.91 mmol, 91% yield).  $^1\text{H}$  NMR (400 MHz,  $\text{CDCl}_3$ )  $\delta$  7.36 – 7.29 (m, 2H), 7.29 – 7.24 (m, 1H), 7.16 – 7.00 (m, 3H), 6.90 (dd,  $J = 6.4, 2.4$  Hz, 1H), 6.69 (ddd,  $J = 8.8, 4.4, 2.8$  Hz, 1H), 4.53 (s, 1H), 3.44 (s, 3H), 3.21 (s, 3H), 3.19 – 3.09 (m, 2H), 2.84 (t,  $J = 6.8$  Hz, 2H);  $^{13}\text{C}\{^1\text{H}\}$  NMR (101 MHz,  $\text{CDCl}_3$ )  $\delta$  154.9, 152.5, 152.4 (d,  $J = 1.01$  Hz), 151.7, 149.6, 148.1 (d,  $J = 3.03$  Hz), 137.5, 128.8 (d,  $J = 50.5$  Hz), 127.2, 124.0, 121.8 (d,  $J = 7.07$  Hz), 120.8 (d,  $J = 2.02$  Hz), 116.8 (d,  $J = 22.22$  Hz), 69.6, 43.9, 34.3, 29.4, 28.1;  $^{19}\text{F}$  NMR (376 MHz,  $\text{CDCl}_3$ )  $\delta$  -125.6; HRMS (ESI)  $m/z$   $[\text{M}+\text{H}]^+$  calcd for  $\text{C}_{20}\text{H}_{21}\text{ClFN}_4\text{O}^+$ : 387.1382; found: 387.1372.

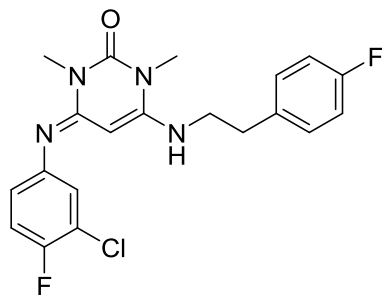

#### 4.1.3.1-9

**(E)-4-((3-chloro-4-fluorophenyl)imino)-6-((4-fluorophenethyl)amino)-1,3-dimethyl-3,4-dihydropyrimidin-2(1H)-one (9).** Product **9** was synthesized according to general experimental procedure III and purified by column chromatography (petroleum ether : ethyl acetate= 20 : 1-1 : 5). yellow liquid (364 mg, 0.90 mmol, 90% yield).  $^1\text{H}$  NMR (400 MHz,  $\text{CDCl}_3$ )  $\delta$  7.10 – 6.96 (m, 5H), 6.90 (dd,  $J$  = 6.8, 2.4 Hz, 1H), 6.73 – 6.64 (m, 1H), 4.52 (s, 1H), 3.43 (s, 3H), 3.24 (s, 3H), 3.13 (s, 2H), 2.81 (t,  $J$  = 6.8 Hz, 2H);  $^{13}\text{C}\{^1\text{H}\}$  NMR (101 MHz,  $\text{CDCl}_3$ )  $\delta$  163.1, 160.7, 154.9, 152.5, 152.4 (d,  $J$  = 1.01 Hz), 151.7, 149.5, 148.1 (d,  $J$  = 3.03 Hz), 133.2 (d,  $J$  = 3.03 Hz), 130.0 (d,  $J$  = 8.08 Hz), 124.0, 121.9 (d,  $J$  = 7.07 Hz), 120.8 (d,  $J$  = 18.18 Hz), 116.8 (d,  $J$  = 21.21 Hz), 115.9 (d,  $J$  = 21.21 Hz) 69.6, 44.0, 33.5, 29.5, 28.2;  $^{19}\text{F}$  NMR (376 MHz,  $\text{CDCl}_3$ )  $\delta$  -115.3, -125.5; HRMS (ESI)  $m/z$   $[\text{M}+\text{H}]^+$  calcd for  $\text{C}_{20}\text{H}_{20}\text{ClF}_2\text{N}_4\text{O}^+$ : 405.1288; found: 405.1296.

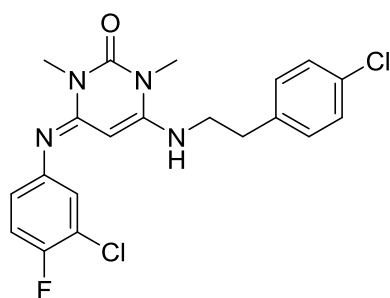

#### 4.1.3.1-10

**(E)-4-((3-chloro-4-fluorophenyl)imino)-6-((4-chlorophenethyl)amino)-1,3-dimethyl-3,4-dihydropyrimidin-2(1H)-one (10).** Product **10** was synthesized according to general experimental procedure III and purified by column chromatography (petroleum ether : ethyl acetate= 20 : 1-1 : 5). yellow liquid (386 mg, 0.92 mmol, 92% yield).  $^1\text{H}$  NMR (400 MHz,  $\text{CDCl}_3$ )  $\delta$  7.28 (d,  $J$  = 8.4 Hz, 2H), 7.09 – 6.96 (m, 3H), 6.89 (dd,  $J$  = 6.8, 2.4 Hz, 1H), 6.73 – 6.64 (m, 1H), 4.51 (s, 1H), 3.43 (s, 3H), 3.24 (s, 3H),

3.13 (s, 2H), 2.80 (t,  $J = 6.8$  Hz, 2H);  $^{13}\text{C}\{^1\text{H}\}$  NMR (101 MHz,  $\text{CDCl}_3$ )  $\delta$  154.9, 152.5, 152.4, 151.7, 149.5, 148.1 (d,  $J = 4.04$  Hz) 136.0, 133.0, 129.5 (d,  $J = 74.74$  Hz), 124.0, 121.9 (d,  $J = 6.06$  Hz), 120.8 (d,  $J = 18.18$  Hz), 116.8 (d,  $J = 22.22$  Hz), 69.7, 43.9, 33.7, 29.5, 28.2;  $^{19}\text{F}$  NMR (376 MHz,  $\text{CDCl}_3$ )  $\delta$  -125.5; HRMS (ESI)  $m/z$   $[\text{M}+\text{H}]^+$  calcd for  $\text{C}_{20}\text{H}_{20}\text{Cl}_2\text{FN}_4\text{O}^+$ : 421.0993; found: 421.0983.

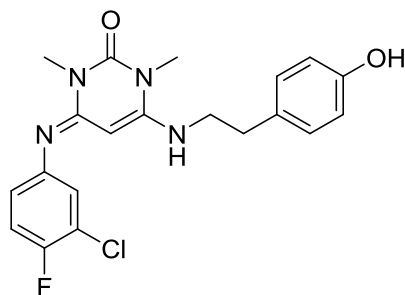

#### 4.1.3.1-11

**(E)-4-((3-chloro-4-fluorophenyl)imino)-6-((4-hydroxyphenethyl)amino)-1,3-dimethyl-3,4-dihydropyrimidin-2(1H)-one (11).** Product **11** was synthesized according to general experimental procedure III and purified by column chromatography (petroleum ether : ethyl acetate= 20 : 1-1 : 5). yellow liquid (354 mg, 0.88 mmol, 88% yield).  $^1\text{H}$  NMR (400 MHz, Acetone- $d_6$ )  $\delta$  7.15 (t,  $J = 8.8$  Hz, 1H), 6.89 (d,  $J = 6.8$  Hz, 1H), 6.83 (d,  $J = 8.0$  Hz, 2H), 6.78 – 6.71 (m, 1H), 6.69 (d,  $J = 8.0$  Hz, 2H), 4.54 (s, 1H), 3.32 (d,  $J = 10.8$  Hz, 6H), 3.12 – 3.04 (m, 2H), 2.71 – 2.61 (m, 2H);  $^{13}\text{C}\{^1\text{H}\}$  NMR (101 MHz, Acetone- $d_6$ )  $\delta$  156.0, 154.3, 152.7, 151.9, 151.4, 150.6, 149.4 (d,  $J = 3.03$  Hz), 129.6, 129.3, 123.8, 122.4 (d,  $J = 7.07$  Hz), 119.9 (d,  $J = 19.19$  Hz), 116.8 (d,  $J = 21.21$  Hz), 115.3, 67.9, 44.8, 33.2, 28.6, 28.2;  $^{19}\text{F}$  NMR (376 MHz, Acetone- $d_6$ )  $\delta$  -127.9; HRMS (ESI)  $m/z$   $[\text{M}+\text{H}]^+$  calcd for  $\text{C}_{20}\text{H}_{21}\text{ClFN}_4\text{O}_2^+$ : 403.1332; found:403.1320.

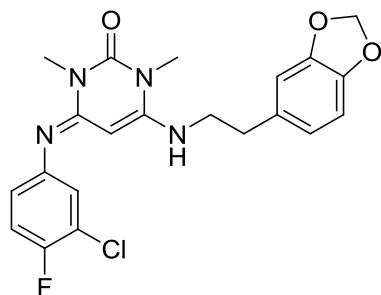

#### 4.1.3.1-12

**(E)-6-((2-(benzo[d][1,3]dioxol-5-yl)ethyl)amino)-4-((3-chloro-4-fluorophenyl)imino)-1,3-dimethyl-**

**3,4-dihydropyrimidin-2(1H)-one (12).** Product **12** was synthesized according to general experimental procedure III and purified by column chromatography (petroleum ether : ethyl acetate= 20 : 1-1 : 5). yellow liquid (383 mg, 0.89 mmol, 89% yield). <sup>1</sup>H NMR (400 MHz, CDCl<sub>3</sub>) δ 7.06 (t, *J* = 9.2 Hz, 1H), 6.89 (dd, *J* = 6.8, 2.8 Hz, 1H), 6.75 (d, *J* = 8.0 Hz, 1H), 6.72 – 6.66 (m, 1H), 6.59 (d, *J* = 1.6 Hz, 1H), 6.53 (dd, *J* = 7.6, 1.6 Hz, 1H), 5.95 (s, 2H), 4.50 (s, 1H), 3.43 (s, 3H), 3.23 (s, 3H), 3.09 (t, *J* = 6.8 Hz, 2H), 2.76 (t, *J* = 6.8 Hz, 2H); <sup>13</sup>C{<sup>1</sup>H} NMR (101 MHz, CDCl<sub>3</sub>) δ 155.0, 152.5, 152.4 (d, *J* = 1.01 Hz), 151.7, 149.6, 148.3, 148.0 (d, *J* = 3.03 Hz), 146.7, 131.1, 124.0, 121.8 (d, *J* = 6.06 Hz), 121.5, 120.8 (d, *J* = 19.19 Hz), 116.8 (d, *J* = 21.21 Hz), 108.6 (d, *J* = 9.09 Hz), 101.2, 69.6, 44.0, 34.0, 29.5, 28.1; <sup>19</sup>F NMR (376 MHz, CDCl<sub>3</sub>) δ -125.5; HRMS (ESI) *m/z* [M+H]<sup>+</sup> calcd for C<sub>21</sub>H<sub>21</sub>ClFN<sub>4</sub>O<sub>3</sub><sup>+</sup>: 431.1281; found:431.1289.

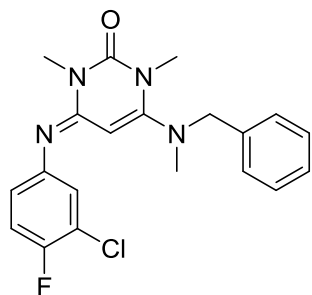

#### 4.1.3.1-13

**(E)-6-(benzyl(methyl)amino)-4-((3-chloro-4-fluorophenyl)imino)-1,3-dimethyl-3,4-dihydropyrimidin-2(1H)-one (13).** Product **13** was synthesized according to general experimental procedure III and purified by column chromatography (petroleum ether : ethyl acetate= 20 : 1-1 : 5). yellow liquid (336 mg, 0.87 mmol, 87% yield). <sup>1</sup>H NMR (400 MHz, CDCl<sub>3</sub>) δ 7.39 – 7.27 (m, 3H), 7.23 – 7.14 (m, 2H), 7.03 (t, *J* = 8.8 Hz, 1H), 6.82 (dd, *J* = 6.8, 2.4 Hz, 1H), 6.63 – 6.55 (m, 1H), 4.90 (s, 1H), 3.95 (s, 2H), 3.42 (d, *J* = 5.6 Hz, 6H), 2.51 (s, 3H); <sup>13</sup>C{<sup>1</sup>H} NMR (101 MHz, CDCl<sub>3</sub>) δ 156.1, 155.2, 153.1, 152.7, 151.7 (d, *J* = 1.01 Hz), 147.1 (d, *J* = 3.03 Hz), 135.6, 128.4 (d, *J* = 76.76 Hz), 127.9, 123.8, 121.6 (d, *J* = 6.06 Hz), 120.8 (d, *J* = 19.19 Hz), 116.7 (d, *J* = 21.21 Hz), 82.5, 57.7, 39.9, 32.6, 29.4; <sup>19</sup>F NMR (376 MHz, CDCl<sub>3</sub>) δ -124.9; HRMS (ESI) *m/z* [M+H]<sup>+</sup> calcd for C<sub>20</sub>H<sub>21</sub>ClFN<sub>4</sub>O<sup>+</sup>: 387.1382; found:387.1370.



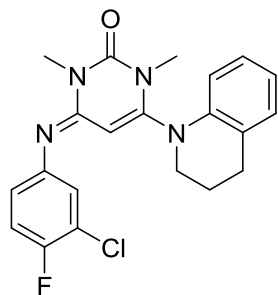

#### 4.1.3.1-14

**(E)-4-((3-chloro-4-fluorophenyl)imino)-6-(3,4-dihydroquinolin-1(2H)-yl)-1,3-dimethyl-3,4-dihydropyrimidin-2(1H)-one (14).** Product **14** was synthesized according to general experimental procedure III and purified by column chromatography (petroleum ether : ethyl acetate= 20 : 1-1 : 5). yellow liquid (354 mg, 0.89 mmol, 89% yield).  $^1\text{H}$  NMR (400 MHz,  $\text{CDCl}_3$ )  $\delta$  7.11 – 6.96 (m, 3H), 6.85 (ddd,  $J$  = 11.6, 7.2, 1.2 Hz, 2H), 6.64 (ddd,  $J$  = 8.8, 4.4, 2.8 Hz, 1H), 6.55 (d,  $J$  = 8.4, 1H), 5.31 (s, 1H), 3.49 (s, 3H), 3.36 (t,  $J$  = 5.6 Hz, 2H), 3.21 (s, 3H), 2.82 (t,  $J$  = 6.8 Hz, 2H), 2.09 – 1.93 (m, 2H);  $^{13}\text{C}\{^1\text{H}\}$  NMR (101 MHz,  $\text{CDCl}_3$ )  $\delta$  155.3, 152.8 (d,  $J$  = 7.07 Hz), 152.2, 151.8 (d,  $J$  = 1.01 Hz), 146.6 (d,  $J$  = 3.03 Hz), 141.2, 129.8, 127.1, 125.1, 123.6, 121.4 (d,  $J$  = 7.07 Hz), 121.2, 120.9 (d,  $J$  = 18.18 Hz), 116.7 (d,  $J$  = 22.22 Hz), 116.2, 89.4, 49.6, 31.6, 29.6, 26.7, 22.2;  $^{19}\text{F}$  NMR (376 MHz,  $\text{CDCl}_3$ )  $\delta$  -124.6; HRMS (ESI)  $m/z$   $[\text{M}+\text{H}]^+$  calcd for  $\text{C}_{21}\text{H}_{21}\text{ClFN}_4\text{O}^+$ : 399.1382; found:399.1370.

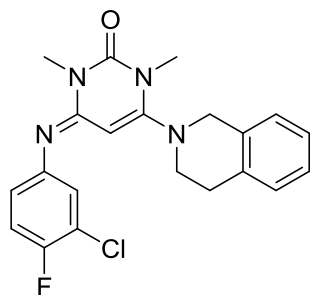

#### 4.1.3.1-15

**(E)-4-((3-chloro-4-fluorophenyl)imino)-6-(3,4-dihydroisoquinolin-2(1H)-yl)-1,3-dimethyl-3,4-dihydropyrimidin-2(1H)-one (15).** Product **15** was synthesized according to general experimental procedure III and purified by column chromatography (petroleum ether : ethyl acetate= 20 : 1-1 : 5). yellow liquid (362 mg, 0.91 mmol, 91% yield).  $^1\text{H}$  NMR (400 MHz,  $\text{CDCl}_3$ )  $\delta$  7.22 – 7.11 (m, 3H), 7.09 – 6.98 (m, 2H), 6.87 (dd,  $J$  = 6.8, 2.4 Hz, 1H), 6.70 – 6.63 (m, 1H), 5.01 (s, 1H), 3.95 (s, 2H), 3.41

(d,  $J = 28.4$  Hz, 6H), 3.16 (t,  $J = 5.2$  Hz, 2H), 2.96 (t,  $J = 6.0$  Hz, 2H);  $^{13}\text{C}\{^1\text{H}\}$  NMR (101 MHz,  $\text{CDCl}_3$ )  $\delta$  155.9, 155.2, 153.0, 152.8, 151.9 (d,  $J = 1.01$  Hz), 147.2 (d,  $J = 4.04$  Hz), 133.1, 132.3, 128.9, 127.0, 126.3 (d,  $J = 4.04$  Hz), 123.8, 121.4 (d,  $J = 7.07$  Hz), 120.9 (d,  $J = 18.18$  Hz), 116.8 (d,  $J = 22.22$  Hz), 81.4, 52.0, 48.7, 32.4, 29.4, 28.2;  $^{19}\text{F}$  NMR (376 MHz,  $\text{CDCl}_3$ )  $\delta$  -124.9; HRMS (ESI)  $m/z$   $[\text{M}+\text{H}]^+$  calcd for  $\text{C}_{21}\text{H}_{21}\text{ClFN}_4\text{O}^+$ : 399.1382; found:399.1373.

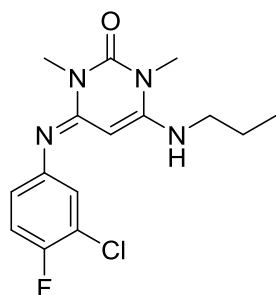

#### 4.1.3.1-16

**(E)-4-((3-chloro-4-fluorophenyl)imino)-1,3-dimethyl-6-(propylamino)-3,4-dihydropyrimidin-2(1H)-one (16).** Product **16** was synthesized according to general experimental procedure III and purified by column chromatography (petroleum ether : ethyl acetate = 20 : 1-1 : 5). yellow liquid (301 mg, 0.93 mmol, 93% yield).  $^1\text{H}$  NMR (400 MHz,  $\text{CDCl}_3$ )  $\delta$  7.03 (t,  $J = 9.2$  Hz, 1H), 6.87 (dd,  $J = 6.8, 2.4$  Hz, 1H), 6.68 (ddd,  $J = 8.8, 4.4, 2.8$  Hz, 1H), 4.46 (s, 1H), 3.39 (d,  $J = 31.2$  Hz, 6H), 2.94 – 2.76 (m, 2H), 1.58 (q,  $J = 7.2$  Hz, 2H), 0.93 (t,  $J = 7.6$  Hz, 3H);  $^{13}\text{C}\{^1\text{H}\}$  NMR (101 MHz,  $\text{CDCl}_3$ )  $\delta$  154.8, 152.5 (d,  $J = 1.01$  Hz), 152.4, 151.8, 149.8, 148.1 (d,  $J = 3.03$  Hz), 124.0, 121.8 (d,  $J = 7.07$  Hz), 120.6 (d,  $J = 18.18$  Hz), 116.7 (d,  $J = 22.22$  Hz), 69.3, 44.7, 29.4, 28.2, 21.8, 11.4;  $^{19}\text{F}$  NMR (376 MHz,  $\text{CDCl}_3$ )  $\delta$  -125.8; HRMS (ESI)  $m/z$   $[\text{M}+\text{H}]^+$  calcd for  $\text{C}_{15}\text{H}_{19}\text{ClFN}_4\text{O}^+$ : 325.1226; found:325.1232.

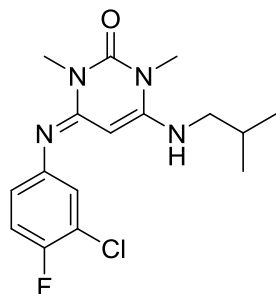

#### 4.1.3.1-17

**(E)-4-((3-chloro-4-fluorophenyl)imino)-6-(isobutylamino)-1,3-dimethyl-3,4-dihydropyrimidin-2(1H)-one (17).**

**H)-one (17).** Product **17** was synthesized according to general experimental procedure III and purified by column chromatography (petroleum ether : ethyl acetate= 20 : 1-1 : 5). yellow liquid (304 mg, 0.90 mmol, 90% yield). <sup>1</sup>H NMR (400 MHz, CDCl<sub>3</sub>) δ 7.04 (t, *J* = 8.8 Hz, 1H), 6.88 (dd, *J* = 6.8, 2.4 Hz, 1H), 6.68 (ddd, *J* = 8.8, 4.4, 2.4 Hz, 1H), 4.46 (s, 1H), 3.40 (d, *J* = 26.8 Hz, 6H), 2.69 (dd, *J* = 6.8, 4.8 Hz, 2H), 0.93 (d, *J* = 6.4 Hz, 6H); <sup>13</sup>C{<sup>1</sup>H} NMR (101 MHz, CDCl<sub>3</sub>) δ 154.8, 152.4 (d, *J* = 1.01 Hz), 152.4, 151.8, 149.9, 148.0 (d, *J* = 3.03 Hz), 124.0, 121.8 (d, *J* = 7.07 Hz), 120.6 (d, *J* = 19.19 Hz), 116.7 (d, *J* = 21.21 Hz), 69.4, 50.4, 29.5, 28.2, 27.6, 20.3; <sup>19</sup>F NMR (376 MHz, CDCl<sub>3</sub>) δ -125.8; HRMS (ESI) *m/z* [M+H]<sup>+</sup> calcd for C<sub>16</sub>H<sub>21</sub>ClFN<sub>4</sub>O<sup>+</sup>: 339.1382; found:339.1379.

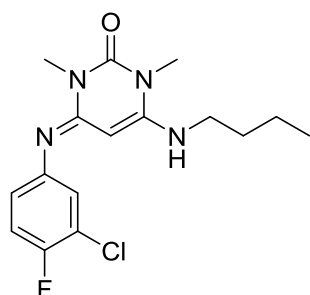

#### 4.1.3.1-18

##### **(E)-6-(butylamino)-4-((3-chloro-4-fluorophenyl)imino)-1,3-dimethyl-3,4-dihydropyrimidin-2(1H)**

**-one (18).** Product **18** was synthesized according to general experimental procedure III and purified by column chromatography (petroleum ether : ethyl acetate= 20 : 1-1 : 5). yellow liquid (294 mg, 0.87 mmol, 87% yield). <sup>1</sup>H NMR (400 MHz, CDCl<sub>3</sub>) δ 7.04 (t, *J* = 8.8 Hz, 1H), 6.88 (dd, *J* = 6.8, 2.4 Hz, 1H), 6.68 (ddd, *J* = 8.8, 4.0, 2.4 Hz, 1H), 4.47 (s, 1H), 3.39 (d, *J* = 34.4 Hz, 6H), 2.87 (td, *J* = 7.2, 4.8 Hz, 2H), 1.60 – 1.48 (m, 2H), 1.37-1.31 (m, 2H), 0.90 (t, *J* = 7.6 Hz, 3H); <sup>13</sup>C{<sup>1</sup>H} NMR (101 MHz, CDCl<sub>3</sub>) δ 154.8, 152.4 (d, *J* = 1.01 Hz), 152.4, 151.8, 149.8, 148.1 (d, *J* = 3.03 Hz), 124.0, 121.8 (d, *J* = 7.07 Hz), 120.7 (d, *J* = 18.18 Hz), 116.7 (d, *J* = 22.22 Hz), 69.3, 42.7, 30.6, 29.4, 28.2, 20.0, 13.7; <sup>19</sup>F NMR (376 MHz, CDCl<sub>3</sub>) δ -125.8; HRMS (ESI) *m/z* [M+H]<sup>+</sup> calcd for C<sub>16</sub>H<sub>21</sub>ClFN<sub>4</sub>O<sup>+</sup>: 339.1382; found:339.1385.

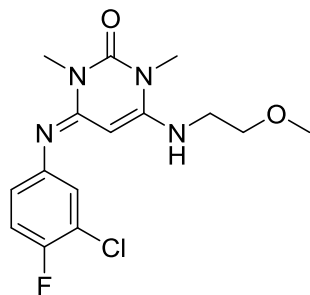

#### 4.1.3.1-19

**(E)-4-((3-chloro-4-fluorophenyl)imino)-6-((2-methoxyethyl)amino)-1,3-dimethyl-3,4-dihydropyrimidin-2(1H)-one (19).** Product **19** was synthesized according to general experimental procedure III and purified by column chromatography (petroleum ether : ethyl acetate= 20 : 1-1 : 5). yellow liquid (286 mg, 0.84 mmol, 84% yield).  $^1\text{H}$  NMR (400 MHz,  $\text{CDCl}_3$ )  $\delta$  7.03 (t,  $J$  = 8.8 Hz, 1H), 6.87 (dd,  $J$  = 6.8, 2.4 Hz, 1H), 6.70 – 6.65 (m, 1H), 4.46 (s, 1H), 3.55 – 3.52 (m, 2H), 3.44 (s, 3H), 3.36 (s, 3H), 3.02 (q,  $J$  = 4.8 Hz, 2H);  $^{13}\text{C}\{^1\text{H}\}$  NMR (101 MHz,  $\text{CDCl}_3$ )  $\delta$  154.8, 152.4 (d,  $J$  = 3.03 Hz), 151.7, 150.0, 148.0 (d,  $J$  = 3.03 Hz), 124.0, 121.8 (d,  $J$  = 6.06 Hz), 120.7 (d,  $J$  = 18.18 Hz), 116.7 (d,  $J$  = 22.22 Hz), 69.6, 69.2, 58.9, 42.4, 29.5, 28.3;  $^{19}\text{F}$  NMR (376 MHz,  $\text{CDCl}_3$ )  $\delta$  -125.8; HRMS (ESI)  $m/z$   $[\text{M}+\text{H}]^+$  calcd for  $\text{C}_{15}\text{H}_{19}\text{ClFN}_4\text{O}_2^+$ : 341.1175; found:341.1173.

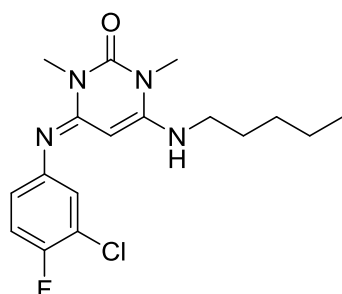

#### 4.1.3.1-20

**(E)-4-((3-chloro-4-fluorophenyl)imino)-1,3-dimethyl-6-(pentylamino)-3,4-dihydropyrimidin-2(1H)-one (20).** Product **20** was synthesized according to general experimental procedure III and purified by column chromatography (petroleum ether : ethyl acetate= 20 : 1-1 : 5). yellow liquid (310 mg, 0.88 mmol, 88% yield).  $^1\text{H}$  NMR (400 MHz,  $\text{CDCl}_3$ )  $\delta$  7.02 (t,  $J$  = 8.8 Hz, 1H), 6.87 (dd,  $J$  = 6.8, 2.4 Hz, 1H), 6.67 (ddd,  $J$  = 8.8, 4.4, 2.4 Hz, 1H), 4.45 (s, 1H), 3.42 (s, 3H), 3.34 (s, 3H), 2.86 (q,  $J$  = 7.2 Hz, 2H), 1.61 – 1.46 (m, 2H), 1.32 – 1.23 (m, 4H), 0.87 (t,  $J$  = 6.8 Hz, 3H);  $^{13}\text{C}\{^1\text{H}\}$  NMR (101 MHz,

CDCl<sub>3</sub>) δ 154.8, 152.5 (d, *J* = 1.01 Hz), 152.4, 151.8, 149.8, 148.1 (d, *J* = 3.03 Hz), 124.0, 121.8 (d, *J* = 6.06 Hz), 120.7 (d, *J* = 18.18 Hz), 116.7 (d, *J* = 21.21 Hz), 69.3, 43.0, 29.4, 29.0, 28.2, 28.2, 22.3, 13.9; <sup>19</sup>F NMR (376 MHz, CDCl<sub>3</sub>) δ -125.8; HRMS (ESI) *m/z* [M+H]<sup>+</sup> calcd for C<sub>17</sub>H<sub>23</sub>ClFN<sub>4</sub>O<sup>+</sup>: 353.1539; found:353.1534.

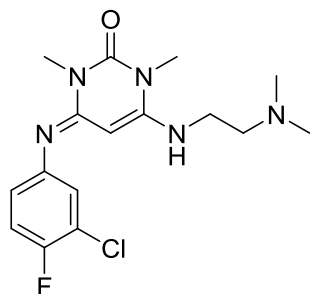

#### 4.1.3.1-21

**(E)-4-((3-chloro-4-fluorophenyl)imino)-6-((2-(dimethylamino)ethyl)amino)-1,3-dimethyl-3,4-dihydropyrimidin-2(1H)-one (21).** Product **21** was synthesized according to general experimental procedure III and purified by column chromatography (petroleum ether : ethyl acetate= 20 : 1-1 : 5). yellow liquid (318 mg, 0.90 mmol, 90% yield). <sup>1</sup>H NMR (400 MHz, CDCl<sub>3</sub>) δ 7.03 (t, *J* = 8.8 Hz, 1H), 6.88 (dd, *J* = 6.4, 2.4Hz, 1H), 6.69 (ddd, *J* = 8.8, 4.4, 2.8 Hz, 1H), 4.41 (s, 1H), 3.40 (d, *J* = 38.4 Hz, 6H), 2.86 (t, *J* = 5.6 Hz, 2H), 2.50 (dd, *J* = 6.4, 4.8 Hz, 2H), 2.22 (s, 6H); <sup>13</sup>C{<sup>1</sup>H} NMR (101 MHz, CDCl<sub>3</sub>) δ 154.8, 152.6 (d, *J* = 1.01 Hz), 152.4, 151.8, 150.1, 148.2 (d, *J* = 3.03 Hz), 124.0, 121.8 (d, *J* = 7.07 Hz), 120.7 (d, *J* = 18.18 Hz), 116.7 (d, *J* = 21.21 Hz), 69.1, 56.2, 44.8, 39.5, 29.4, 28.3; <sup>19</sup>F NMR (376 MHz, CDCl<sub>3</sub>) δ -125.9; HRMS (ESI) *m/z* [M+H]<sup>+</sup> calcd for C<sub>16</sub>H<sub>22</sub>ClFN<sub>5</sub>O<sup>+</sup>: 354.1491; found:354.1480.

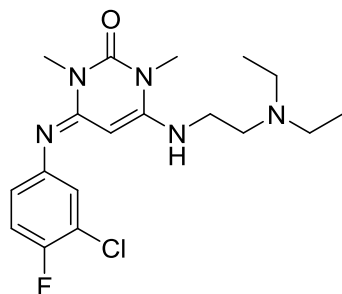

#### 4.1.3.1-22

**(E)-4-((3-chloro-4-fluorophenyl)imino)-6-((2-(diethylamino)ethyl)amino)-1,3-dimethyl-3,4-dihydr**

**opyrimidin-2(1H)-one (22).** Product **22** was synthesized according to general experimental procedure III and purified by column chromatography (petroleum ether : ethyl acetate= 20 : 1-1 : 5). yellow liquid (335 mg, 0.88 mmol, 88% yield).  $^1\text{H}$  NMR (400 MHz,  $\text{CDCl}_3$ )  $\delta$  7.01 (t,  $J = 8.8$  Hz, 1H), 6.87 (dd,  $J = 6.4, 2.4$  Hz, 1H), 6.67 (ddd,  $J = 8.4, 4.0, 2.4$  Hz, 1H), 4.39 (s, 1H), 3.38 (d,  $J = 42.8$  Hz, 6H), 2.82 (t,  $J = 5.6$  Hz, 2H), 2.63 (t,  $J = 5.6$  Hz, 2H), 2.49 (q,  $J = 7.2$  Hz, 4H), 0.99 (t,  $J = 6.8$  Hz, 6H);  $^{13}\text{C}\{^1\text{H}\}$  NMR (101 MHz,  $\text{CDCl}_3$ )  $\delta$  154.8, 152.7 (d,  $J = 1.01$  Hz), 152.4, 151.8, 150.0, 148.3 (d,  $J = 3.03$  Hz), 124.0, 121.9 (d,  $J = 7.07$  Hz), 120.6 (d,  $J = 18.18$  Hz), 116.7 (d,  $J = 21.21$  Hz), 69.0, 49.8, 46.3, 39.3, 29.4, 28.3, 12.1;  $^{19}\text{F}$  NMR (376 MHz,  $\text{CDCl}_3$ )  $\delta$  -126.0; HRMS (ESI)  $m/z$   $[\text{M}+\text{H}]^+$  calcd for  $\text{C}_{18}\text{H}_{26}\text{ClFN}_5\text{O}^+$ : 382.1804; found:382.1791.

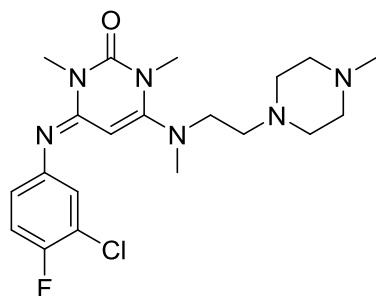

#### 4.1.3.1-23

**(E)-4-((3-chloro-4-fluorophenyl)imino)-1,3-dimethyl-6-(methyl(2-(4-methylpiperazin-1-yl)ethyl)amino)-3,4-dihydropyrimidin-2(1H)-one (23).** Product **23** was synthesized according to general experimental procedure III and purified by column chromatography (methylene chloride: methanol = 20 : 1). yellow liquid (363 mg, 0.86 mmol, 86% yield).  $^1\text{H}$  NMR (400 MHz,  $\text{CDCl}_3$ )  $\delta$  7.04 (t,  $J = 8.8$  Hz, 1H), 6.84 (dd,  $J = 6.8, 2.4$  Hz, 1H), 6.64 (ddd,  $J = 8.8, 4.4, 2.8$  Hz, 1H), 4.88 (s, 1H), 3.41 (s, 3H), 3.30 (s, 3H), 2.81 (t,  $J = 6.0$  Hz, 5H), 2.77 – 2.70 (m, 1H), 2.60 (s, 8H);  $^{13}\text{C}\{^1\text{H}\}$  NMR (101 MHz,  $\text{CDCl}_3$ )  $\delta$  156.0, 155.2, 153.0, 152.8, 151.8, 147.1 (d,  $J = 4.04$  Hz), 123.7, 121.5 (d,  $J = 6.06$  Hz), 120.9 (d,  $J = 18.18$  Hz), 116.8 (d,  $J = 21.21$  Hz), 81.4, 55.2, 54.1, 52.5, 50.0, 44.6, 32.1, 29.4;  $^{19}\text{F}$  NMR (376 MHz,  $\text{CDCl}_3$ )  $\delta$  -124.9; HRMS (ESI)  $m/z$   $[\text{M}+\text{H}]^+$  calcd for  $\text{C}_{20}\text{H}_{29}\text{ClFN}_6\text{O}^+$ : 423.2070; found:423.2073.

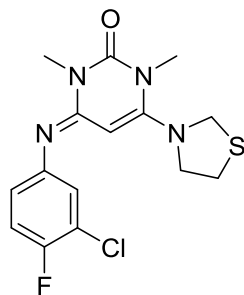

#### 4.1.3.1-24

**(E)-4-((3-chloro-4-fluorophenyl)imino)-1,3-dimethyl-6-(thiazolidin-3-yl)-3,4-dihydropyrimidin-2(1H)-one (24).** Product **24** was synthesized according to general experimental procedure III and purified by column chromatography (petroleum ether : ethyl acetate= 20 : 1-1 : 5). yellow liquid (315 mg, 0.89 mmol, 89% yield).  $^1\text{H}$  NMR (400 MHz,  $\text{CDCl}_3$ )  $\delta$  7.05 (t,  $J$  = 8.8 Hz, 1H), 6.85 (dd,  $J$  = 6.8, 2.8 Hz, 1H), 6.64 (ddd,  $J$  = 8.8, 4.0, 2.4 Hz, 1H), 5.24 (s, 1H), 4.19 (s, 2H), 3.41 (d,  $J$  = 7.2 Hz, 6H), 3.34 (t,  $J$  = 6.0 Hz, 2H), 2.91 (t,  $J$  = 6.4 Hz, 2H);  $^{13}\text{C}\{^1\text{H}\}$  NMR (101 MHz,  $\text{CDCl}_3$ )  $\delta$  155.2, 153.2, 152.8 (d,  $J$  = 10.1 Hz), 151.4 (d,  $J$  = 2.02 Hz), 146.8 (d,  $J$  = 3.03 Hz), 123.7, 121.4 (d,  $J$  = 7.07 Hz), 120.9 (d,  $J$  = 18.18 Hz), 116.8 (d,  $J$  = 22.22 Hz), 81.6, 55.0, 54.5, 32.6, 30.0, 29.5;  $^{19}\text{F}$  NMR (376 MHz,  $\text{CDCl}_3$ )  $\delta$  -124.6; HRMS (ESI)  $m/z$   $[\text{M}+\text{H}]^+$  calcd for  $\text{C}_{15}\text{H}_{17}\text{ClFN}_4\text{OS}^+$ : 355.0790; found:355.0780.

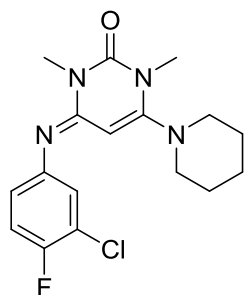

#### 4.1.3.1-25

**(E)-4-((3-chloro-4-fluorophenyl)imino)-1,3-dimethyl-6-(piperidin-1-yl)-3,4-dihydropyrimidin-2(1H)-one (25).** Product **25** was synthesized according to general experimental procedure III and purified by column chromatography (petroleum ether : ethyl acetate= 20 : 1-1 : 5). yellow liquid (319 mg, 0.91 mmol, 91% yield).  $^1\text{H}$  NMR (400 MHz,  $\text{CDCl}_3$ )  $\delta$  7.04 (t,  $J$  = 8.8 Hz, 1H), 6.86 (dd,  $J$  = 6.4, 2.4 Hz, 1H), 6.66 (ddd,  $J$  = 8.8, 4.4, 2.8 Hz, 1H), 4.86 (s, 1H), 3.42 (s, 3H), 3.31 (s, 3H), 2.71 (s, 4H), 1.72 – 1.50 (m, 6H);  $^{13}\text{C}\{^1\text{H}\}$  NMR (101 MHz,  $\text{CDCl}_3$ )  $\delta$  157.1, 155.1, 153.1, 152.7, 152.2 (d,  $J$  = 1.01 Hz),

147.3 (d,  $J = 3.03$  Hz), 123.8, 121.5 (d,  $J = 6.06$  Hz), 120.8 (d,  $J = 18.18$  Hz), 116.7 (d,  $J = 22.22$  Hz), 81.0, 51.5, 32.1, 29.3, 25.3, 23.9;  $^{19}\text{F}$  NMR (376 MHz,  $\text{CDCl}_3$ )  $\delta$  -125.1; HRMS (ESI)  $m/z$   $[\text{M}+\text{H}]^+$  calcd for  $\text{C}_{17}\text{H}_{21}\text{ClFN}_4\text{O}^+$ : 351.1382; found:351.1377.

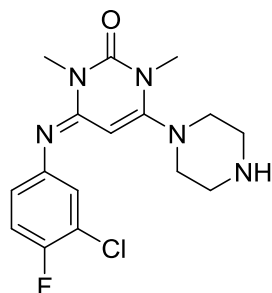

#### 4.1.3.1-26

**(E)-4-((3-chloro-4-fluorophenyl)imino)-1,3-dimethyl-6-(piperazin-1-yl)-3,4-dihydropyrimidin-2(1H)-one (26).** Product **26** was synthesized according to general experimental procedure III and purified by column chromatography (petroleum ether : ethyl acetate= 20 : 1-1 : 5). yellow liquid (305 mg, 0.87 mmol, 87% yield).  $^1\text{H}$  NMR (400 MHz,  $\text{CDCl}_3$ )  $\delta$  7.02 (t,  $J = 8.8$  Hz, 1H), 6.83 (dd,  $J = 6.4, 2.4$  Hz, 1H), 6.63 (ddd,  $J = 8.8, 4.0, 2.4$  Hz, 1H), 4.87 (s, 1H), 3.39 (s, 3H), 3.30 (s, 3H), 3.13 (s, H), 2.93 (t,  $J = 4.8$  Hz, 4H), 2.74 (s, 3H);  $^{13}\text{C}\{^1\text{H}\}$  NMR (101 MHz,  $\text{CDCl}_3$ )  $\delta$  156.3, 155.1, 153.0, 152.7, 151.9 (d,  $J = 1.01$  Hz), 147.1 (d,  $J = 3.03$  Hz), 123.7, 121.4 (d,  $J = 7.07$  Hz), 120.8 (d,  $J = 18.18$  Hz), 116.8 (d,  $J = 21.21$  Hz), 81.3, 51.2, 45.1, 32.1, 29.4;  $^{19}\text{F}$  NMR (376 MHz,  $\text{CDCl}_3$ )  $\delta$  -124.9; HRMS (ESI)  $m/z$   $[\text{M}+\text{H}]^+$  calcd for  $\text{C}_{16}\text{H}_{20}\text{ClFN}_5\text{O}^+$ : 352.1335; found:352.1326.

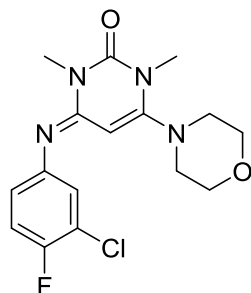

#### 4.1.3.1-27

**(E)-4-((3-chloro-4-fluorophenyl)imino)-1,3-dimethyl-6-morpholino-3,4-dihydropyrimidin-2(1H)-one (27).** Product **27** was synthesized according to general experimental procedure III and purified by



column chromatography (petroleum ether : ethyl acetate= 20 : 1-1 : 5). yellow liquid (313 mg, 0.89 mmol, 89% yield).  $^1\text{H}$  NMR (400 MHz,  $\text{CDCl}_3$ )  $\delta$  7.04 (t,  $J = 8.8$  Hz, 1H), 6.85 (dd,  $J = 6.4, 2.4$  Hz, 1H), 6.65 (ddd,  $J = 8.8, 4.0, 2.4$  Hz, 1H), 4.90 (s, 1H), 3.75 (t,  $J = 4.8$  Hz, 4H), 3.41 (s, 3H), 3.33 (s, 3H), 2.77 (t,  $J = 4.8$  Hz, 4H);  $^{13}\text{C}\{^1\text{H}\}$  NMR (101 MHz,  $\text{CDCl}_3$ )  $\delta$  155.9, 155.2, 152.8 (d,  $J = 13.13$  Hz), 151.7 (d,  $J = 1.01$  Hz), 147.0 (d,  $J = 4.04$  Hz), 123.7, 121.4 (d,  $J = 7.07$  Hz), 120.9 (d,  $J = 18.18$  Hz), 116.8 (d,  $J = 22.22$  Hz), 81.4, 66.1, 50.6, 32.1, 29.4;  $^{19}\text{F}$  NMR (376 MHz,  $\text{CDCl}_3$ )  $\delta$  -124.7; HRMS (ESI)  $m/z$   $[\text{M}+\text{H}]^+$  calcd for  $\text{C}_{16}\text{H}_{19}\text{ClFN}_4\text{O}_2^+$ : 353.1175; found:353.1162.

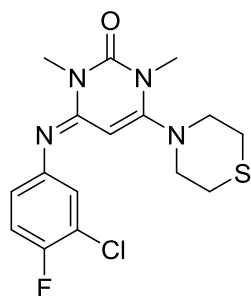

#### 4.1.3.1-28

**(E)-4-((3-chloro-4-fluorophenyl)imino)-1,3-dimethyl-6-thiomorpholino-3,4-dihydropyrimidin-2(1H)-one (28).** Product **28** was synthesized according to general experimental procedure III and purified by column chromatography (petroleum ether : ethyl acetate= 20 : 1-1 : 5). yellow liquid (305 mg, 0.83 mmol, 83% yield).  $^1\text{H}$  NMR (400 MHz,  $\text{CDCl}_3$ )  $\delta$  7.05 (t,  $J = 8.8$  Hz, 1H), 6.85 (dd,  $J = 6.4, 2.4$  Hz, 1H), 6.70 – 6.57 (m, 1H), 4.91 (s, 1H), 3.42 (s, 3H), 3.31 (s, 3H), 3.02 (s, 4H), 2.71 (s, 4H);  $^{13}\text{C}\{^1\text{H}\}$  NMR (101 MHz,  $\text{CDCl}_3$ )  $\delta$  156.7, 155.2, 152.8 (d,  $J = 3.03$  Hz), 151.7, 147.0 (d,  $J = 4.04$  Hz), 123.7, 121.3 (d,  $J = 6.06$  Hz), 121.0 (d,  $J = 18.18$  Hz), 116.8 (d,  $J = 21.21$  Hz), 82.4, 52.7, 31.9, 29.4, 27.2;  $^{19}\text{F}$  NMR (376 MHz,  $\text{CDCl}_3$ )  $\delta$  -124.7; HRMS (ESI)  $m/z$   $[\text{M}+\text{H}]^+$  calcd for  $\text{C}_{16}\text{H}_{19}\text{ClFN}_4\text{OS}^+$ : 369.0947; found:369.0942.

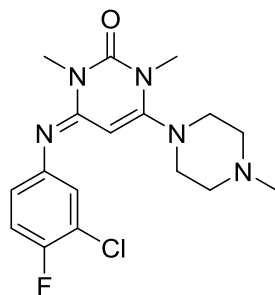

#### 4.1.3.1-29

**(E)-4-((3-chloro-4-fluorophenyl)imino)-1,3-dimethyl-6-(4-methylpiperazin-1-yl)-3,4-dihydropyrimidin-2(1H)-one (29)**. Product **29** was synthesized according to general experimental procedure III and purified by column chromatography (petroleum ether : ethyl acetate= 20 : 1-1 : 5). yellow liquid (321 mg, 0.88 mmol, 88% yield).  $^1\text{H}$  NMR (400 MHz,  $\text{CDCl}_3$ )  $\delta$  7.04 (t,  $J = 8.8$  Hz, 1H), 6.85 (dd,  $J = 6.8, 2.8$  Hz, 1H), 6.73 – 6.59 (m, 1H), 4.91 (s, 1H), 3.41 (s, 3H), 3.31 (s, 3H), 2.79 (s, 4H), 2.47 (s, 4H), 2.30 (s, 3H);  $^{13}\text{C}\{^1\text{H}\}$  NMR (101 MHz,  $\text{CDCl}_3$ )  $\delta$  156.2, 155.2, 152.9 (d,  $J = 26.26$  Hz), 151.9, 147.1 (d,  $J = 3.03$  Hz), 123.7, 121.4 (d,  $J = 7.07$  Hz), 120.9 (d,  $J = 19.19$  Hz), 116.8 (d,  $J = 21.21$  Hz), 81.2, 54.2, 50.1, 46.0, 32.2, 29.4;  $^{19}\text{F}$  NMR (376 MHz,  $\text{CDCl}_3$ )  $\delta$  -124.9; HRMS (ESI)  $m/z$   $[\text{M}+\text{H}]^+$  calcd for  $\text{C}_{17}\text{H}_{22}\text{ClFN}_5\text{O}^+$ : 366.1491; found:366.1480.

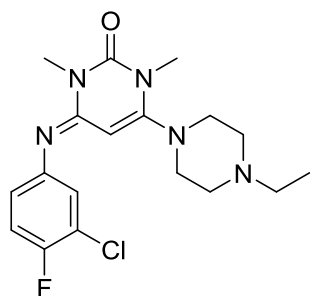

#### 4.1.3.1-30

**(E)-4-((3-chloro-4-fluorophenyl)imino)-6-(4-ethylpiperazin-1-yl)-1,3-dimethyl-3,4-dihydropyrimidin-2(1H)-one (30)**. Product **30** was synthesized according to general experimental procedure III and purified by column chromatography (petroleum ether : ethyl acetate= 20 : 1-1 : 5). yellow liquid (326 mg, 0.86 mmol, 86% yield).  $^1\text{H}$  NMR (400 MHz,  $\text{CDCl}_3$ )  $\delta$  7.03 (t,  $J = 8.8$  Hz, 1H), 6.84 (dd,  $J = 6.4, 2.4$  Hz, 1H), 6.64 (ddd,  $J = 8.4, 4.0, 2.4$  Hz, 1H), 4.91 (s, 1H), 3.41 (s, 3H), 3.31 (s, 3H), 2.80 (s, 4H), 2.51 (s, 3H), 2.42 (q,  $J = 7.2$  Hz, 3H), 1.06 (t,  $J = 7.2$  Hz, 3H);  $^{13}\text{C}\{^1\text{H}\}$  NMR (101 MHz,  $\text{CDCl}_3$ )  $\delta$  156.2, 155.2, 152.9 (d,  $J = 25.25$  Hz) 151.9 (d,  $J = 1.01$  Hz), 147.1 (d,  $J = 3.03$  Hz), 123.7, 121.4 (d,  $J = 7.07$  Hz), 120.9 (d,  $J = 19.19$  Hz), 116.8 (d,  $J = 21.21$  Hz), 81.3, 52.1, 52.0, 50.2, 32.1, 29.4, 12.0;  $^{19}\text{F}$  NMR (376 MHz,  $\text{CDCl}_3$ )  $\delta$  -124.9; HRMS (ESI)  $m/z$   $[\text{M}+\text{H}]^+$  calcd for  $\text{C}_{18}\text{H}_{24}\text{ClFN}_5\text{O}^+$ : 380.1684; found:380.1636.

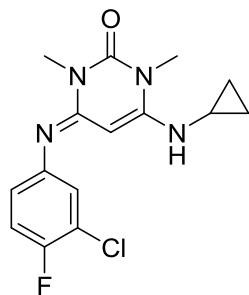

#### 4.1.3.1-31

##### (E)-4-((3-chloro-4-fluorophenyl)imino)-6-(cyclopropylamino)-1,3-dimethyl-3,4-dihydropyrimidin

**-2(1H)-one (31).** Product **31** was synthesized according to general experimental procedure III and purified by column chromatography (petroleum ether : ethyl acetate= 20 : 1-1 : 5). yellow liquid (293 mg, 0.91 mmol, 91% yield).  $^1\text{H}$  NMR (400 MHz,  $\text{CDCl}_3$ )  $\delta$  7.04 (t,  $J = 8.8\text{Hz}$ , 1H), 6.93 (dd,  $J = 6.8$ , 2.4 Hz, 1H), 6.73 (ddd,  $J = 8.8$ , 4.4, 2.8 Hz, 1H), 4.98 (s, 1H), 3.44 (s, 3H), 3.29 (s, 3H), 2.32 – 2.17 (m, 1H), 0.75 – 0.62 (m, 2H), 0.57 – 0.45 (m, 2H);  $^{13}\text{C}\{^1\text{H}\}$  NMR (101 MHz,  $\text{CDCl}_3$ )  $\delta$  154.8, 152.6 (d,  $J = 1.01$  Hz), 152.4, 151.8, 150.6, 148.0 (d,  $J = 3.03$  Hz), 124.1, 122.0 (d,  $J = 7.07$  Hz), 120.5 (d,  $J = 18.18$  Hz), 116.6 (d,  $J = 21.21$  Hz), 71.3, 29.5, 28.3, 24.3, 7.3;  $^{19}\text{F}$  NMR (376 MHz,  $\text{CDCl}_3$ )  $\delta$  -125.7; HRMS (ESI)  $m/z$   $[\text{M}+\text{H}]^+$  calcd for  $\text{C}_{15}\text{H}_{17}\text{ClFN}_4\text{O}^+$ : 323.1069; found:323.1060.

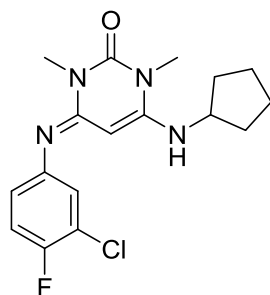

#### 4.1.3.1-32

##### (E)-4-((3-chloro-4-fluorophenyl)imino)-6-(cyclopentylamino)-1,3-dimethyl-3,4-dihydropyrimidin-

**2(1H)-one (32).** Product **32** was synthesized according to general experimental procedure III and purified by column chromatography (petroleum ether : ethyl acetate= 20 : 1-1 : 5). yellow liquid (311 mg, 0.89 mmol, 89% yield).  $^1\text{H}$  NMR (400 MHz,  $\text{CDCl}_3$ )  $\delta$  7.01 (t,  $J = 8.4$  Hz, 1H), 6.88 (dd,  $J = 6.8, 2.8$  Hz, 1H), 6.76 – 6.62 (m, 1H), 4.51 (s, 1H), 3.92 (s, 1H), 3.43 (s, 3H), 3.33 (s, 3H), 1.93 – 1.82 (m, 2H), 1.73 – 1.53 (m, 4H), 1.48-1.36 (m, 2H);  $^{13}\text{C}\{^1\text{H}\}$  NMR (101 MHz,  $\text{CDCl}_3$ )  $\delta$  154.8, 152.5 (d,  $J$

= 1.01 Hz), 152.4, 151.8, 149.3, 148.0 (d,  $J = 3.03$  Hz), 124.1, 122.0 (d,  $J = 6.06$  Hz), 120.6 (d,  $J = 18.18$  Hz), 116.6 (d,  $J = 21.21$  Hz), 70.5, 54.0, 33.2, 29.4, 28.3, 24.1;  $^{19}\text{F}$  NMR (376 MHz,  $\text{CDCl}_3$ )  $\delta$  -125.8; HRMS (ESI)  $m/z$   $[\text{M}+\text{H}]^+$  calcd for  $\text{C}_{17}\text{H}_{21}\text{ClFN}_4\text{O}^+$ : 351.1382; found:351.1378.

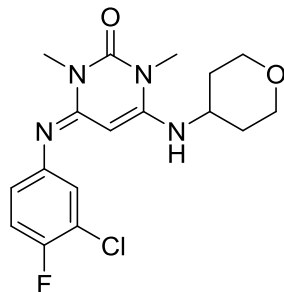

#### 4.1.3.1-33

**(E)-4-((3-chloro-4-fluorophenyl)imino)-1,3-dimethyl-6-((tetrahydro-2H-pyran-4-yl)amino)-3,4-dihydropyrimidin-2(1H)-one (33).** Product **33** was synthesized according to general experimental procedure III and purified by column chromatography (petroleum ether : ethyl acetate= 20 : 1-1 : 5). yellow liquid (299 mg, 0.85 mmol, 85% yield).  $^1\text{H}$  NMR (400 MHz,  $\text{CDCl}_3$ )  $\delta$  7.03 (t,  $J = 8.8$  Hz, 1H), 6.87 (dd,  $J = 6.4, 2.4$  Hz, 1H), 6.68 (ddd,  $J = 8.8, 4.4, 2.4$  Hz, 1H), 4.53 (s, 1H), 3.92 (dt,  $J = 12.0, 3.6$  Hz, 2H), 3.43 (s, 3H), 3.35 (s, 3H), 3.18 (s, 1H), 1.89 (d,  $J = 12.4$  Hz, 2H), 1.55 – 1.42 (m, 2H), 1.27 – 1.19 (m, 2H);  $^{13}\text{C}\{^1\text{H}\}$  NMR (101 MHz,  $\text{CDCl}_3$ )  $\delta$  154.8, 152.4, 152.3 (d,  $J = 1.01$  Hz), 151.8, 148.4, 147.8 (d,  $J = 3.03$  Hz), 124.0, 121.9 (d,  $J = 6.06$  Hz), 120.6 (d,  $J = 18.18$  Hz), 116.6 (d,  $J = 21.21$  Hz), 70.0, 66.1, 48.8, 32.6, 29.5, 28.4;  $^{19}\text{F}$  NMR (376 MHz,  $\text{CDCl}_3$ )  $\delta$  -125.4; HRMS (ESI)  $m/z$   $[\text{M}+\text{H}]^+$  calcd for  $\text{C}_{17}\text{H}_{21}\text{ClFN}_4\text{O}_2^+$ : 367.1332; found:367.1319.

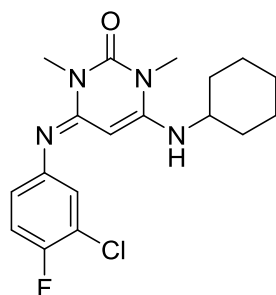

#### 4.1.3.1-34

**(E)-4-((3-chloro-4-fluorophenyl)imino)-6-(cyclohexylamino)-1,3-dimethyl-3,4-dihydropyrimidin-2(1H)-one (34).** Product **34** was synthesized according to general experimental procedure III and

purified by column chromatography (petroleum ether : ethyl acetate= 20 : 1-1 : 5). yellow liquid (335 mg, 0.92 mmol, 92% yield).  $^1\text{H}$  NMR (400 MHz,  $\text{CDCl}_3$ )  $\delta$  7.03 (t,  $J = 9.2$  Hz, 1H), 6.90 (dd,  $J = 6.8$ , 2.8 Hz, 1H), 6.76 – 6.63 (m, 1H), 4.52 (s, 1H), 3.85 (d,  $J = 6.8$  Hz, 1H), 3.44 (s, 3H), 3.34 (s, 3H), 3.03 – 2.89 (m, 1H), 1.90 (d,  $J = 11.2$  Hz, 2H), 1.76 – 1.65 (m, 2H), 1.60 (d,  $J = 9.6$  Hz, 1H), 1.30 – 1.13 (m, 6H);  $^{13}\text{C}\{^1\text{H}\}$  NMR (101 MHz,  $\text{CDCl}_3$ )  $\delta$  154.8, 152.6 (d,  $J = 1.01$  Hz), 152.4, 151.9, 148.6, 148.1 (d,  $J = 3.03$  Hz), 124.1, 122.0 (d,  $J = 6.06$  Hz), 120.5 (d,  $J = 18.18$  Hz), 116.6 (d,  $J = 22.22$  Hz), 69.6, 51.3, 32.4, 29.4, 28.2, 25.4, 24.3;  $^{19}\text{F}$  NMR (376 MHz,  $\text{CDCl}_3$ )  $\delta$  -125.8; HRMS (ESI)  $m/z$   $[\text{M}+\text{H}]^+$  calcd for  $\text{C}_{18}\text{H}_{23}\text{ClFN}_4\text{O}^+$ : 365.1539; found:365.1527.

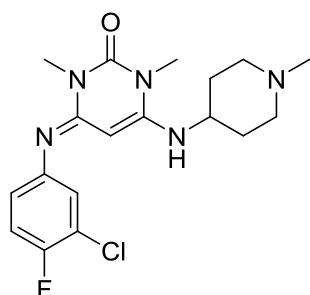

#### 4.1.3.1-35

**(E)-4-((3-chloro-4-fluorophenyl)imino)-1,3-dimethyl-6-((1-methylpiperidin-4-yl)amino)-3,4-dihydropyrimidin-2(1H)-one (35).** Product **35** was synthesized according to general experimental procedure III and purified by column chromatography (methylene chloride: methanol= 20 : 1). yellow liquid (307 mg, 0.81 mmol, 81% yield).  $^1\text{H}$  NMR (400 MHz,  $\text{CDCl}_3$ )  $\delta$  7.04 (t,  $J = 8.8$  Hz, 1H), 6.89 (dd,  $J = 6.8$ , 2.4 Hz, 1H), 6.69 (ddd,  $J = 8.8$ , 4.4, 2.8 Hz, 1H), 4.52 (s, 1H), 3.44 (s, 3H), 3.36 (s, 3H), 3.04 – 2.90 (m, 1H), 2.74 (d,  $J = 11.2$  Hz, 2H), 2.28 (s, 3H), 2.18 – 1.99 (m, 3H), 1.93 (d,  $J = 12.8$  Hz, 2H);  $^{13}\text{C}\{^1\text{H}\}$  NMR (101 MHz,  $\text{CDCl}_3$ )  $\delta$  154.8, 152.4, 151.8, 148.6, 148.0 (d,  $J = 3.03$  Hz), 124.0, 121.9 (d,  $J = 6.06$  Hz), 120.6 (d,  $J = 18.18$  Hz), 116.6 (d,  $J = 21.21$  Hz), 69.9, 53.7, 46.0, 31.7, 29.4, 28.3;  $^{19}\text{F}$  NMR (376 MHz,  $\text{CDCl}_3$ )  $\delta$  -125.7; HRMS (ESI)  $m/z$   $[\text{M}+\text{H}]^+$  calcd for  $\text{C}_{18}\text{H}_{24}\text{ClFN}_5\text{O}^+$ : 380.1648; found:380.1651.

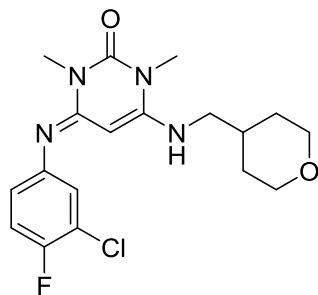

#### 4.1.3.1-36

**(E)-4-((3-chloro-4-fluorophenyl)imino)-1,3-dimethyl-6-(((tetrahydro-2H-pyran-4-yl)methyl)amino)-3,4-dihydropyrimidin-2(1H)-one (36).** Product **36** was synthesized according to general experimental procedure III and purified by column chromatography (petroleum ether : ethyl acetate= 20 : 1-1 : 5). yellow liquid (319 mg, 0.84 mmol, 84% yield).  $^1\text{H}$  NMR (400 MHz,  $\text{CDCl}_3$ )  $\delta$  7.03 (t,  $J$  = 8.8 Hz, 1H), 6.87 (dd,  $J$  = 6.8, 2.4 Hz, 1H), 6.68 (ddd,  $J$  = 8.4, 4.0, 2.4 Hz, 1H), 4.45 (s, 1H), 3.96 (dd,  $J$  = 11.2, 3.2 Hz, 4H), 3.46 – 3.29 (m, 8H), 2.79 (d,  $J$  = 6.4 Hz, 2H), 1.82 – 1.70 (m, 1H), 1.58 – 1.49 (m, 2H), 1.32 – 1.25 (m, 2H);  $^{13}\text{C}\{^1\text{H}\}$  NMR (101 MHz,  $\text{CDCl}_3$ )  $\delta$  154.8, 152.4, 152.4 (d,  $J$  = 1.01 Hz), 151.7, 149.8, 148.0 (d,  $J$  = 4.04 Hz), 123.9, 121.9 (d,  $J$  = 7.07 Hz), 120.6 (d,  $J$  = 19.19 Hz), 116.7 (d,  $J$  = 21.21 Hz), 69.6, 67.4, 48.8, 34.2, 30.8, 29.5, 28.3;  $^{19}\text{F}$  NMR (376 MHz,  $\text{CDCl}_3$ )  $\delta$  -125.5; HRMS (ESI)  $m/z$   $[\text{M}+\text{H}]^+$  calcd for  $\text{C}_{18}\text{H}_{23}\text{ClFN}_4\text{O}_2^+$ : 381.1488; found:381.1484.

## 4. $^1\text{H}$ NMR, $^{13}\text{C}$ NMR spectra and HRMS

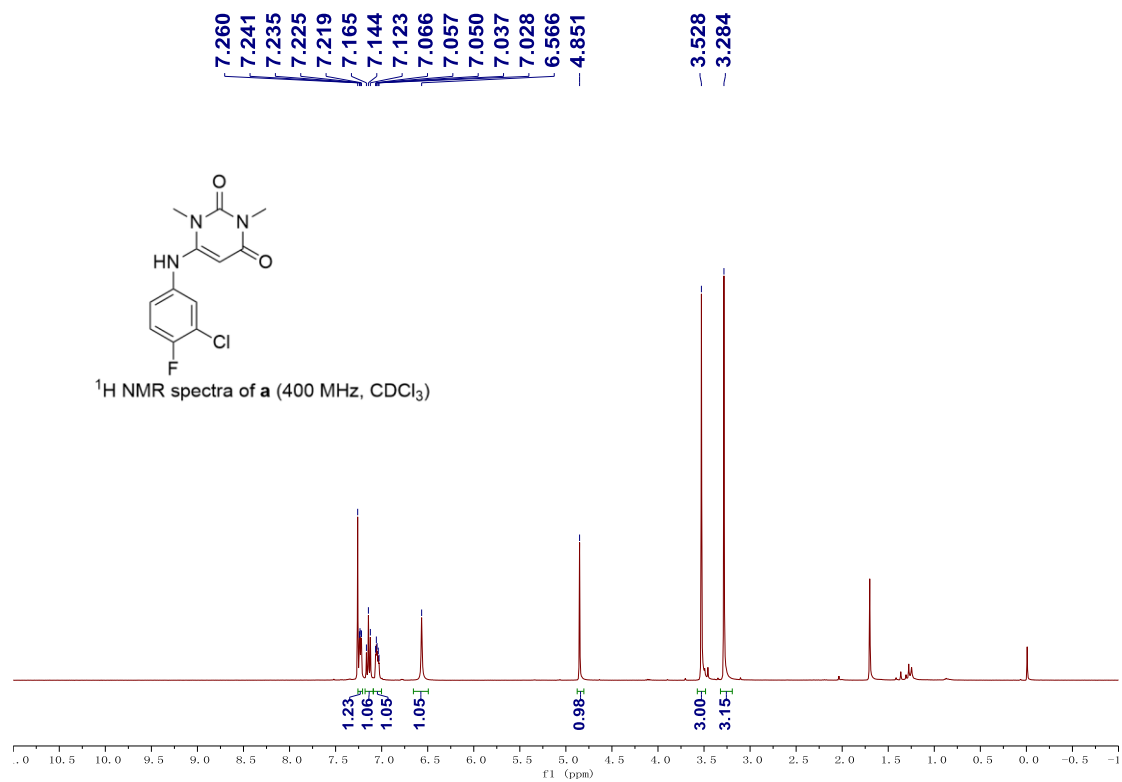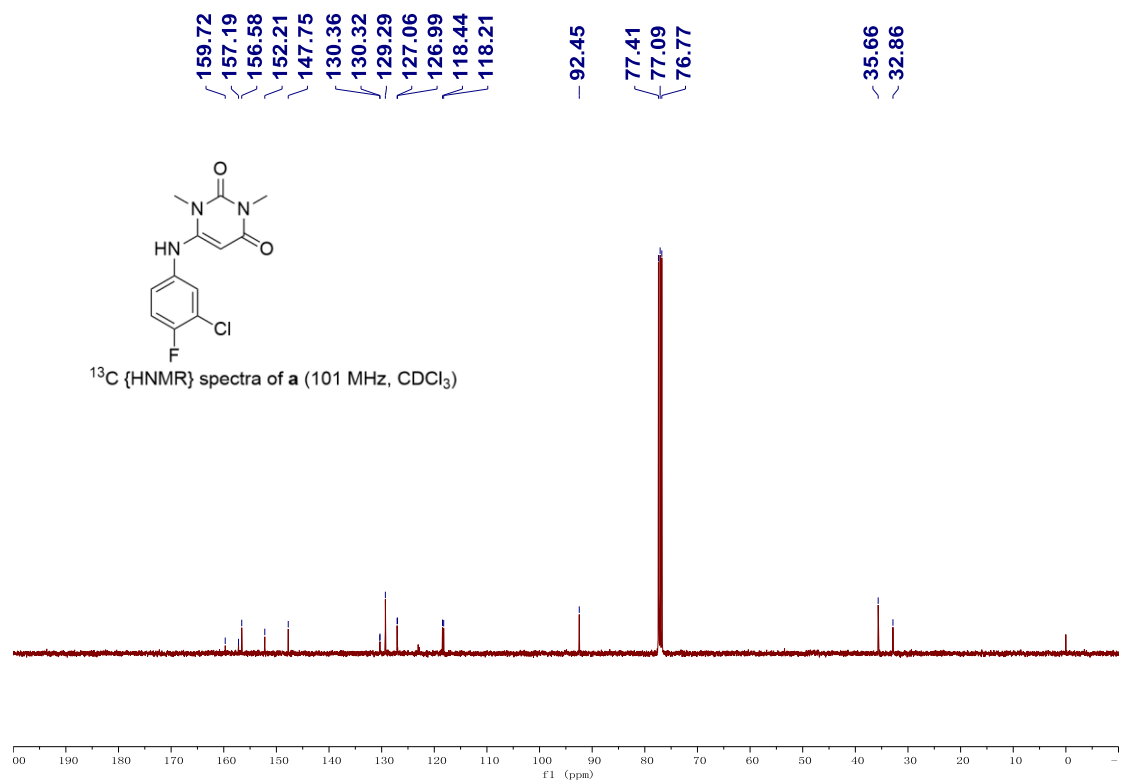

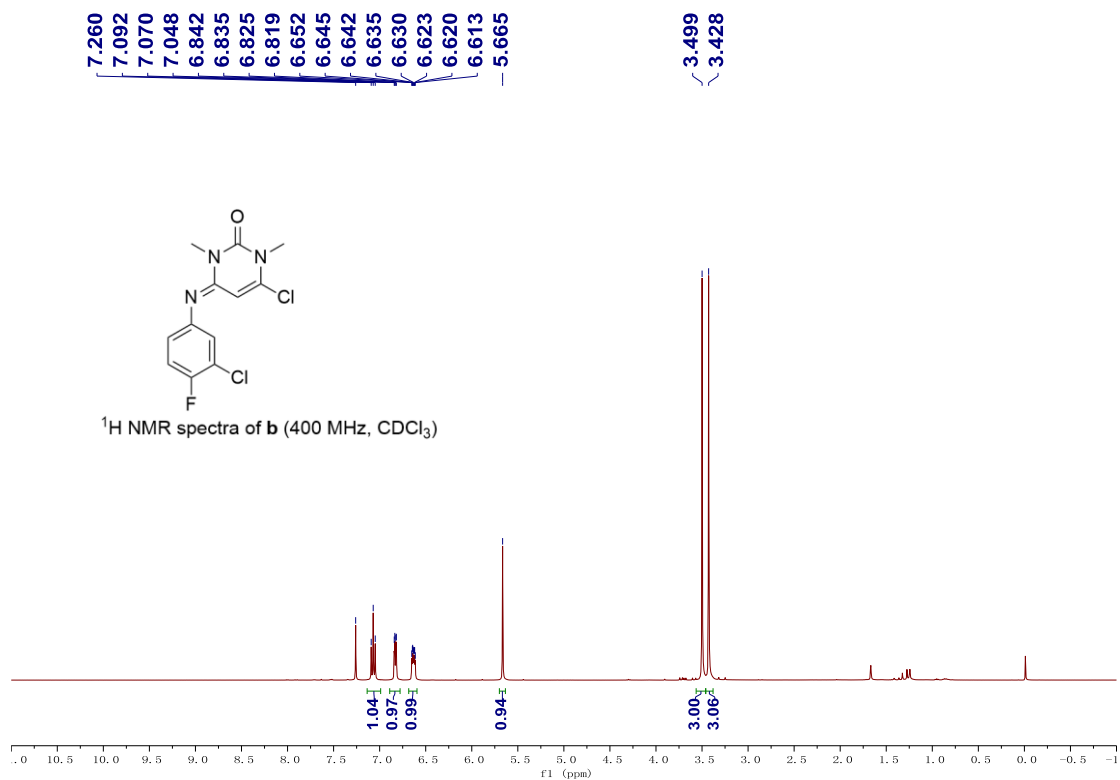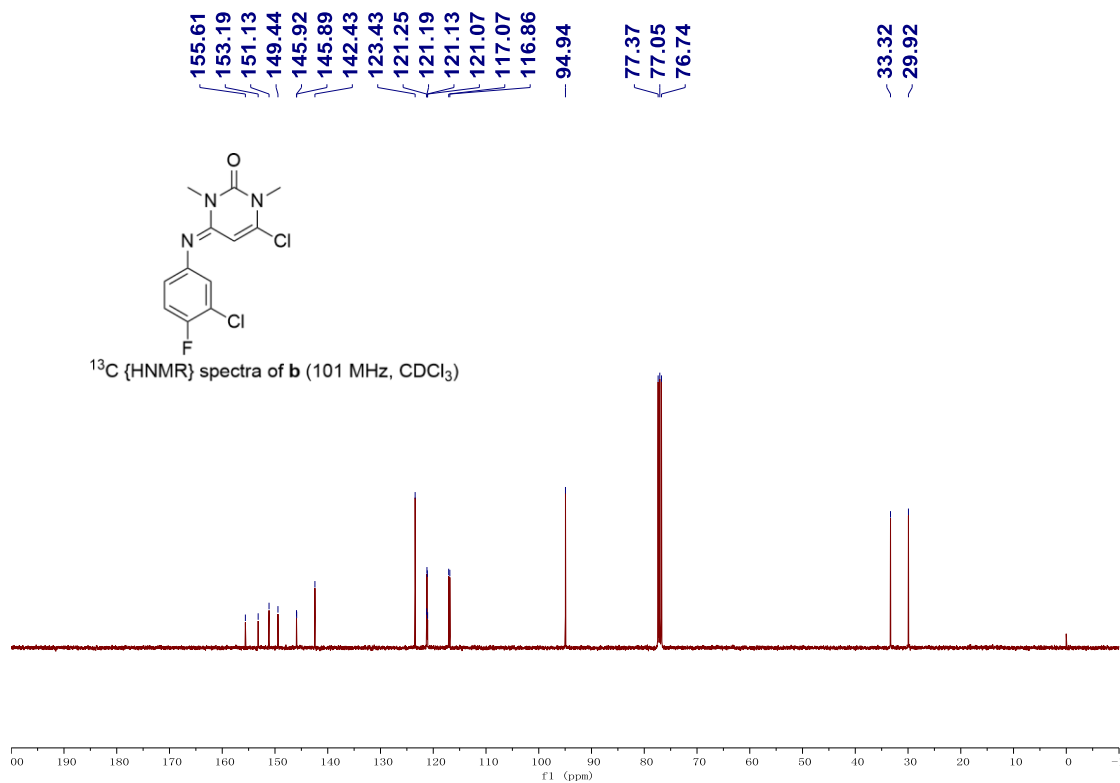



7.260  
7.062  
7.040  
7.018  
6.838  
6.831  
6.821  
6.815  
6.661  
6.655  
6.650  
6.644  
6.639  
6.633  
6.629  
6.337  
6.332  
6.329  
6.324  
6.078  
4.768  
4.588  
4.076  
4.064  
3.412  
3.356

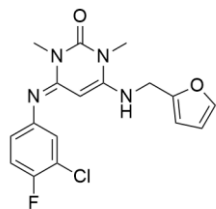

<sup>1</sup>H NMR spectra of 1 (400 MHz, CDCl<sub>3</sub>)

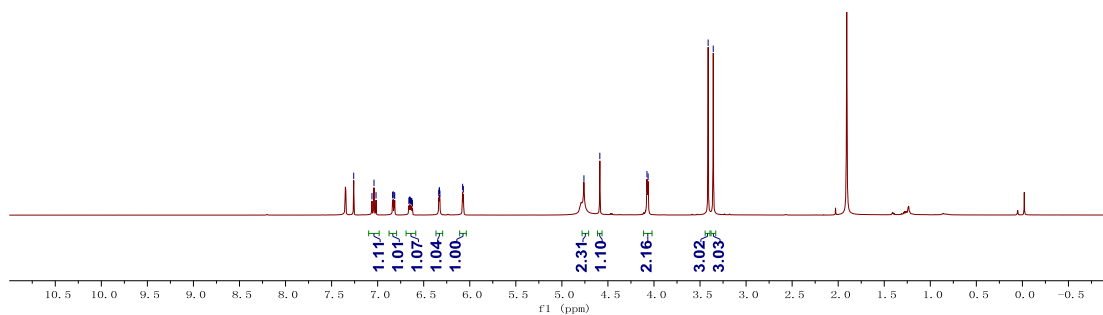

154.89  
152.49  
152.36  
152.34  
151.74  
149.45  
149.30  
148.01  
147.98  
142.69  
124.01  
122.03  
121.97  
120.72  
120.53  
116.78  
116.57  
110.55  
108.80  
77.38  
77.06  
76.74  
70.31  
40.01  
29.45  
28.54

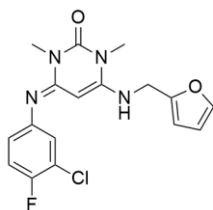

<sup>13</sup>C {HNMR} spectra of 1 (101 MHz, CDCl<sub>3</sub>)

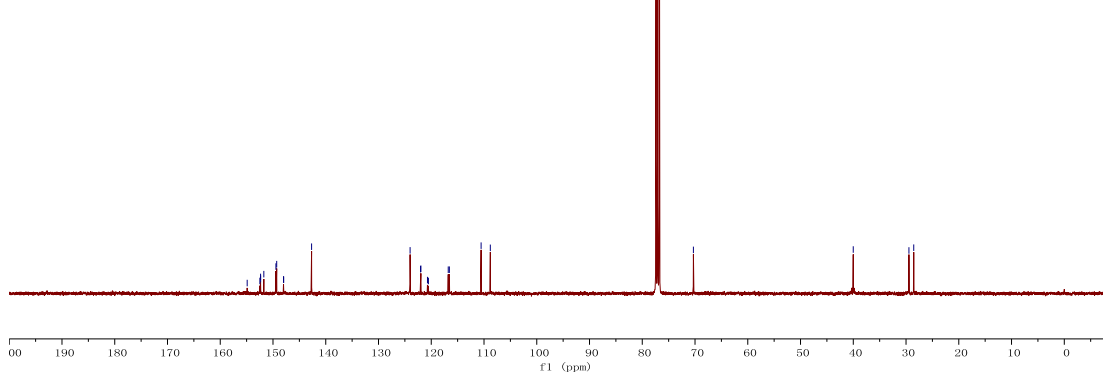

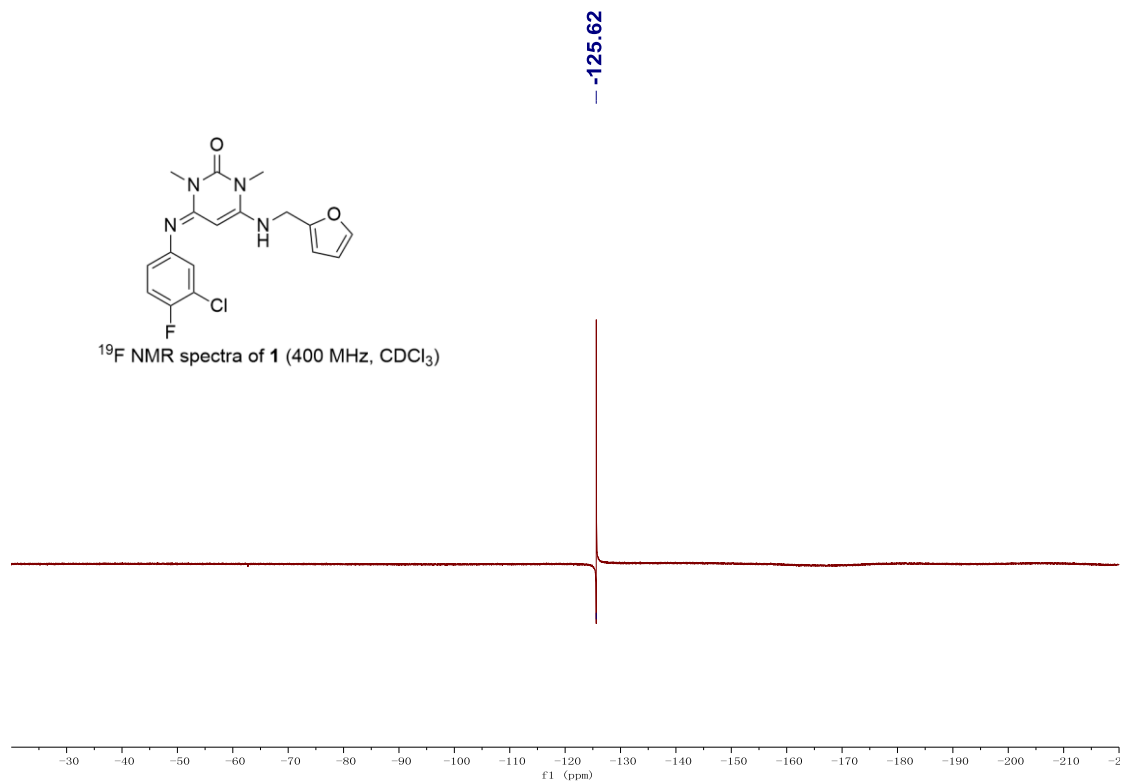

20220104-pos-10 #15 RT: 0.11 AV: 1 NL: 8.36E6  
 T: FTMS + p ESI Full ms [200.0000-800.0000]

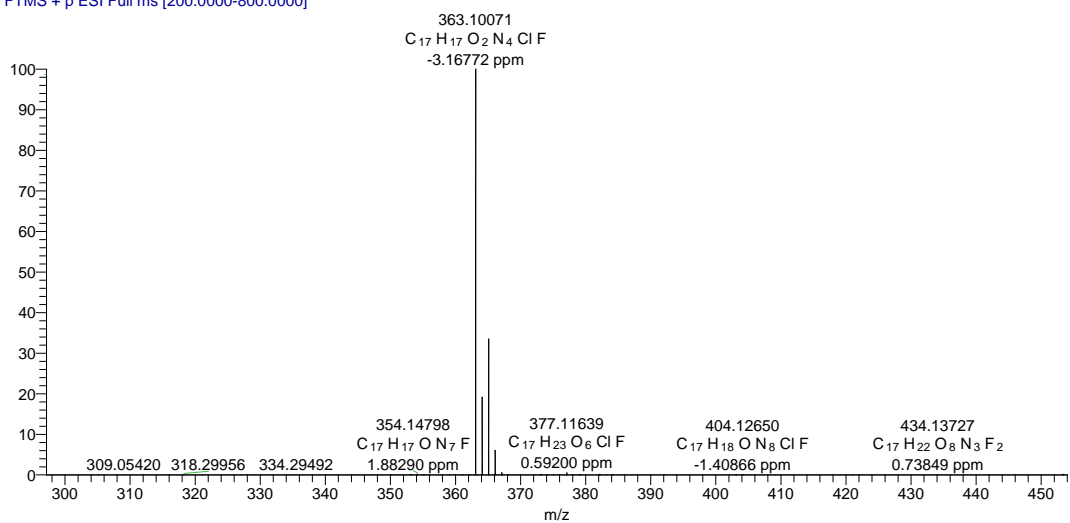

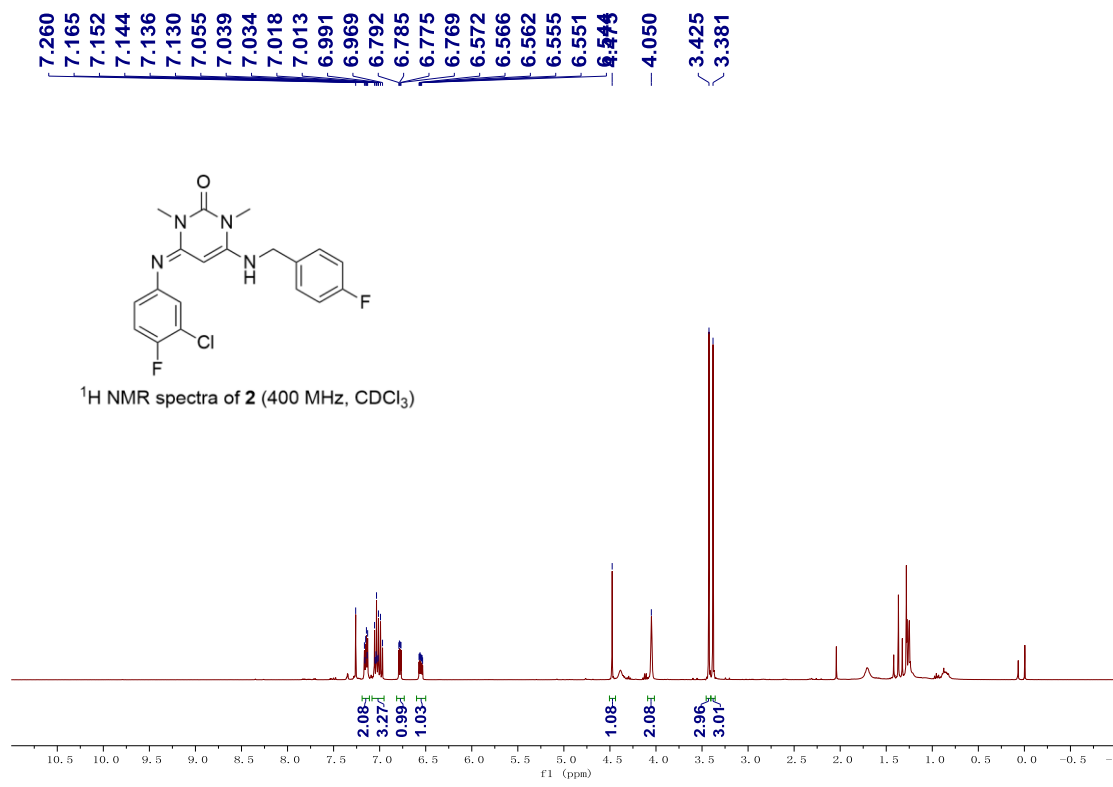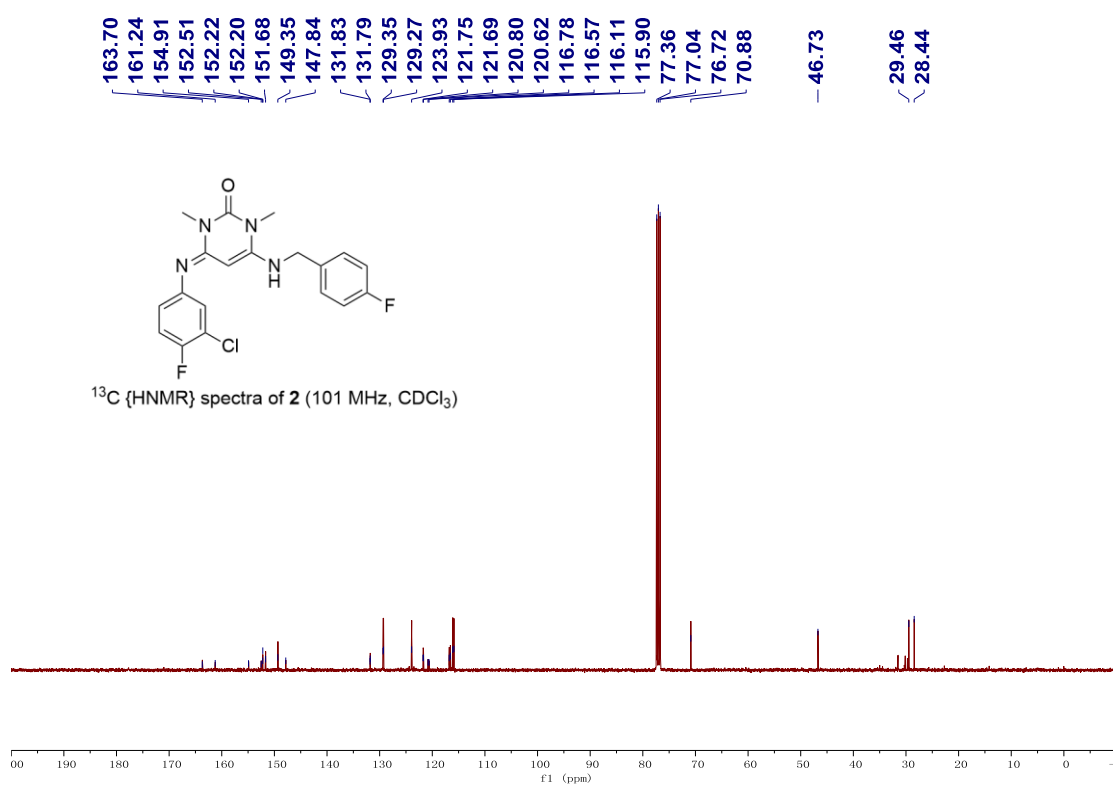

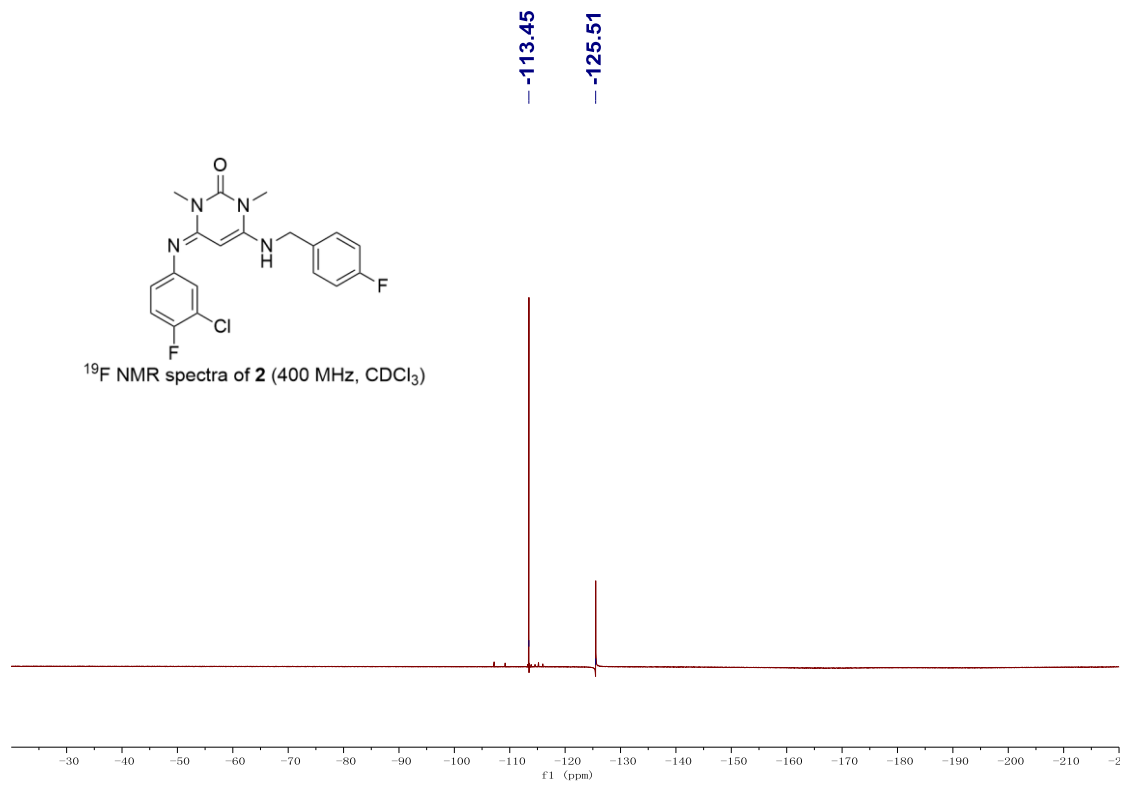

6.

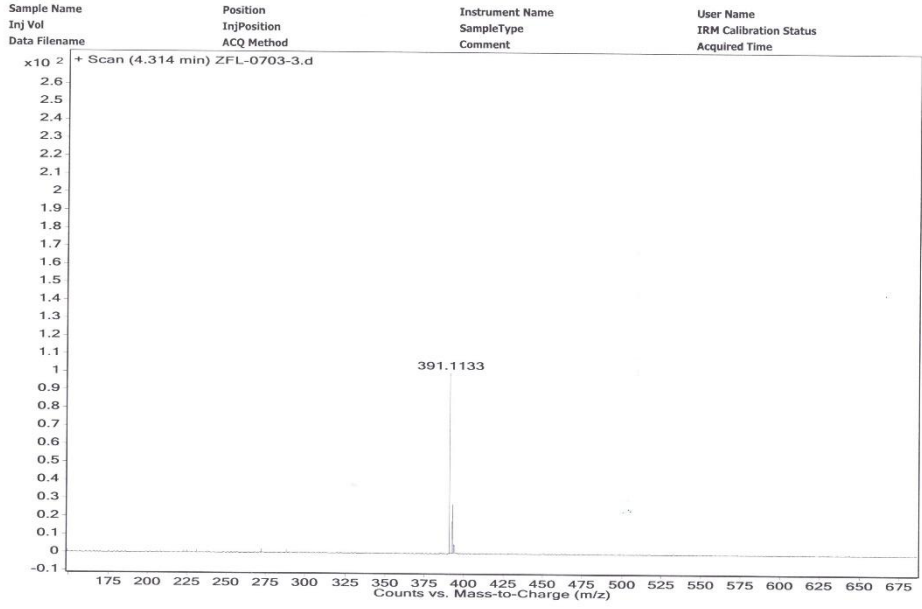

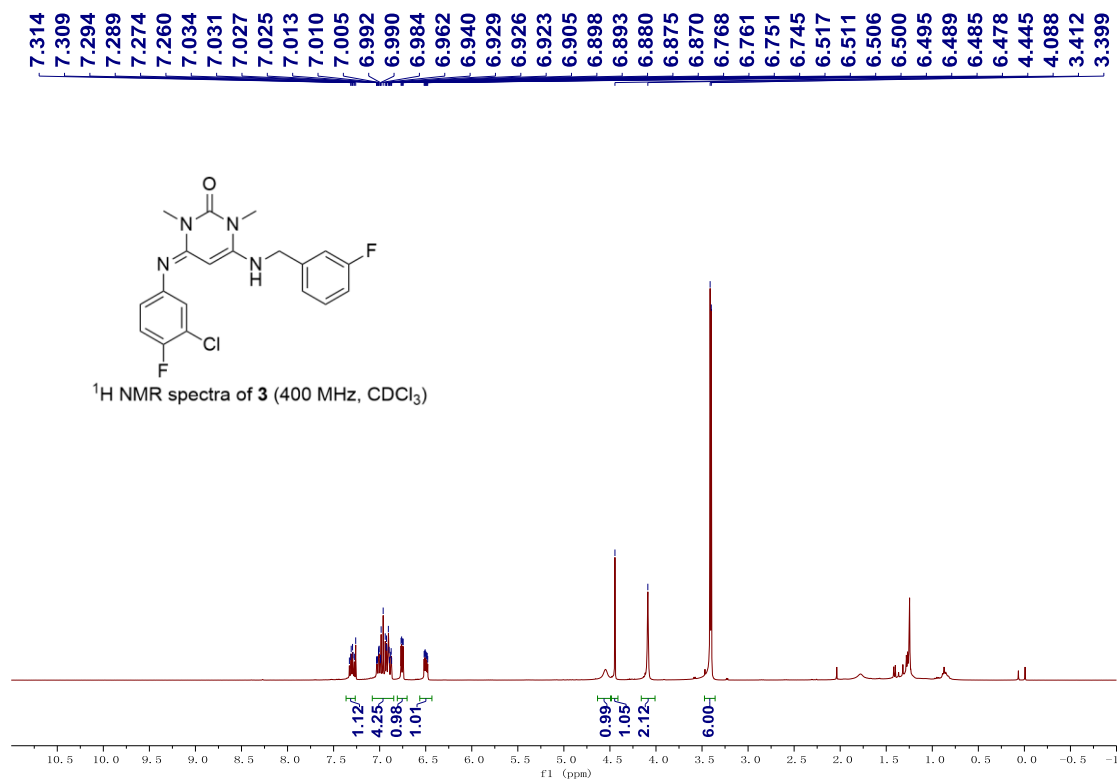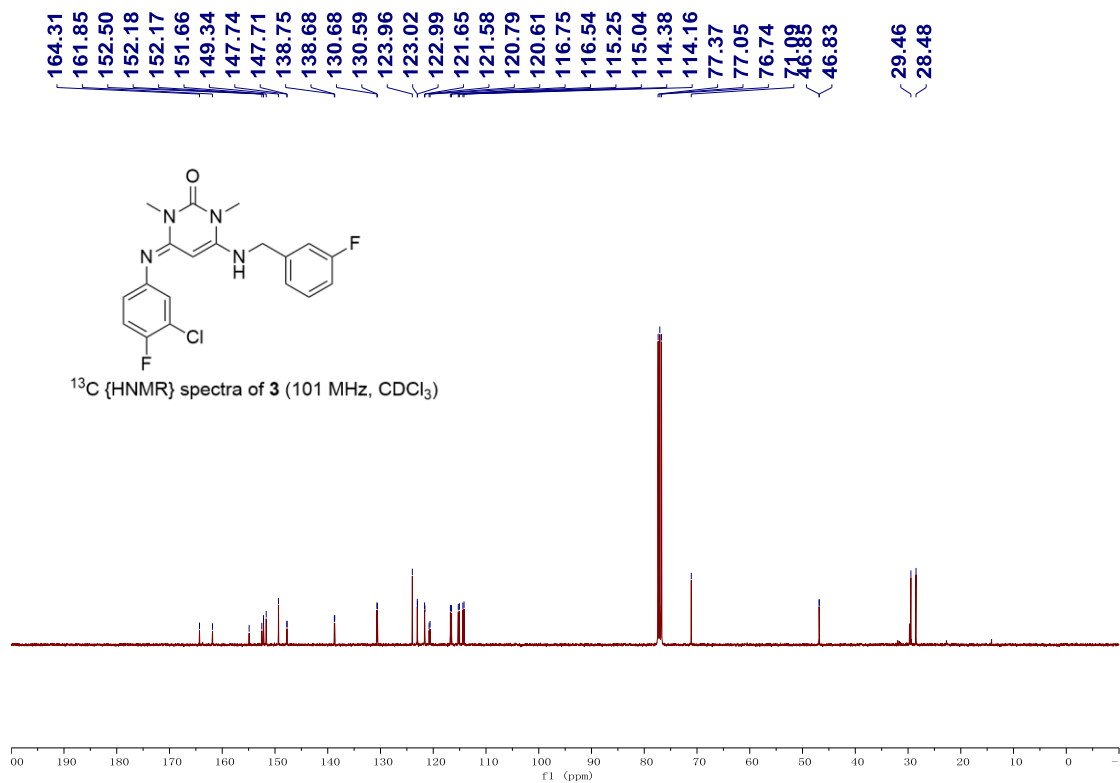

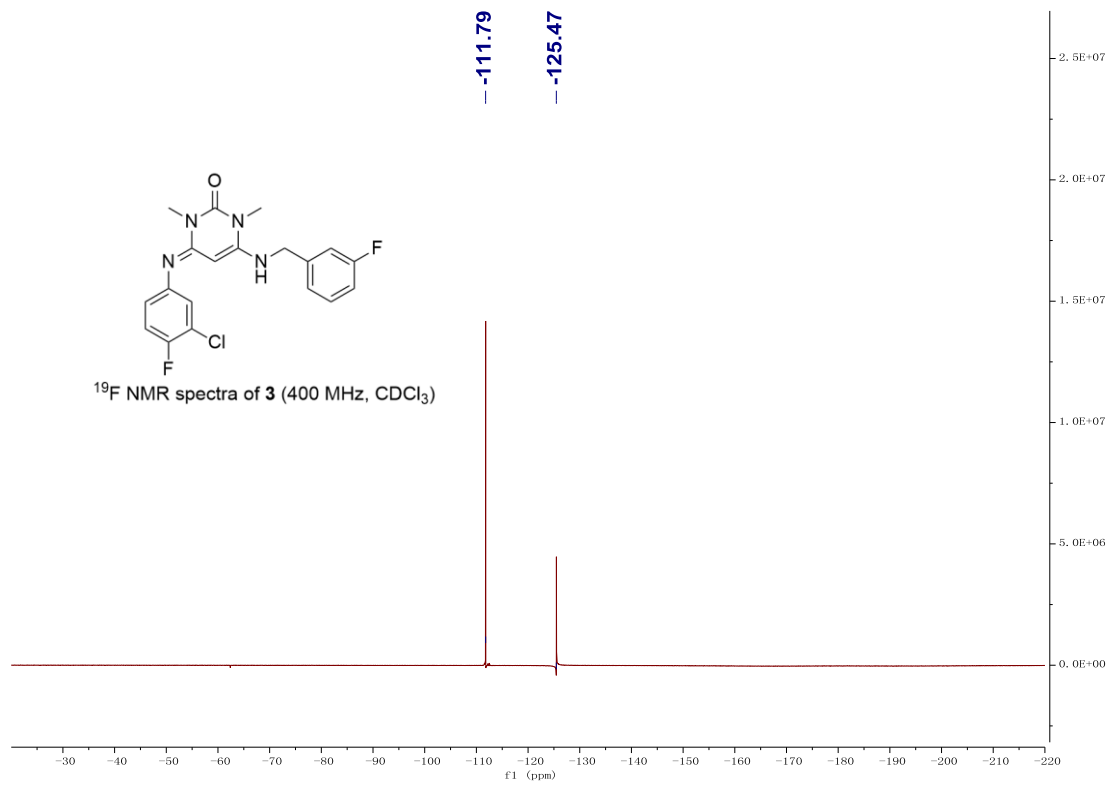

3

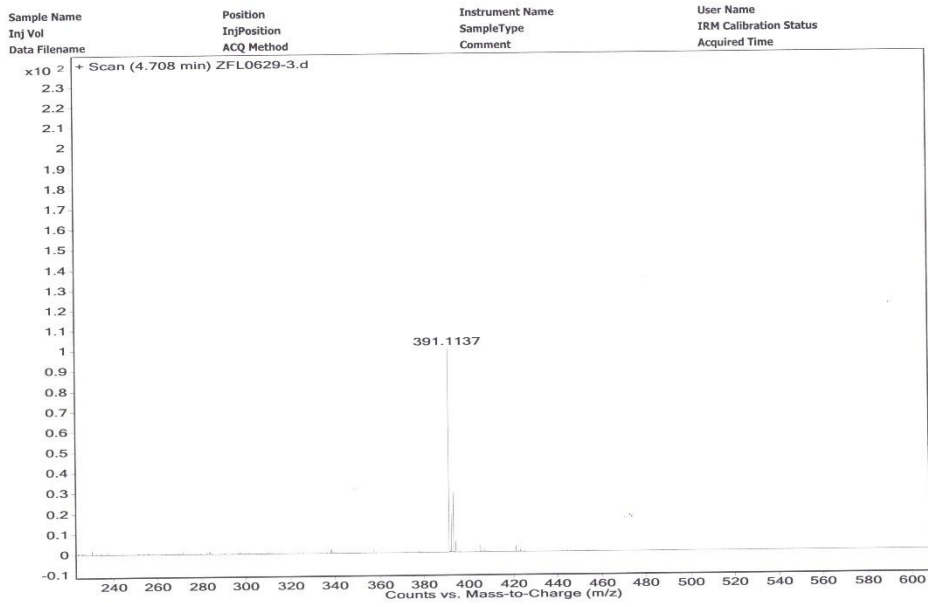



7.338  
7.331  
7.326  
7.315  
7.310  
7.304  
7.260  
7.123  
7.116  
7.111  
7.099  
7.095  
7.008  
6.986  
6.964  
6.961  
6.787  
6.781  
6.770  
6.764  
6.554  
6.548  
6.544  
6.539  
6.535  
4.064  
3.429  
3.393

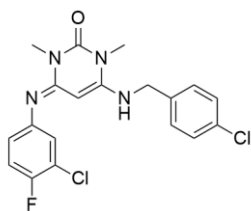

<sup>1</sup>H NMR spectra of **4** (400 MHz, CDCl<sub>3</sub>)

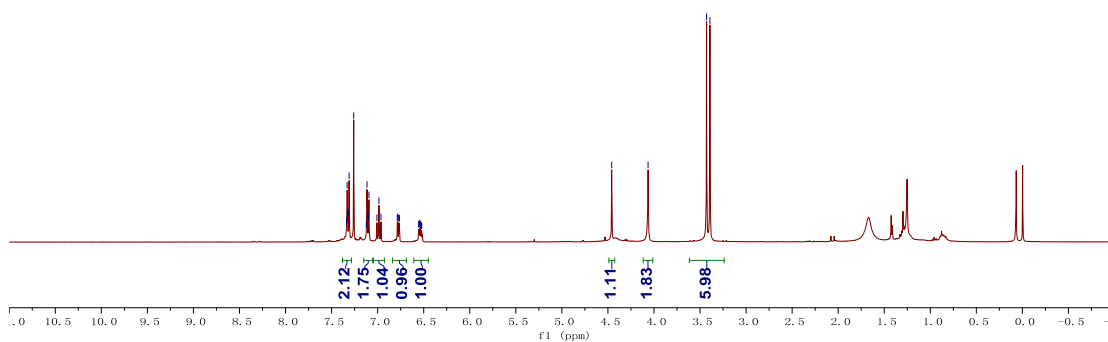

154.95  
152.55  
152.16  
151.61  
149.36  
147.62  
147.58  
134.52  
134.10  
129.23  
128.81  
123.95  
121.75  
121.68  
120.84  
120.65  
116.77  
116.56  
77.34  
77.02  
76.70  
71.04  
46.75  
29.48  
28.46

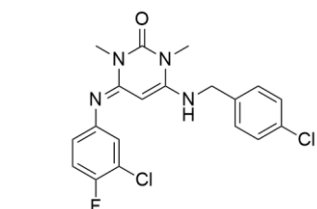

<sup>13</sup>C {HNMR} spectra of **4** (101 MHz, CDCl<sub>3</sub>)

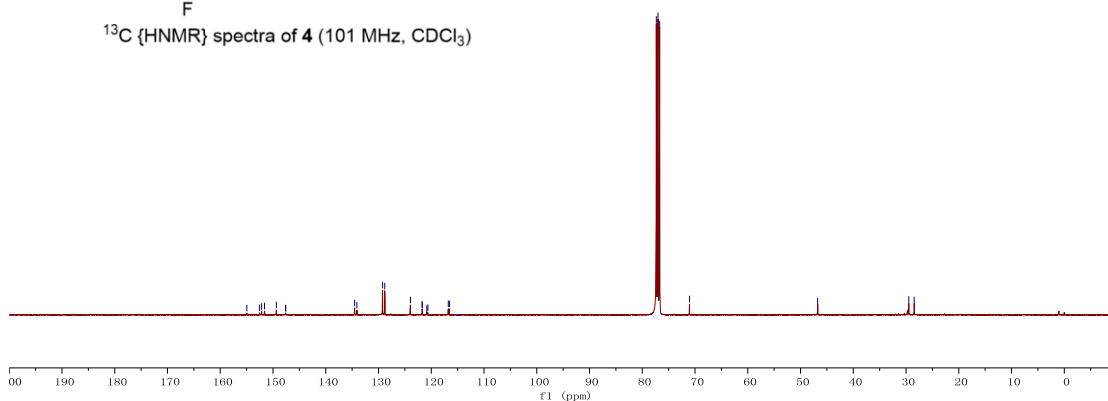

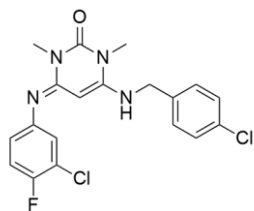

<sup>19</sup>F NMR spectra of **4** (400 MHz, CDCl<sub>3</sub>)

--125.34

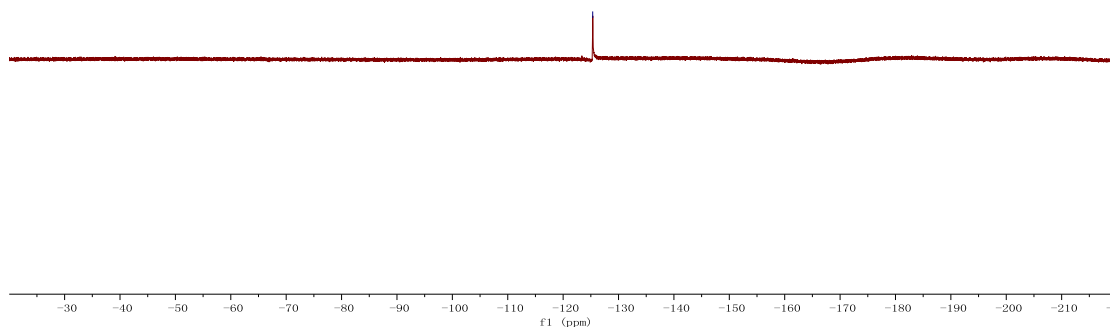

20220104-pos-8 #28 RT: 0.21 AV: 1 NL: 5.64E6  
T: FTMS + p ESI Full ms [200.0000-800.0000]

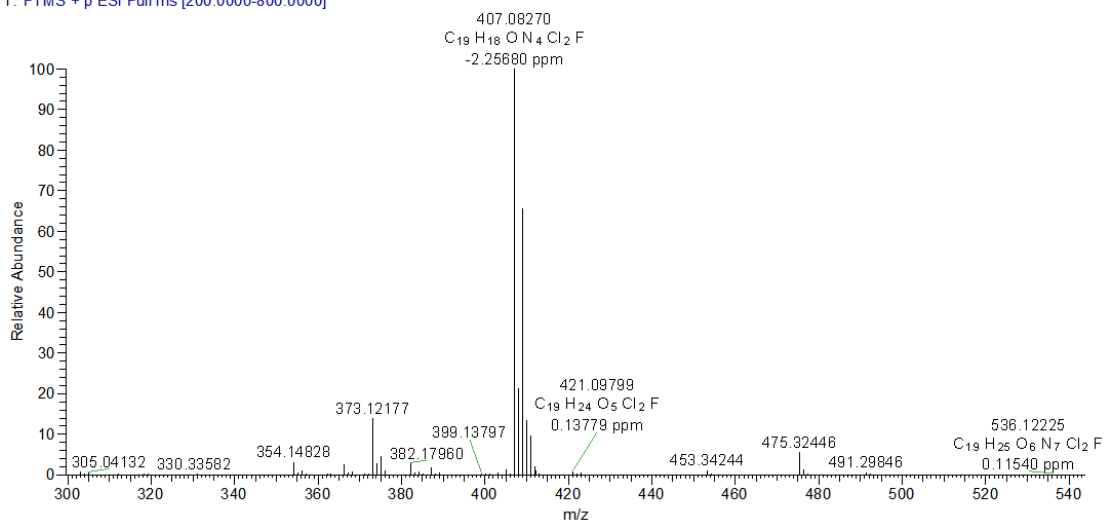

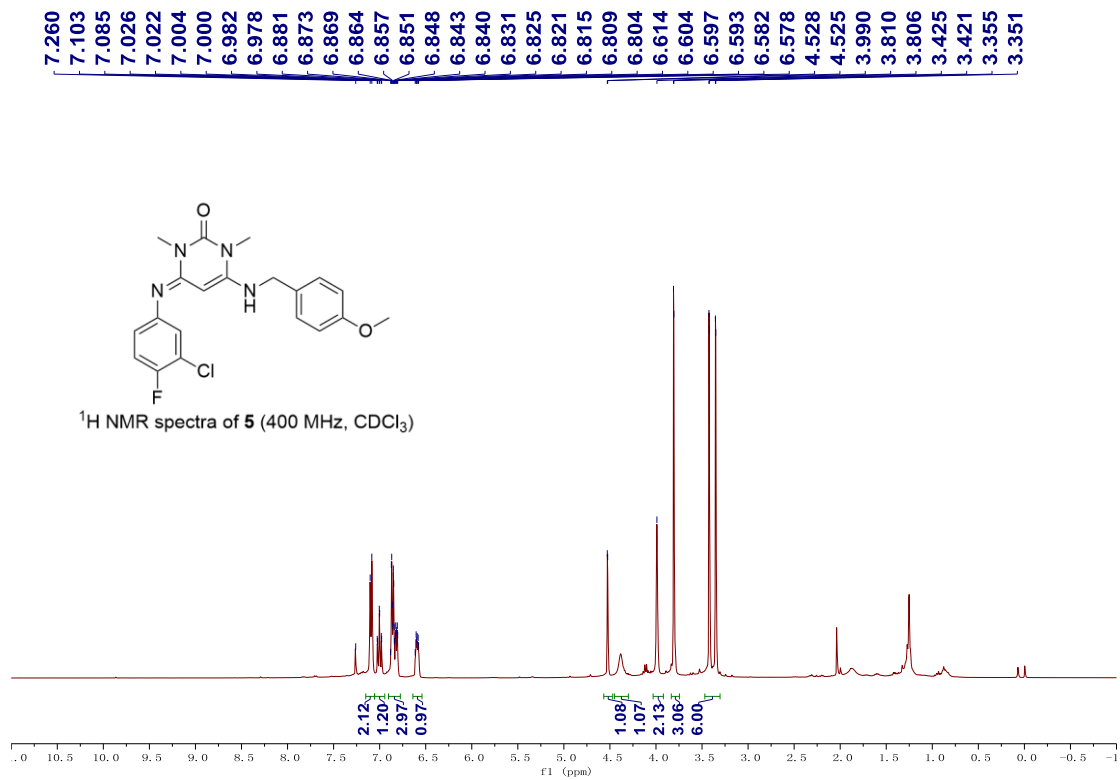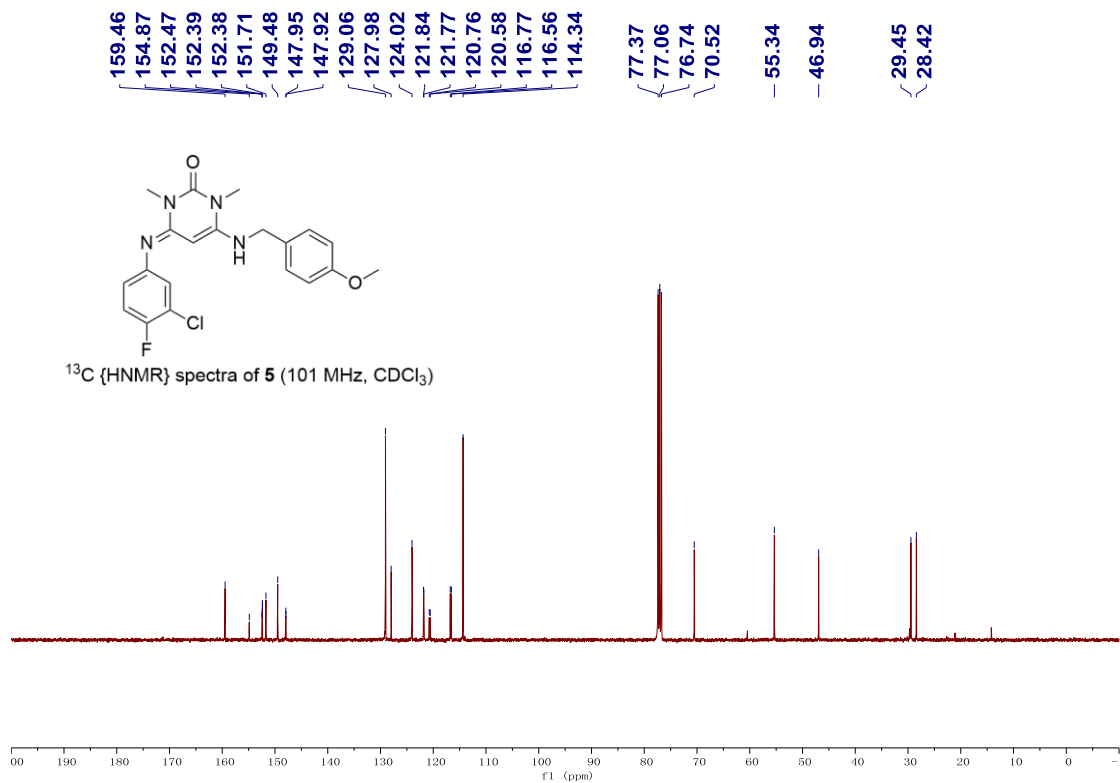

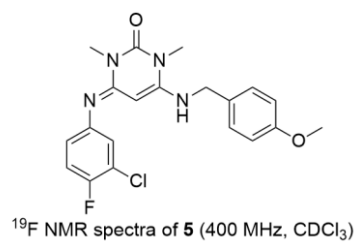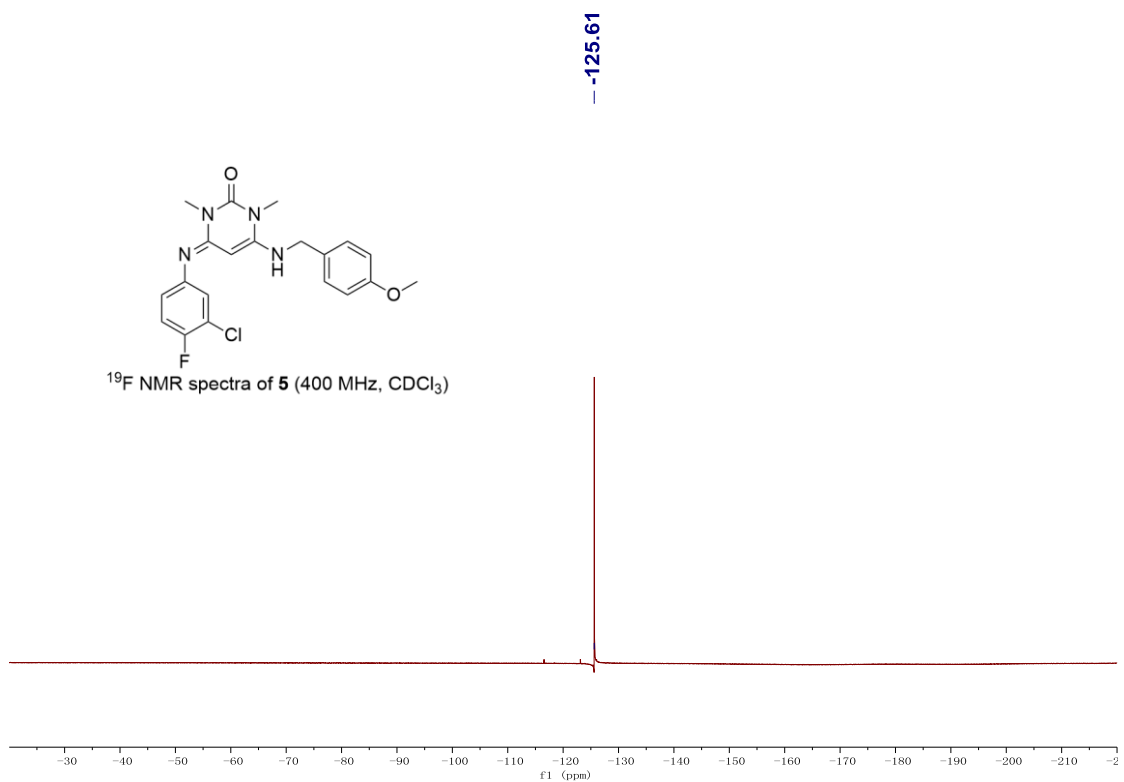

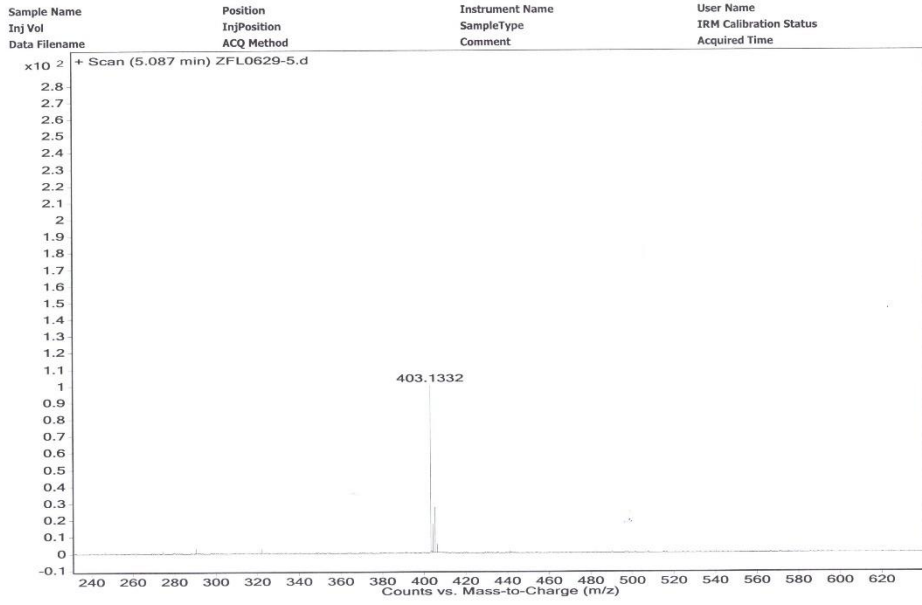

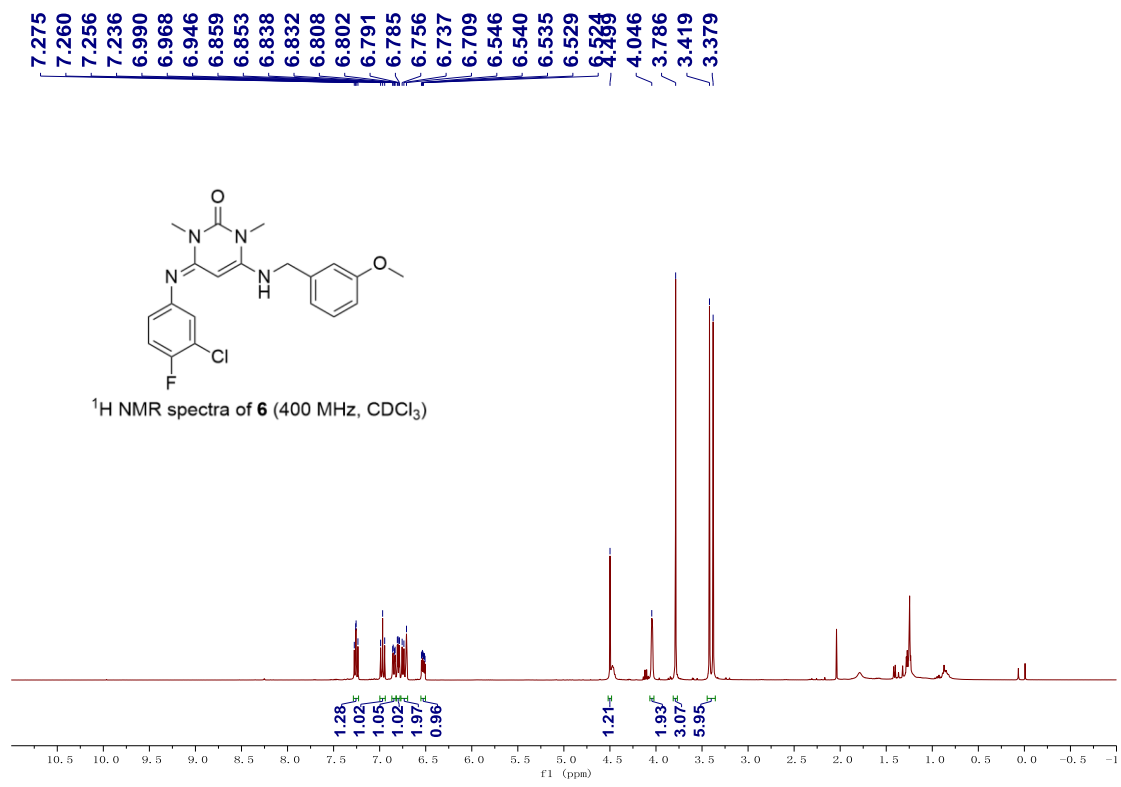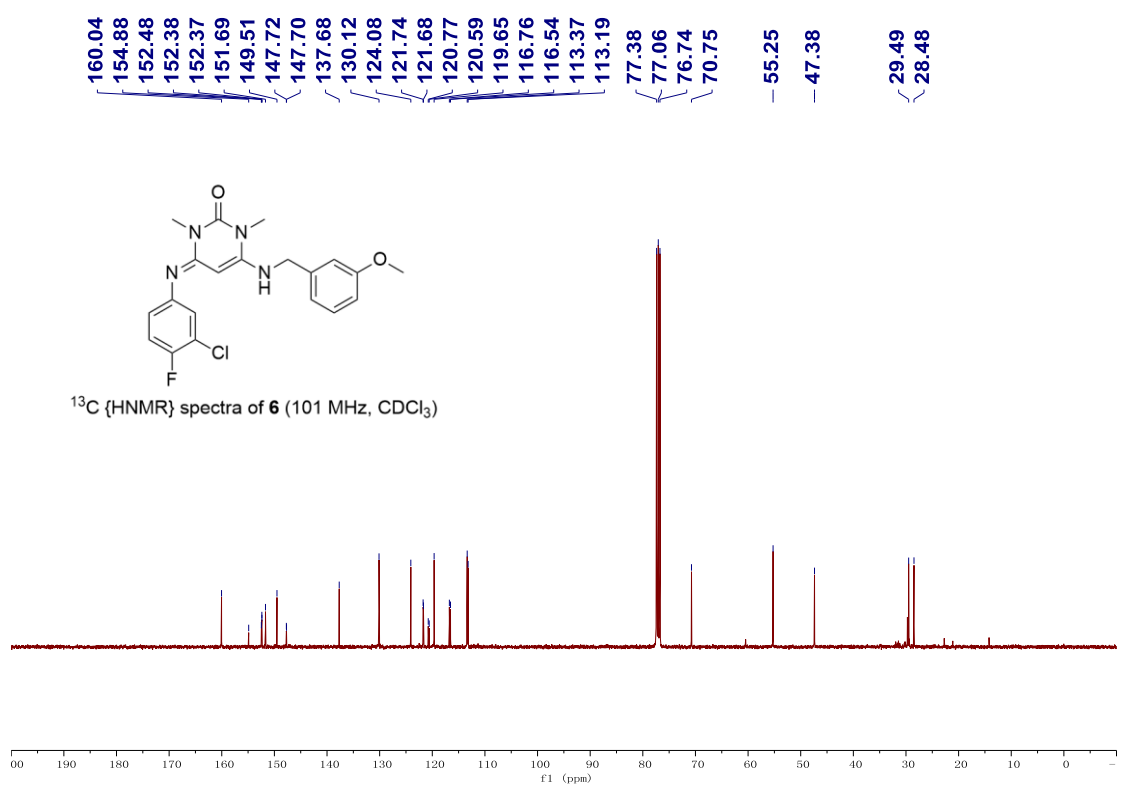

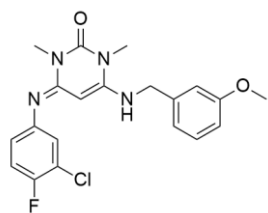

<sup>19</sup>F NMR spectra of **6** (400 MHz, CDCl<sub>3</sub>)

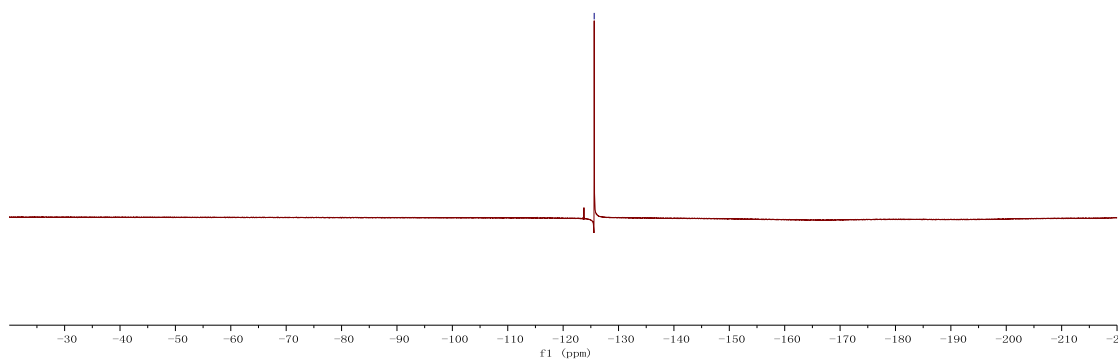

18.

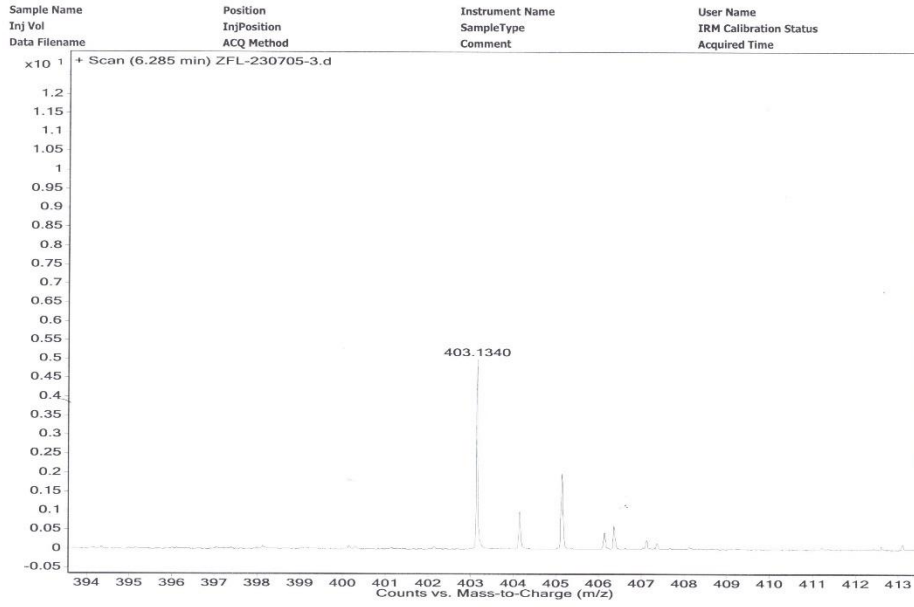



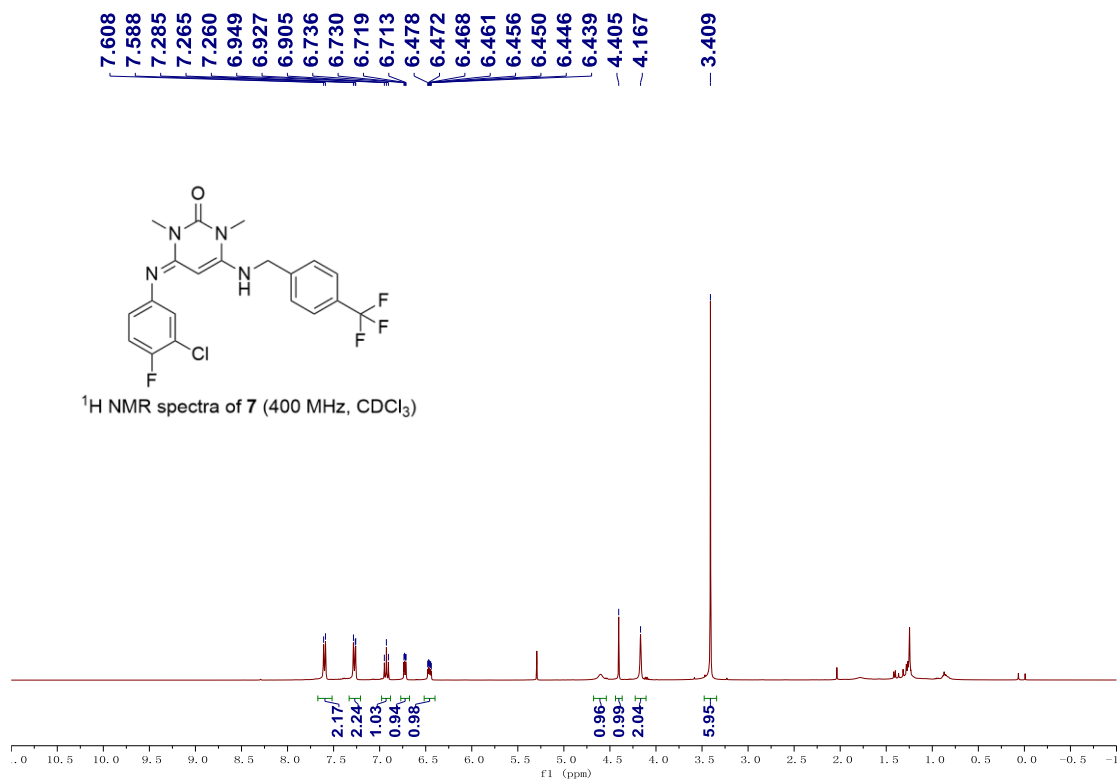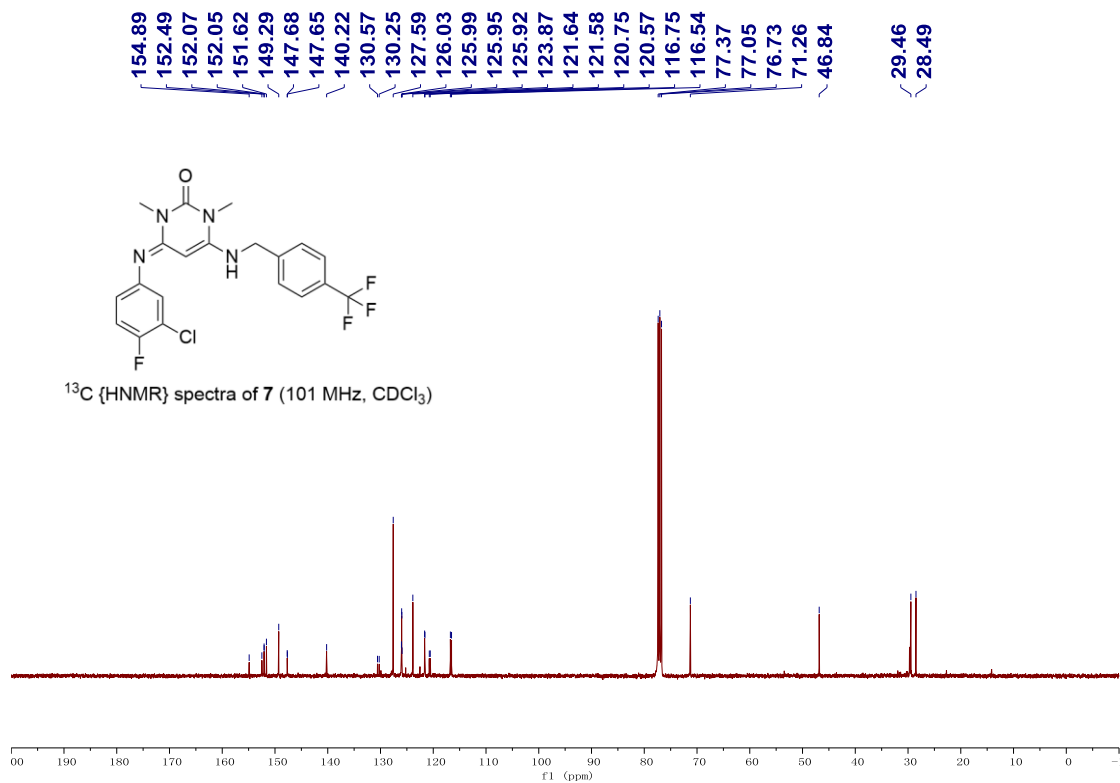

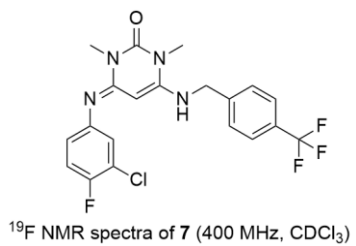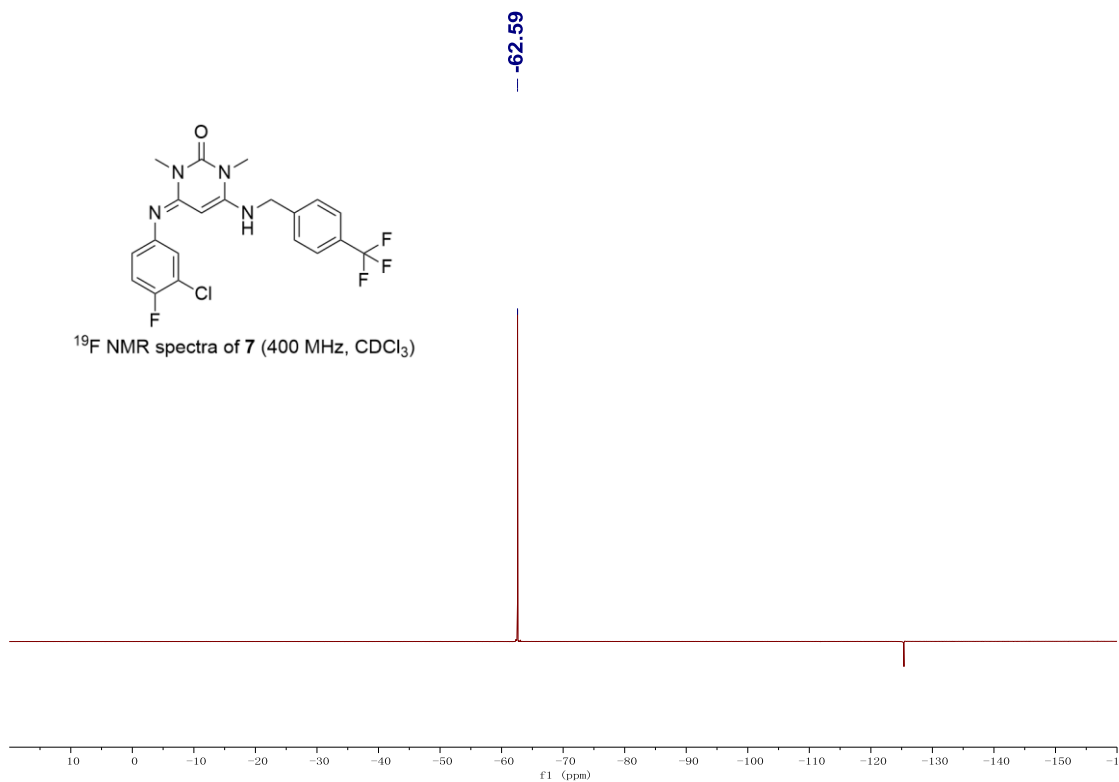

4.

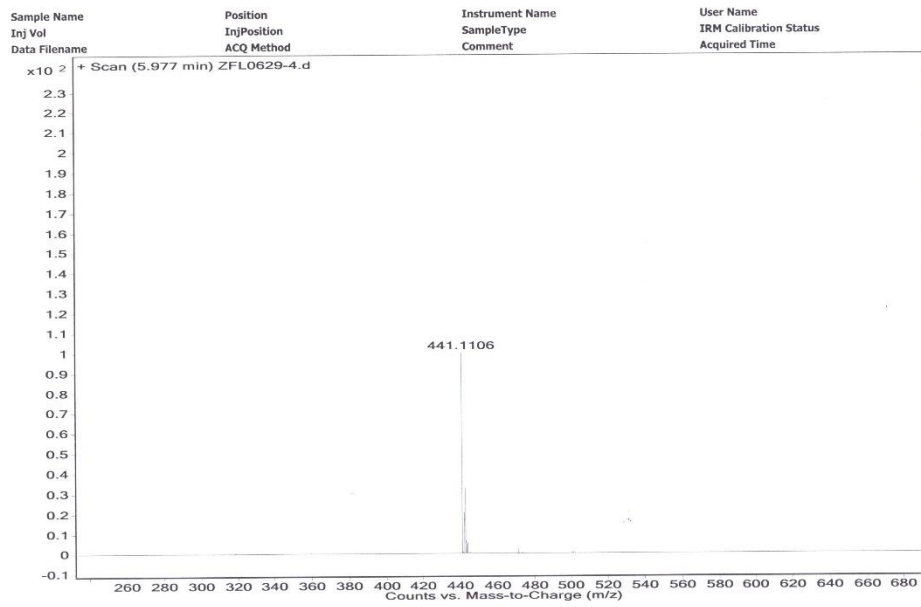

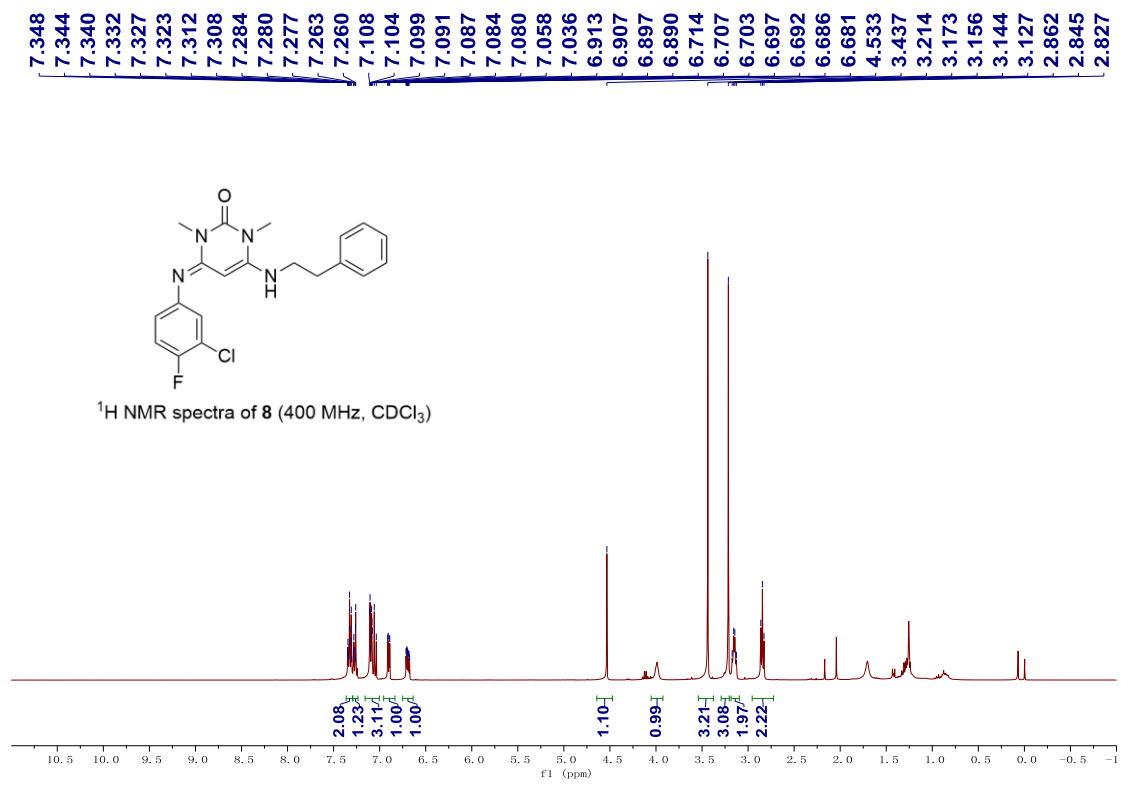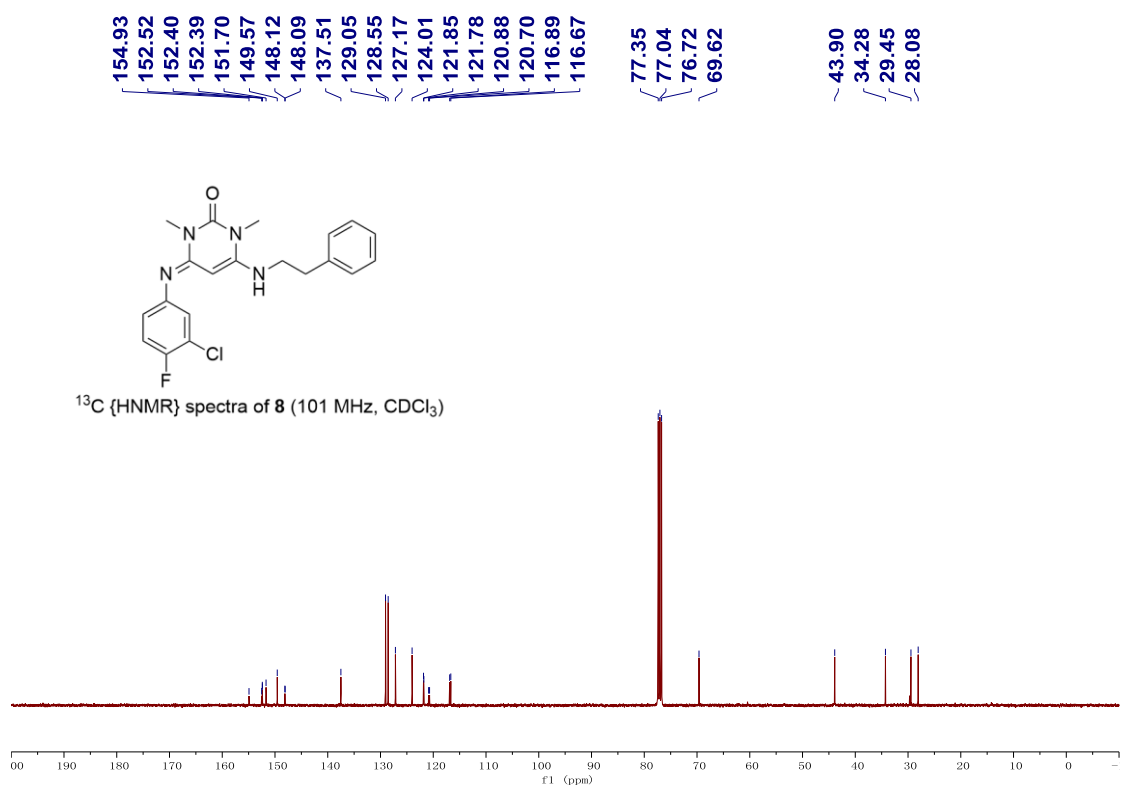

--125.64

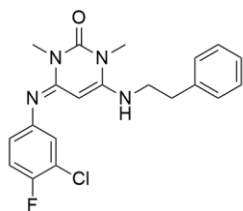

<sup>19</sup>F NMR spectra of **8** (400 MHz, CDCl<sub>3</sub>)

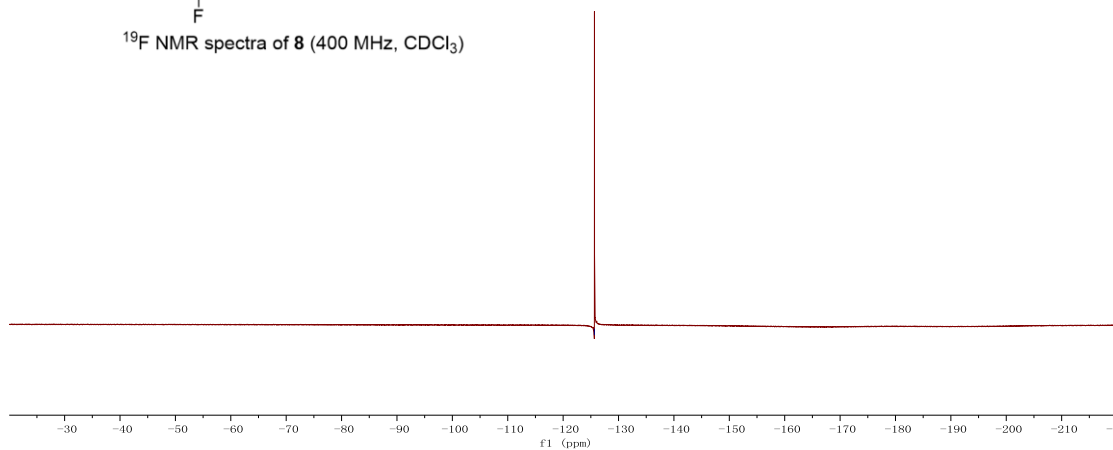

20220104-pos-7 #37 RT: 0.27 AV: 1 NL: 4.85E6  
T: FTMS + p ESI Full ms [200.0000-800.0000]

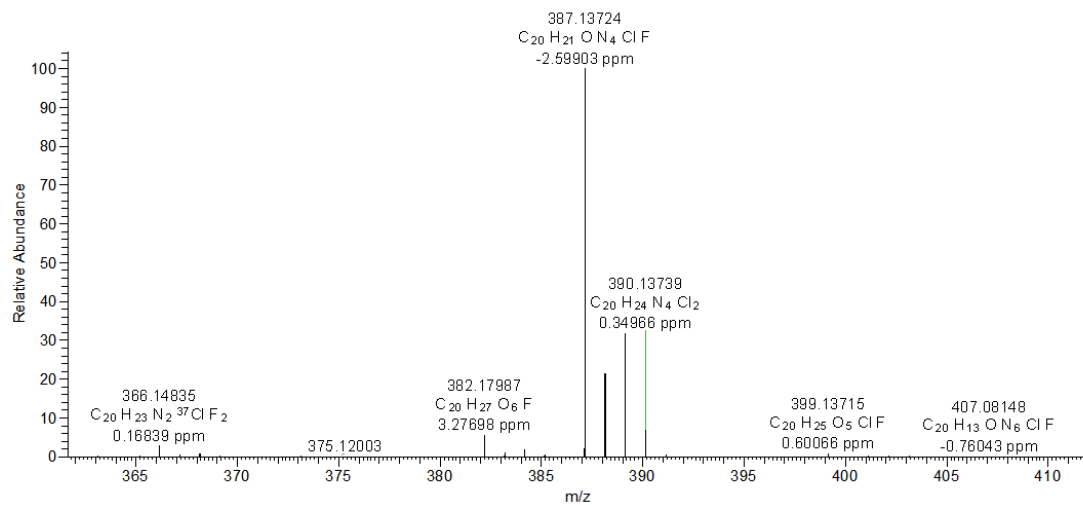

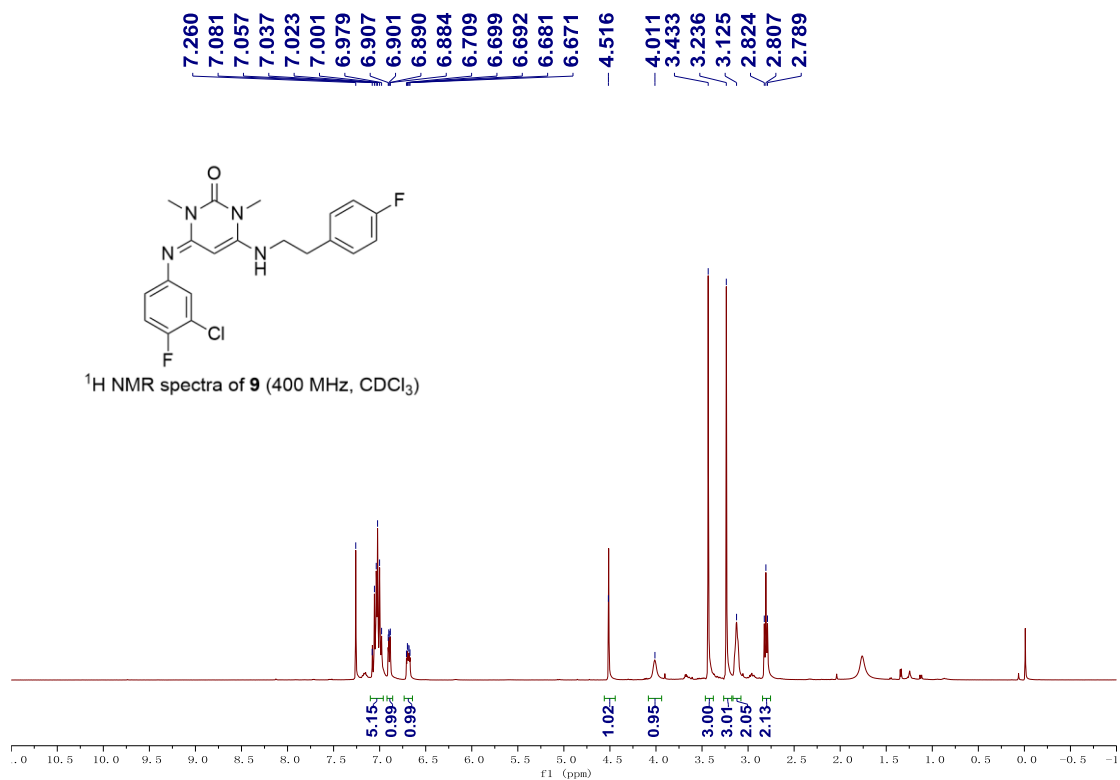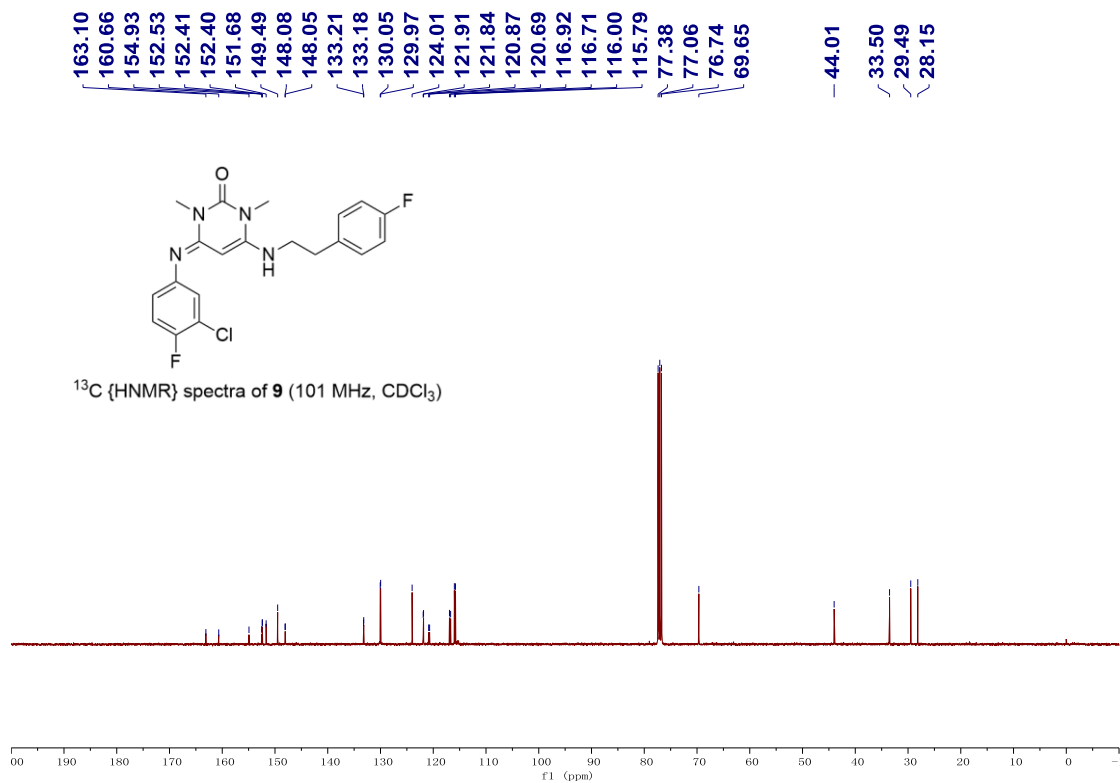

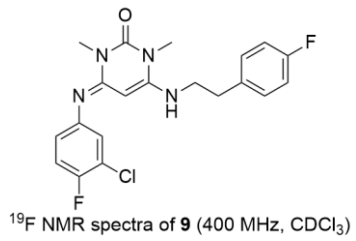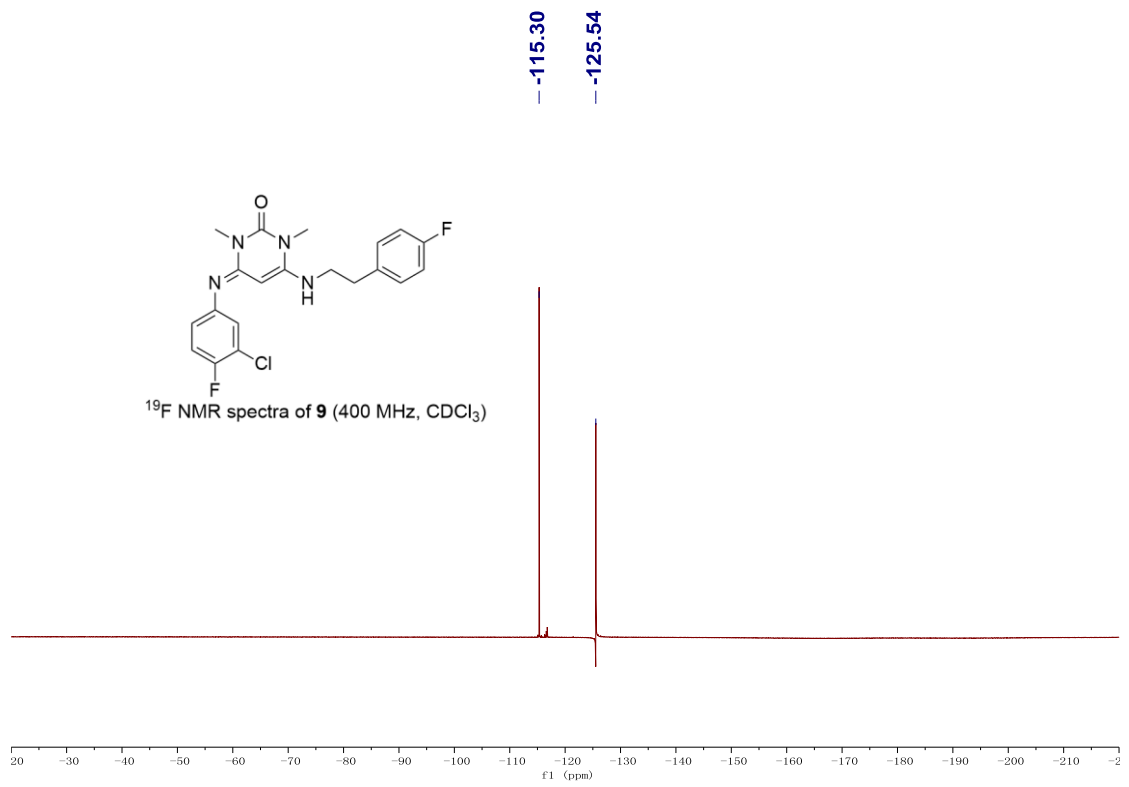

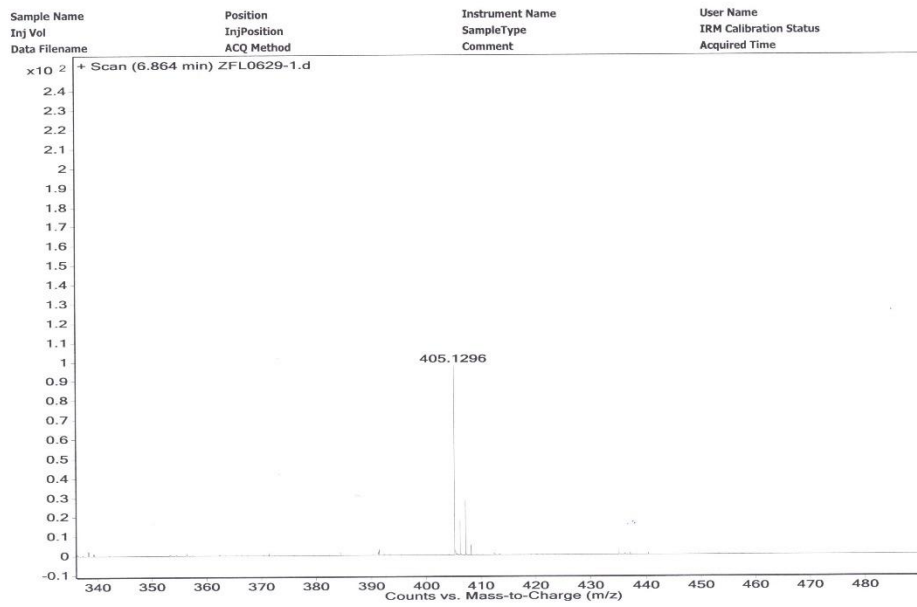



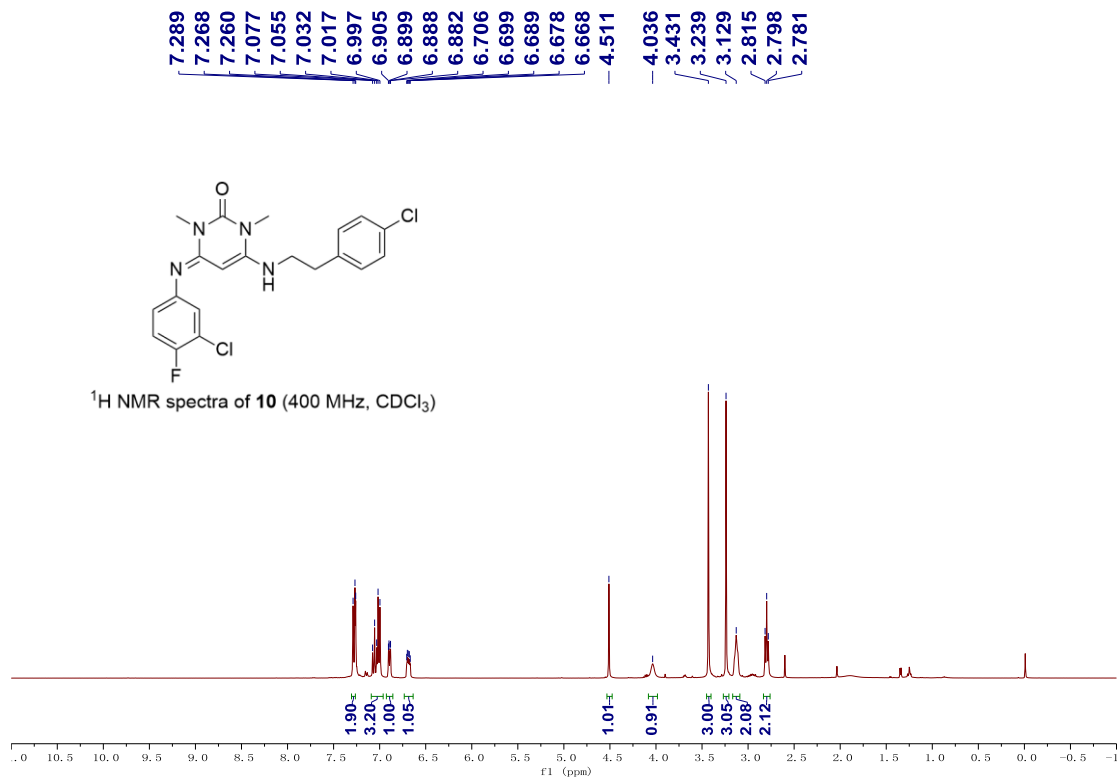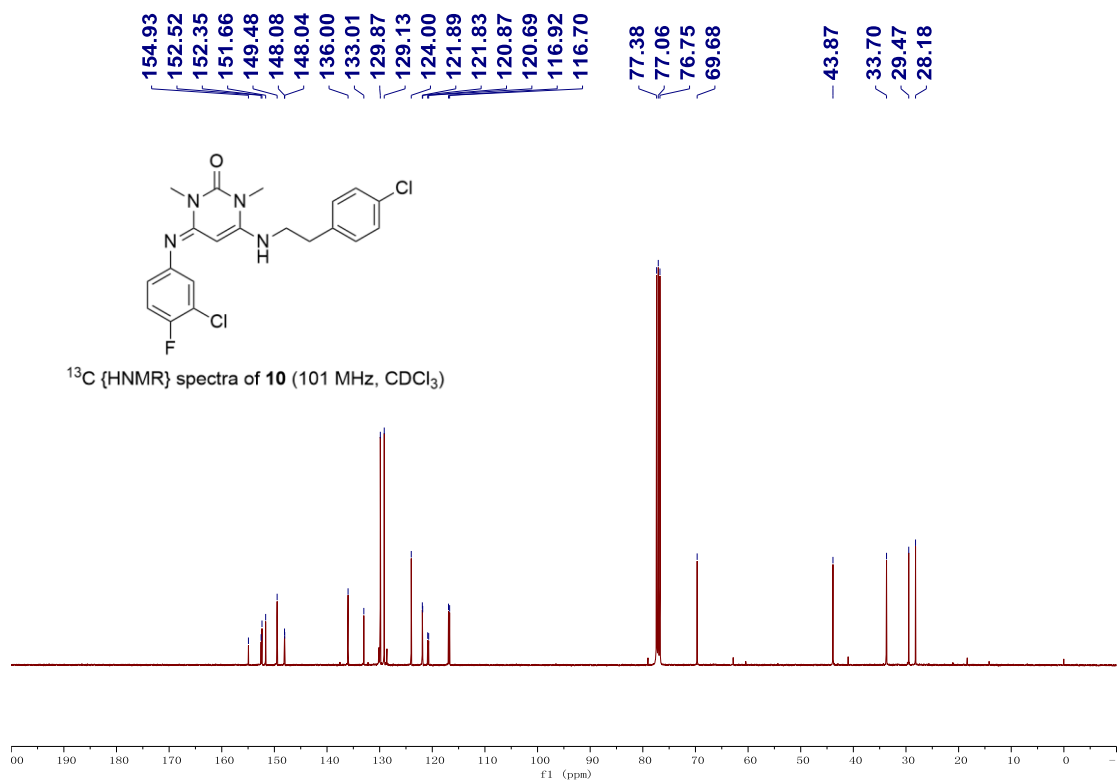

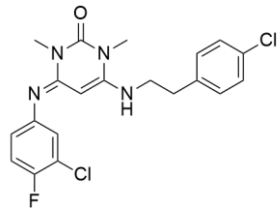

<sup>19</sup>F NMR spectra of **10** (400 MHz, CDCl<sub>3</sub>)

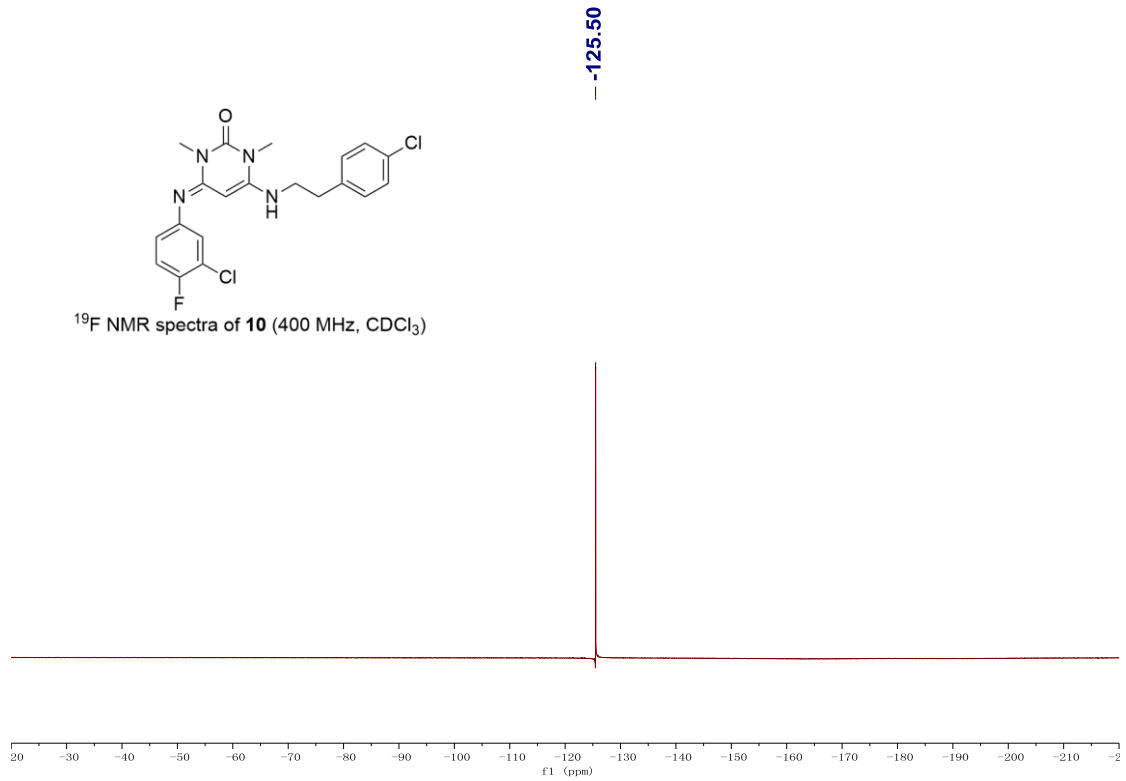

20220104-pos-13 #47 RT: 0.33 AV: 1 NL: 9.28E6  
T: FTMS + p ESI Full ms [200.0000-800.0000]

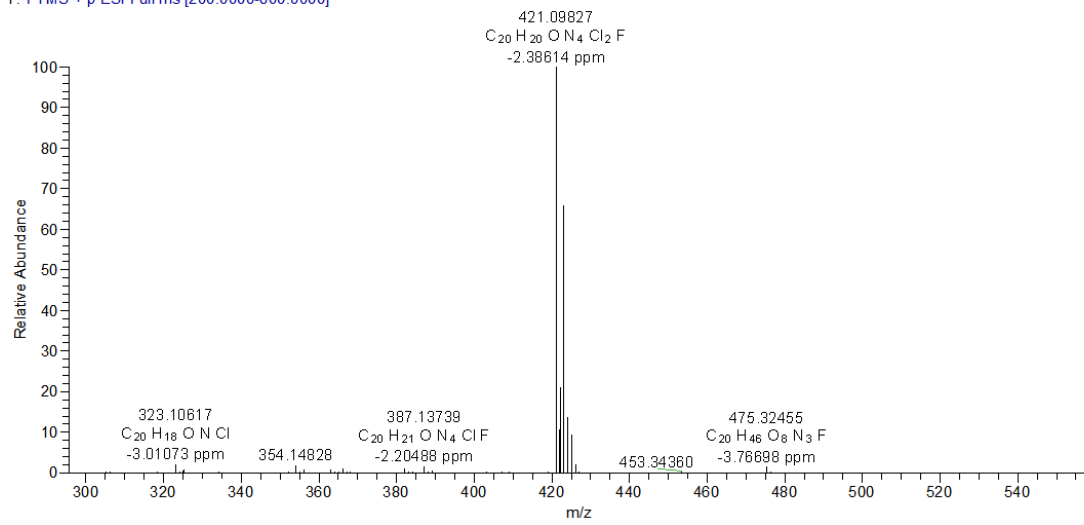



-127.92

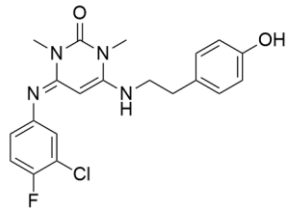

$^{19}\text{F}$  NMR spectra of **11** (400 MHz,  $\text{CDCl}_3$ )

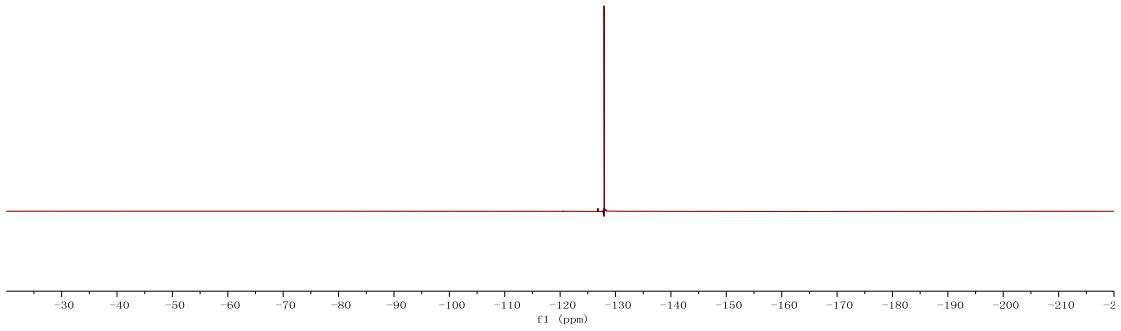

20220104-pos-14 #38 RT: 0.28 AV: 1 NL: 9.83E6  
T: FTMS + p ESI Full ms [200.0000-800.0000]

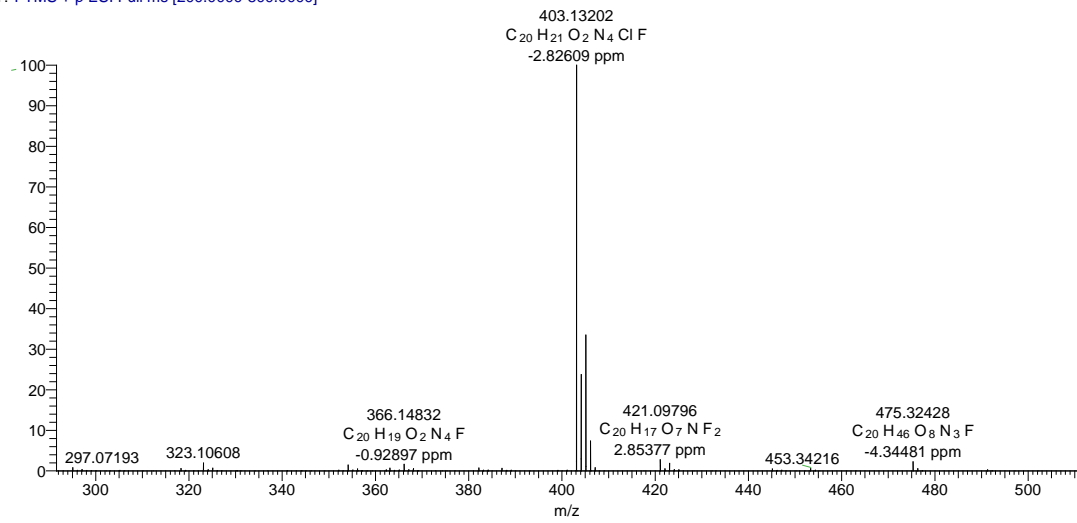

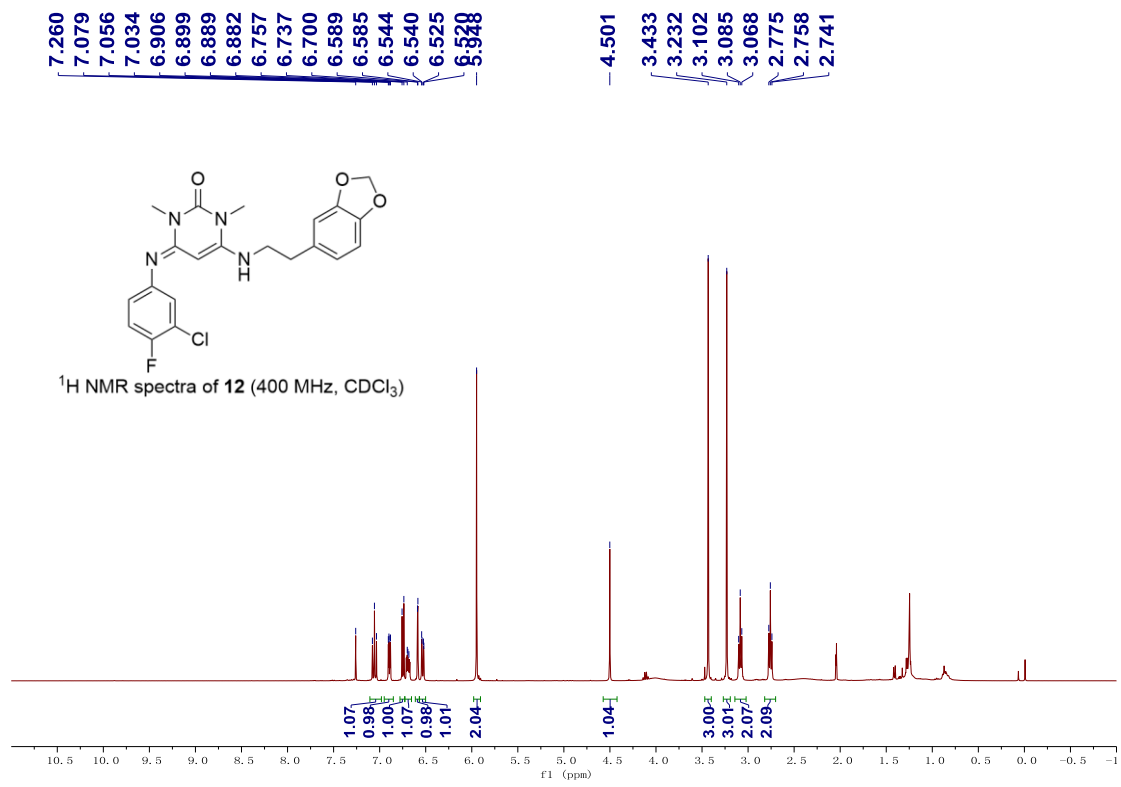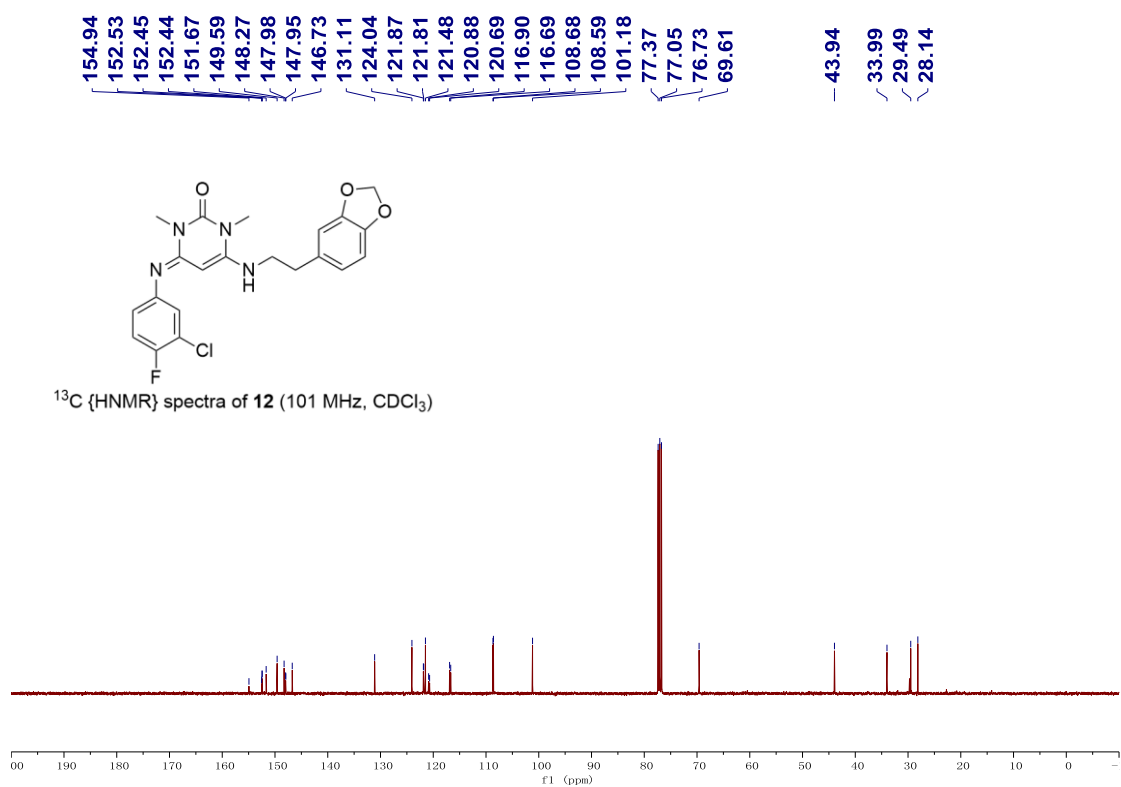

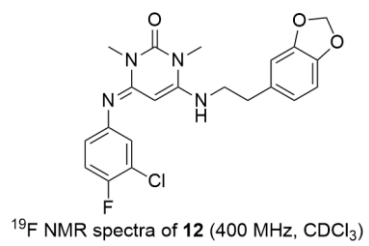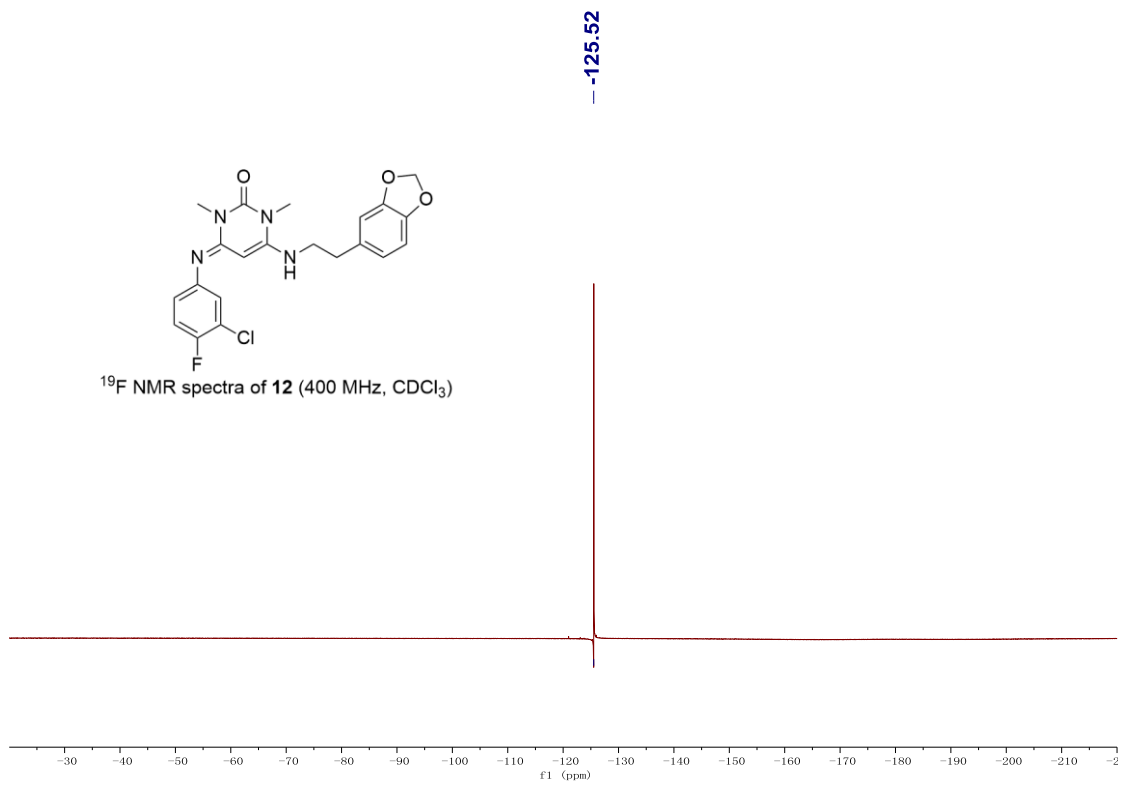

2.

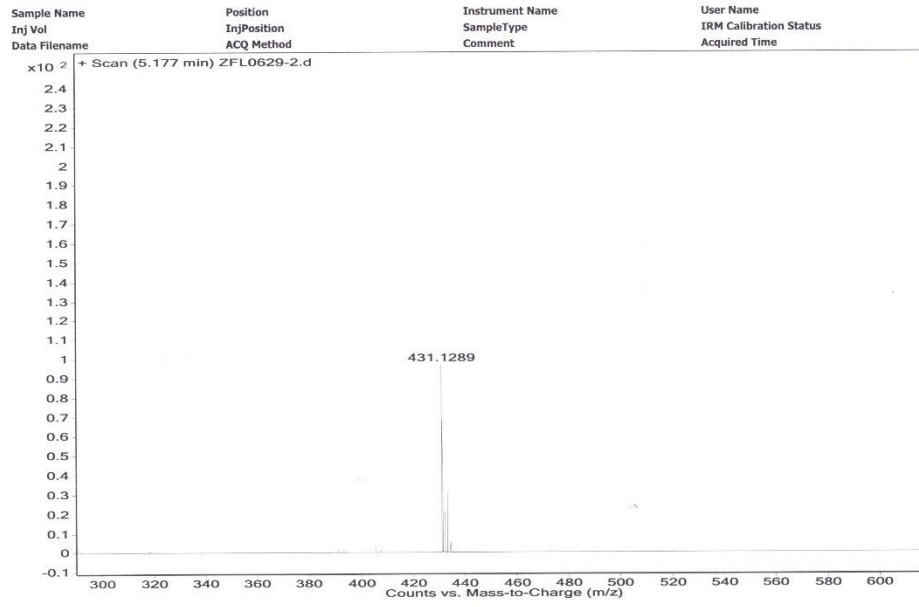

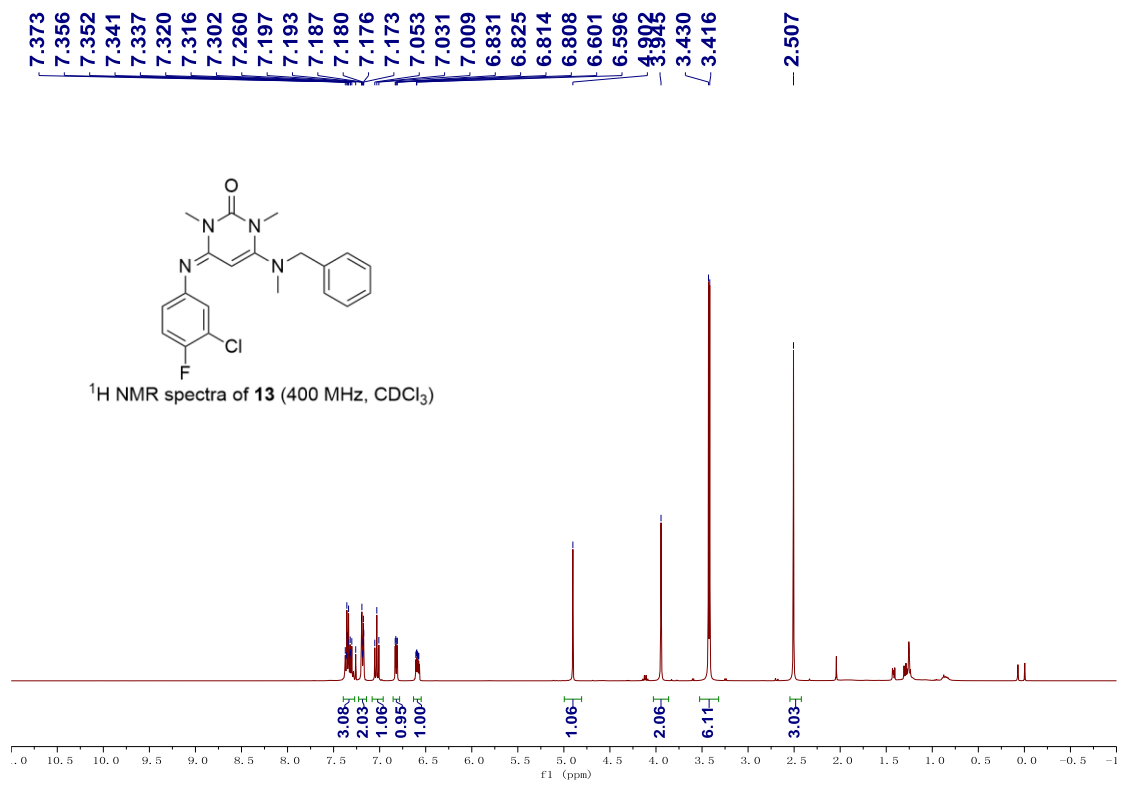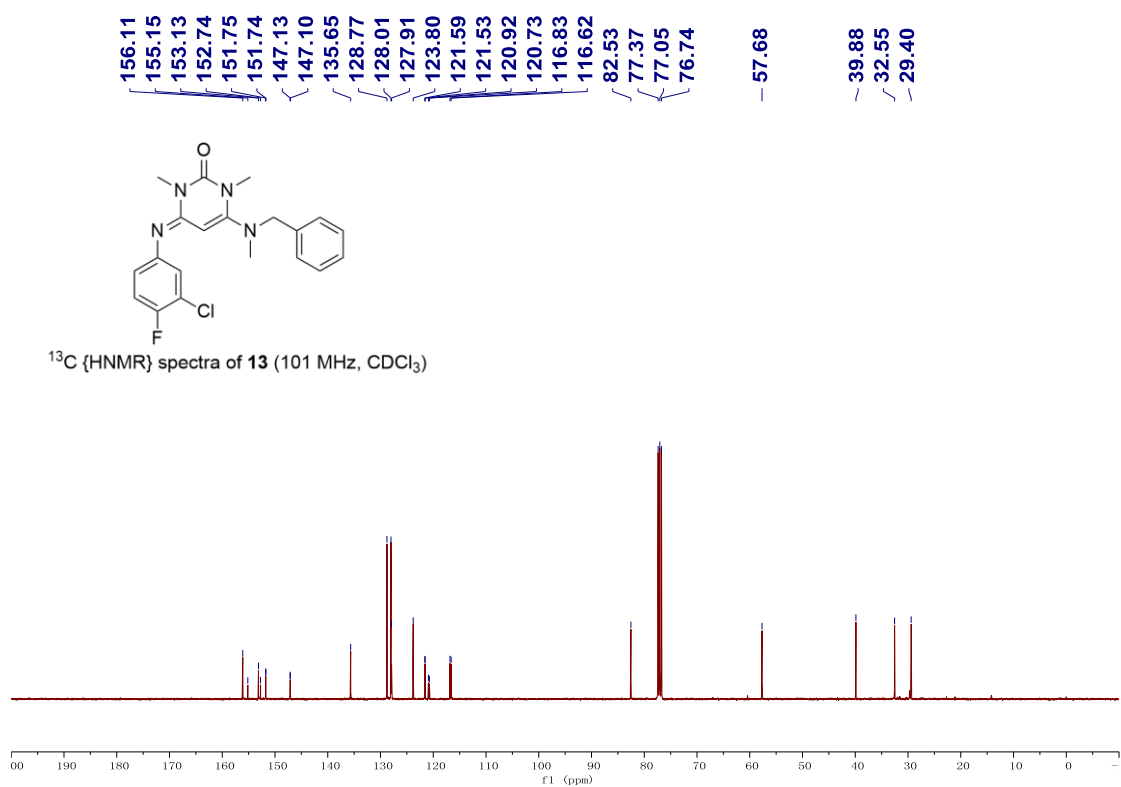



-124.89

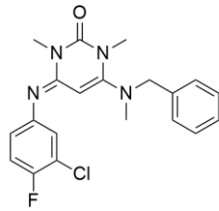

$^{19}\text{F}$  NMR spectra of **13** (400 MHz,  $\text{CDCl}_3$ )

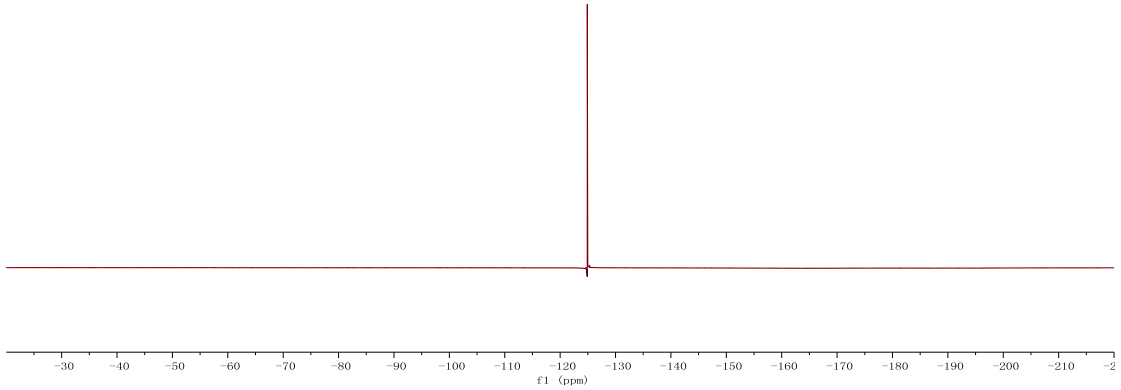

20220104-pos-4 #13 RT: 0.10 AV: 1 NL: 8.17E6  
T: FTMS + p ESI Full ms [200.0000-800.0000]

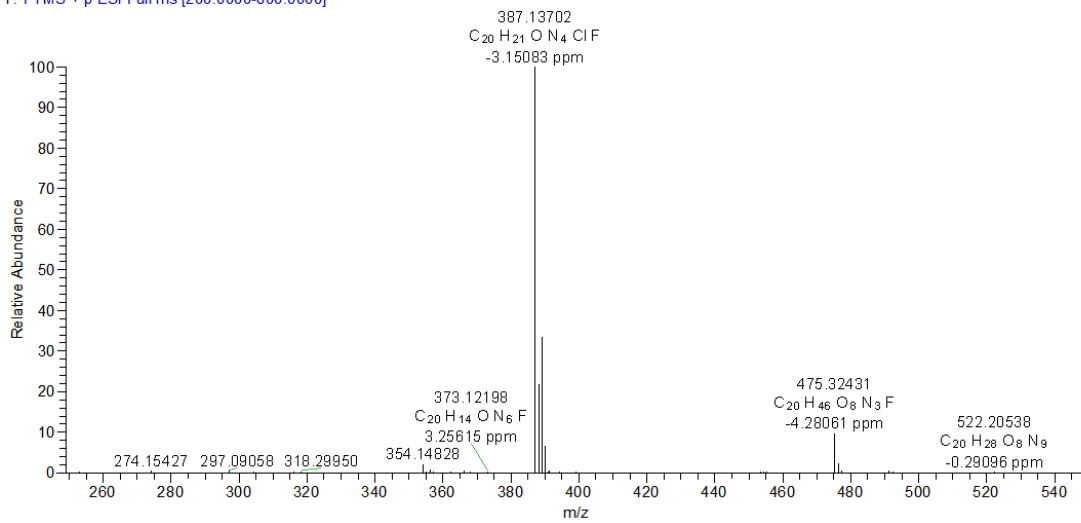

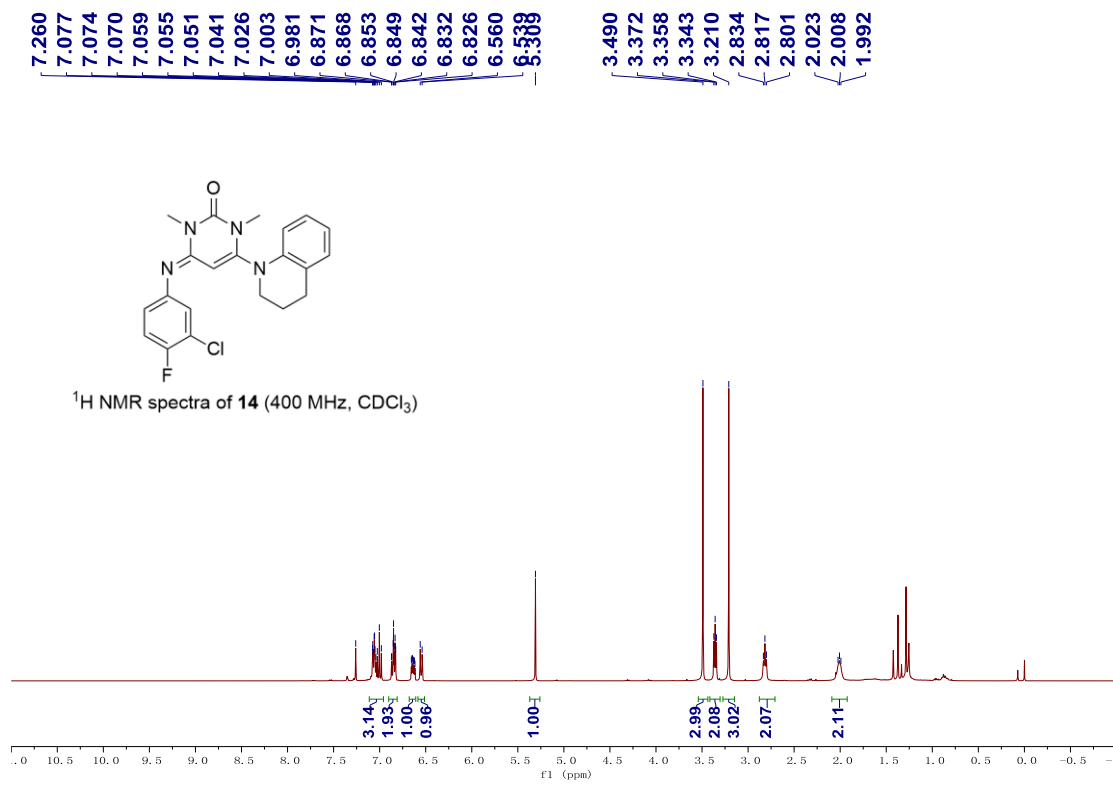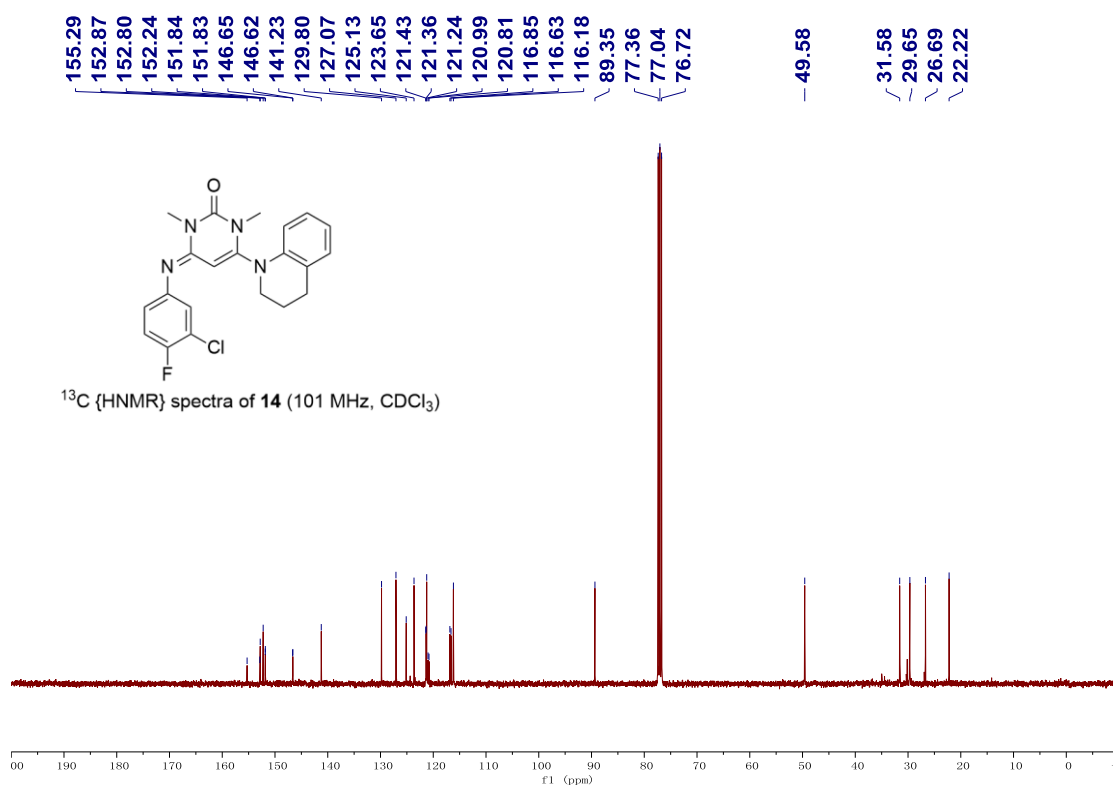

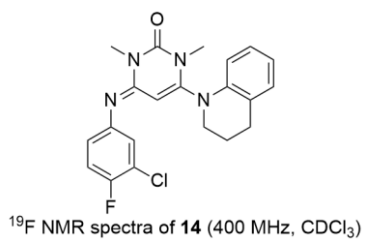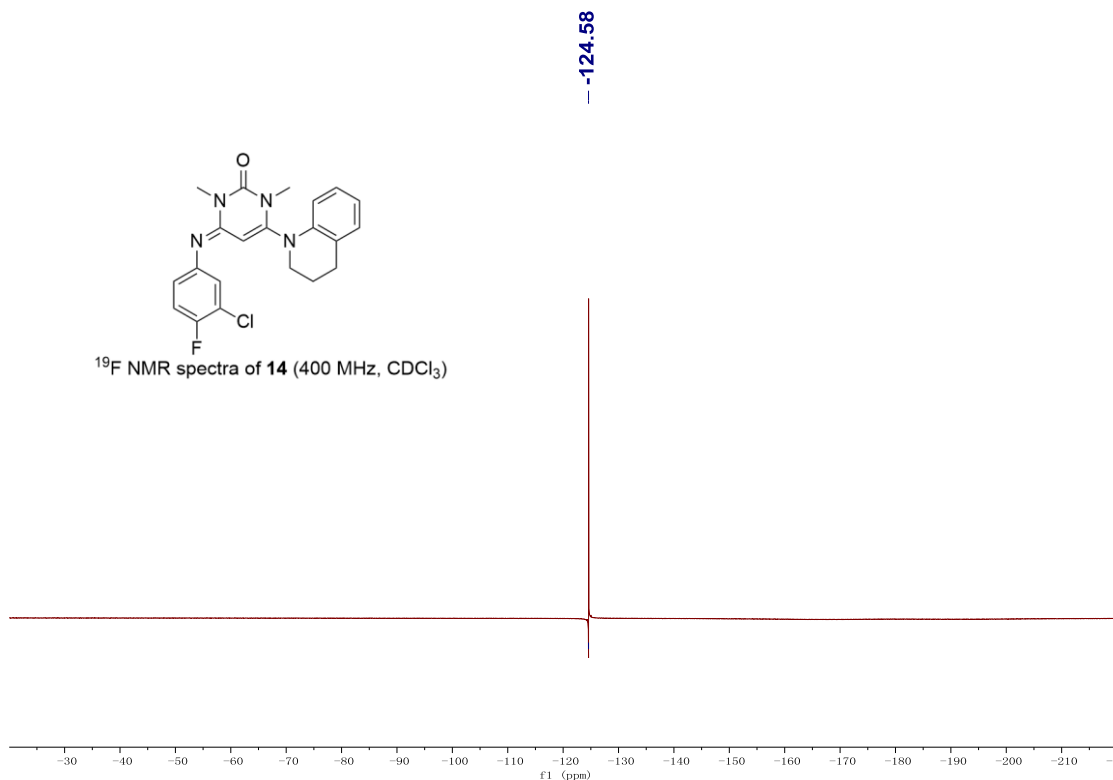

20220104-pos-1 #21 RT: 0.15 AV: 1 NL: 1.35E7  
 T: FTMS + p ESI Full ms [200.0000-800.0000]

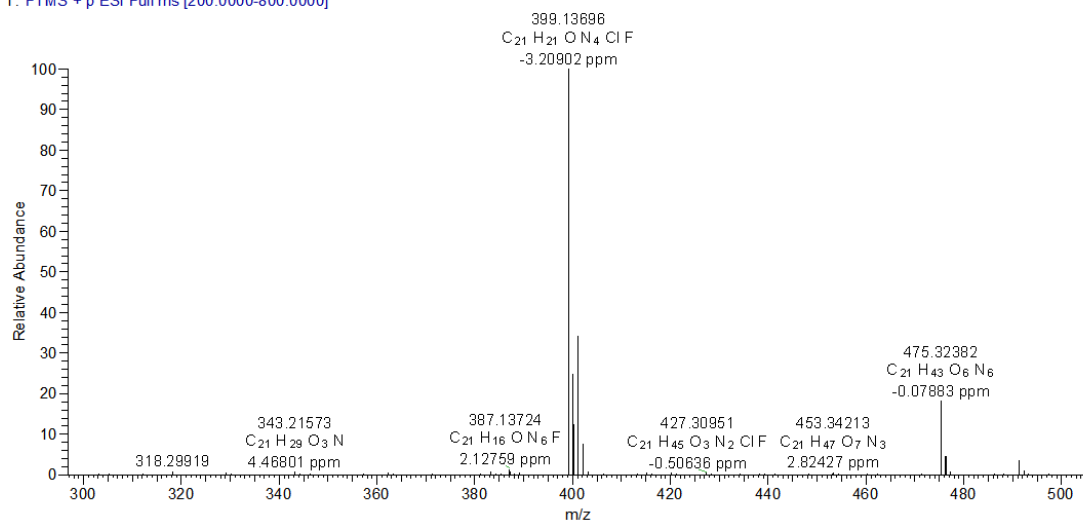

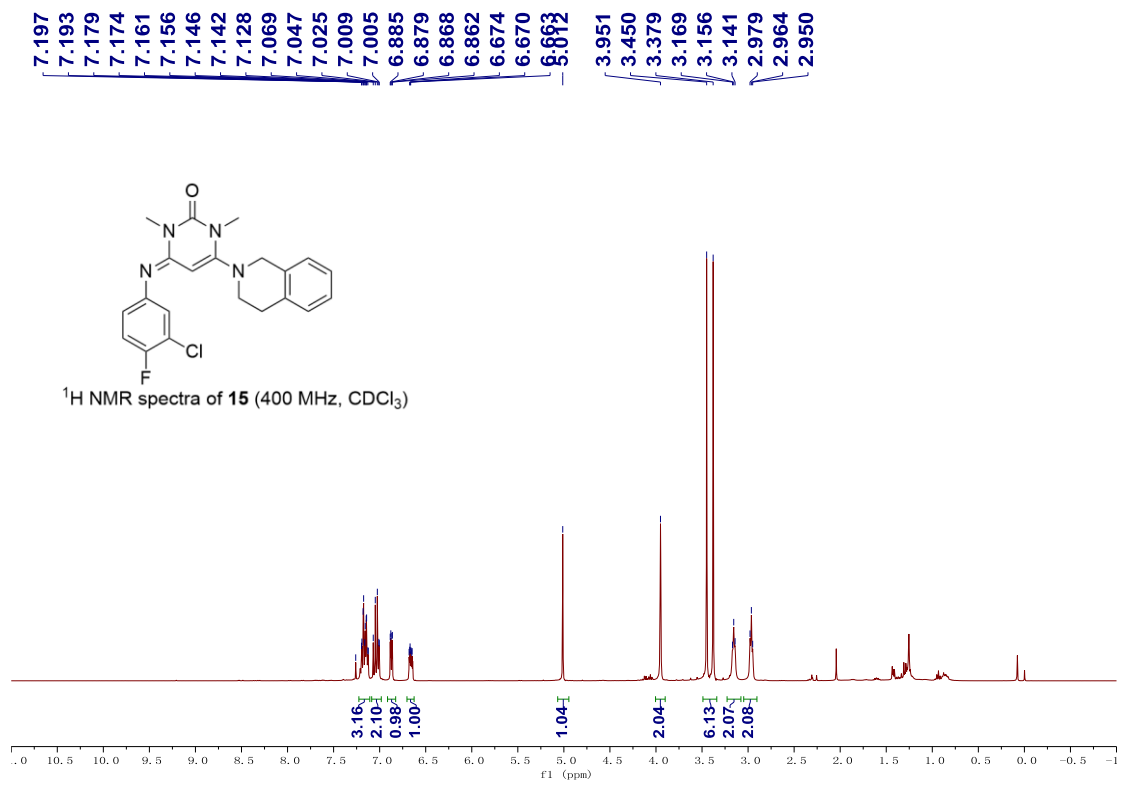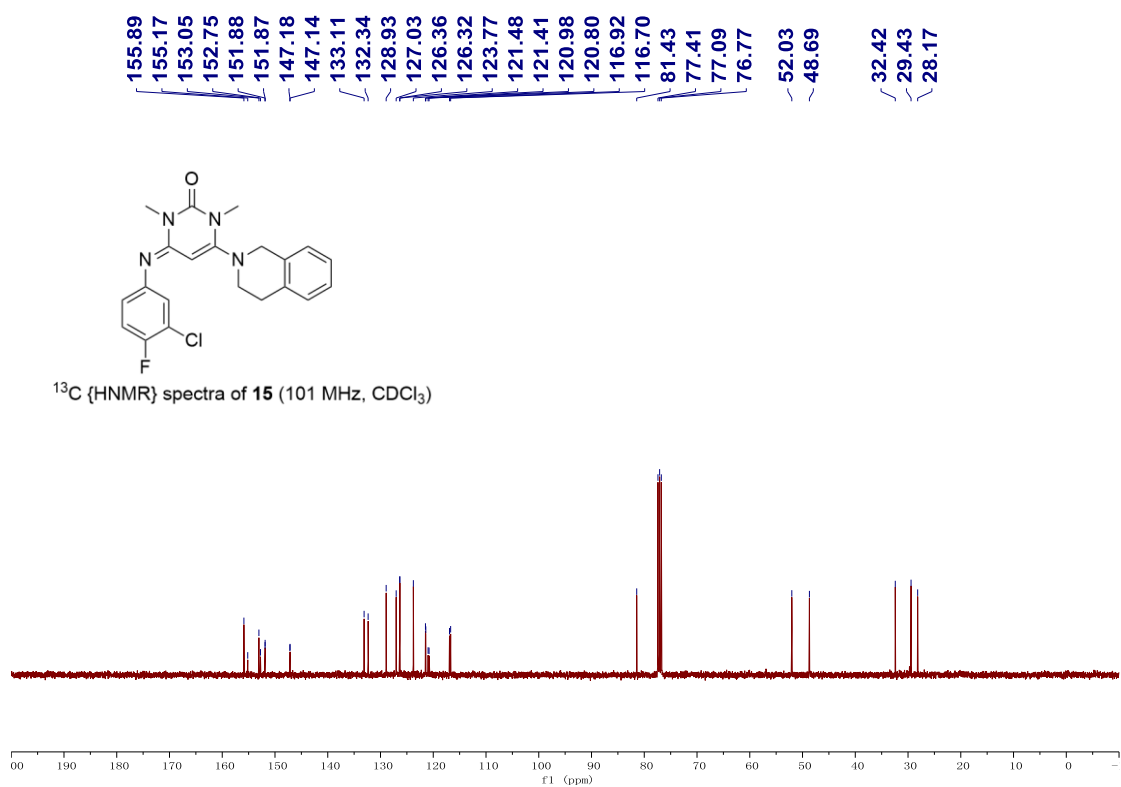

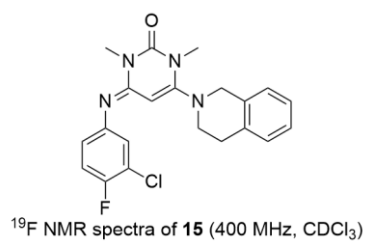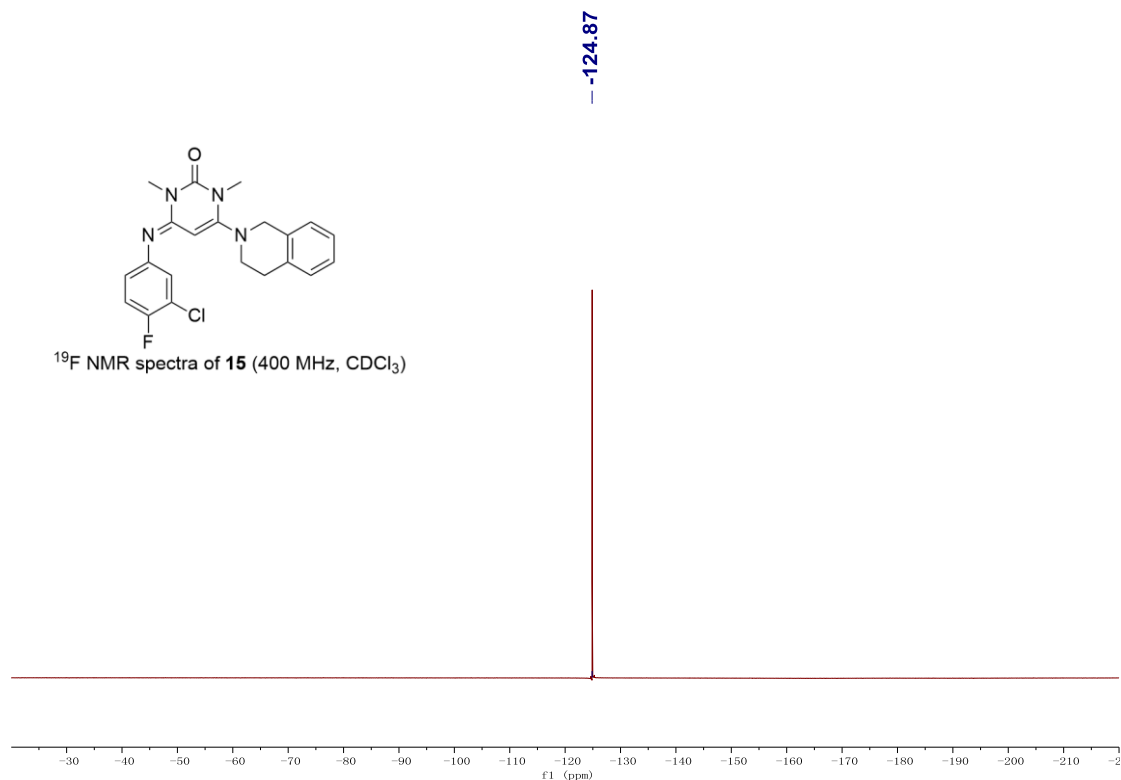

20220104-pos-5 #11 RT: 0.09 AV: 1 NL: 5.21E6  
 T: FTMS + p ESI Full ms [200.0000-800.0000]

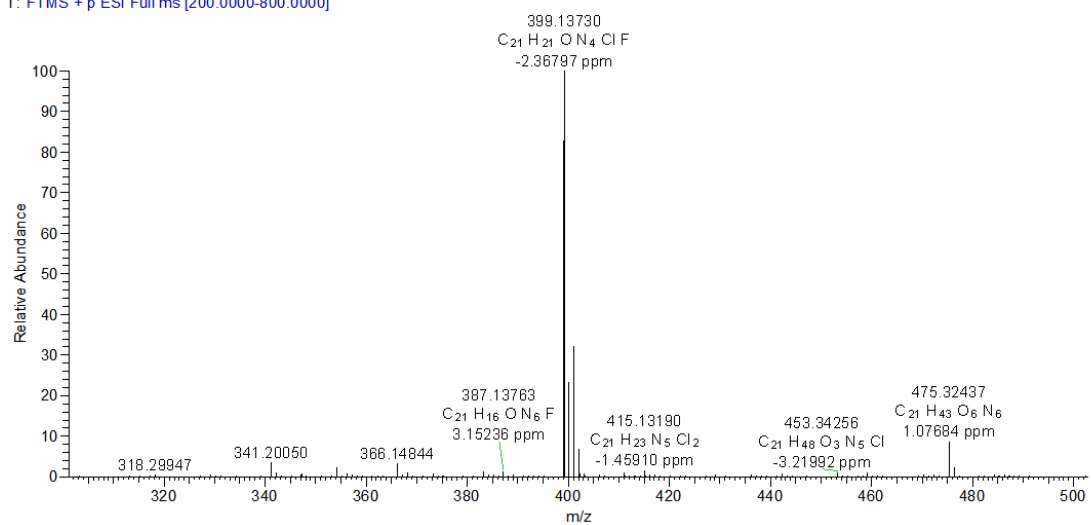

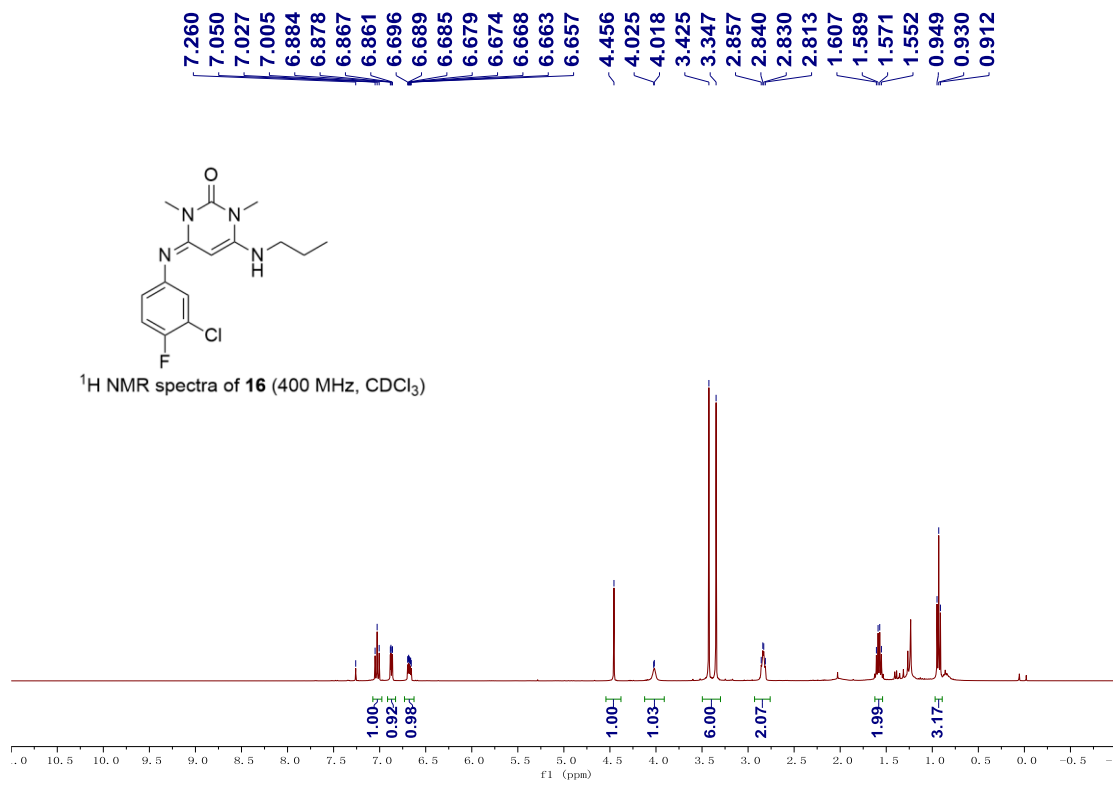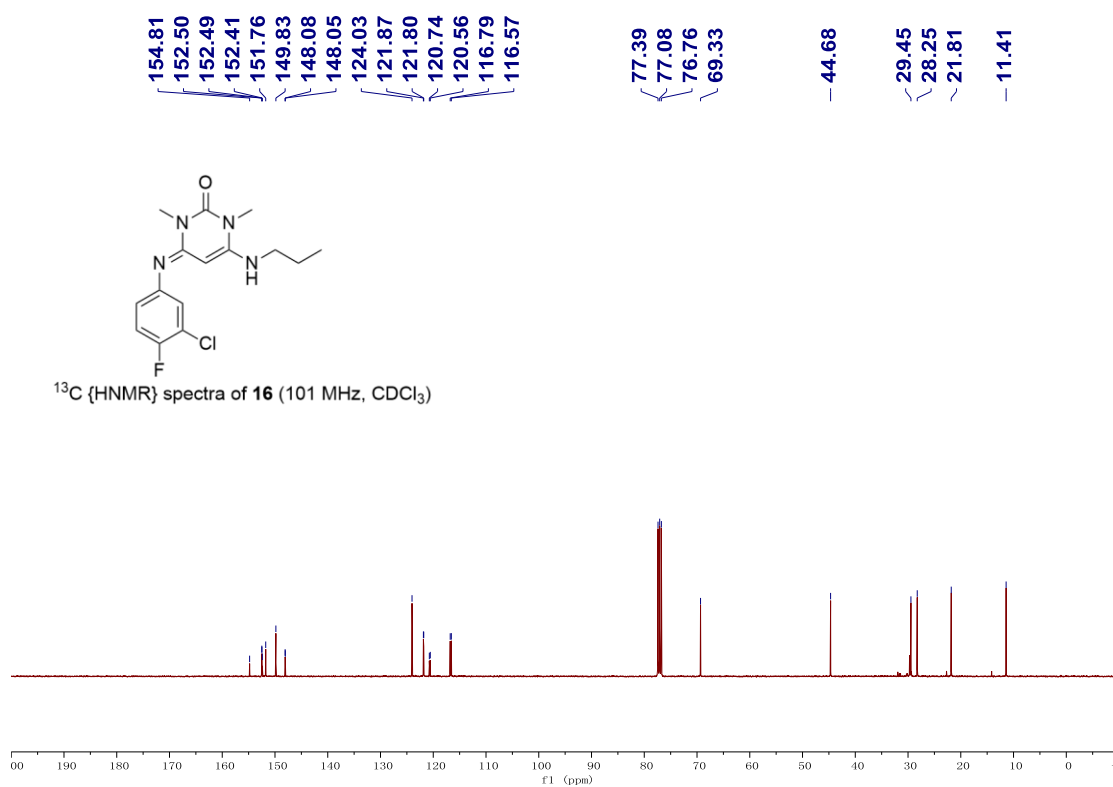

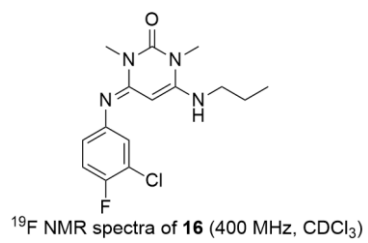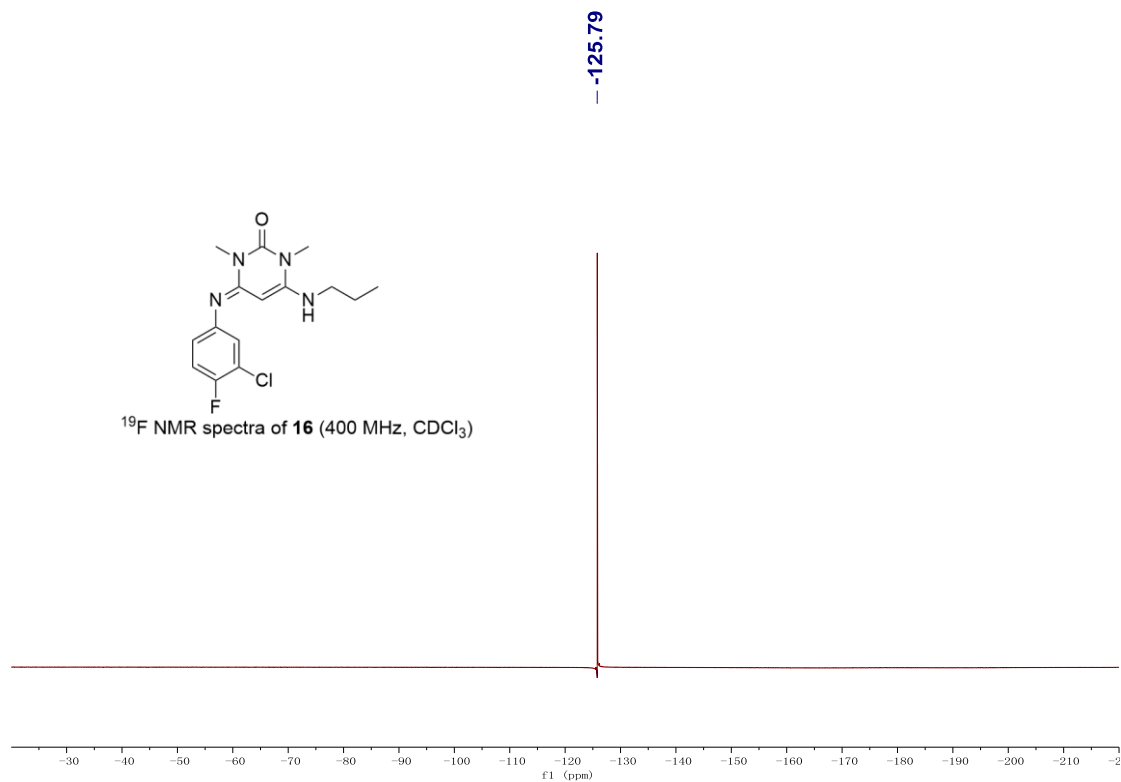

2.

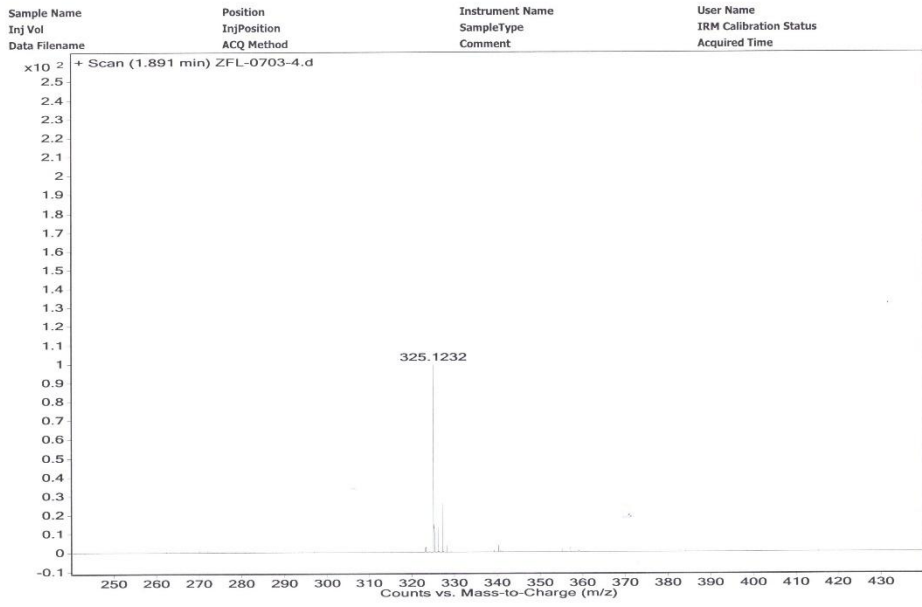



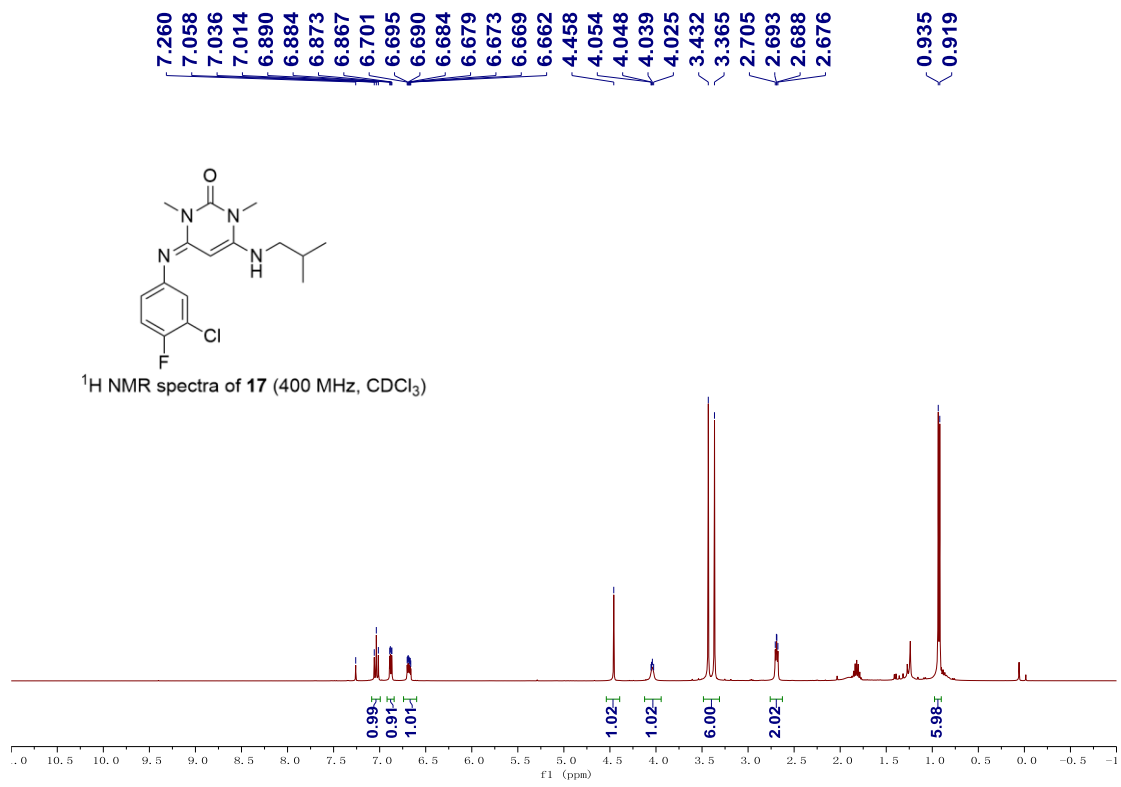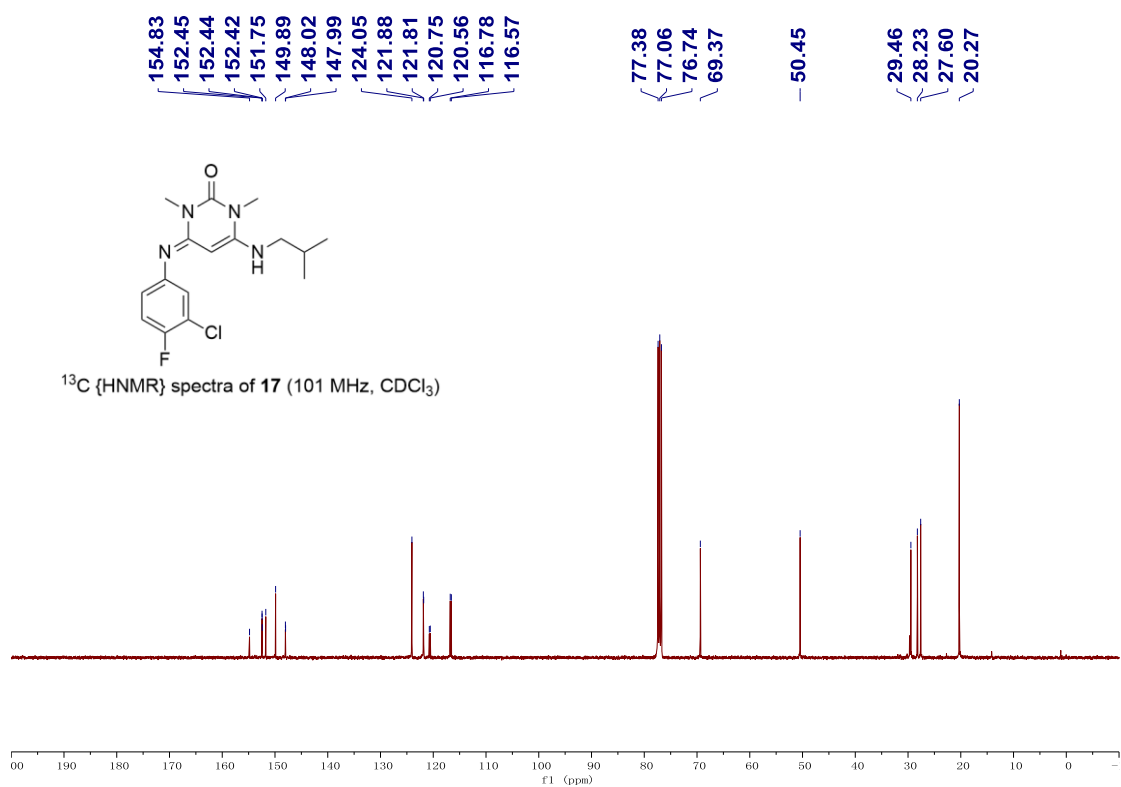

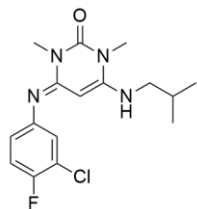

<sup>19</sup>F NMR spectra of 17 (400 MHz, CDCl<sub>3</sub>)

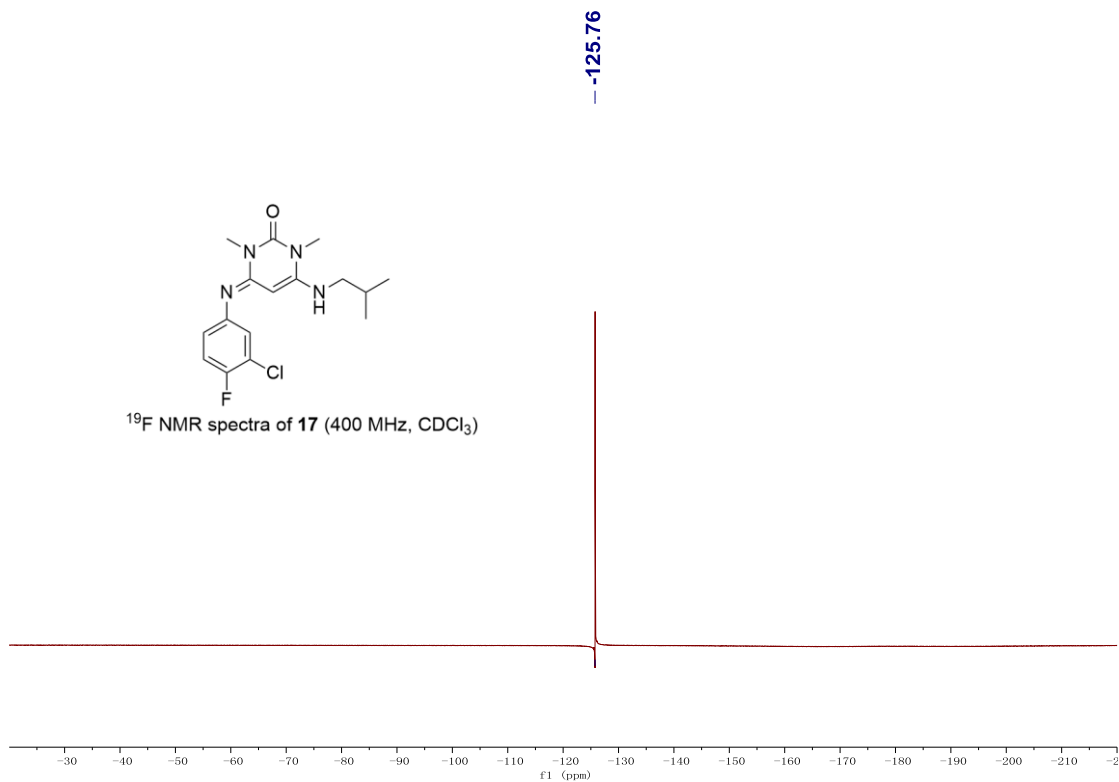

10.

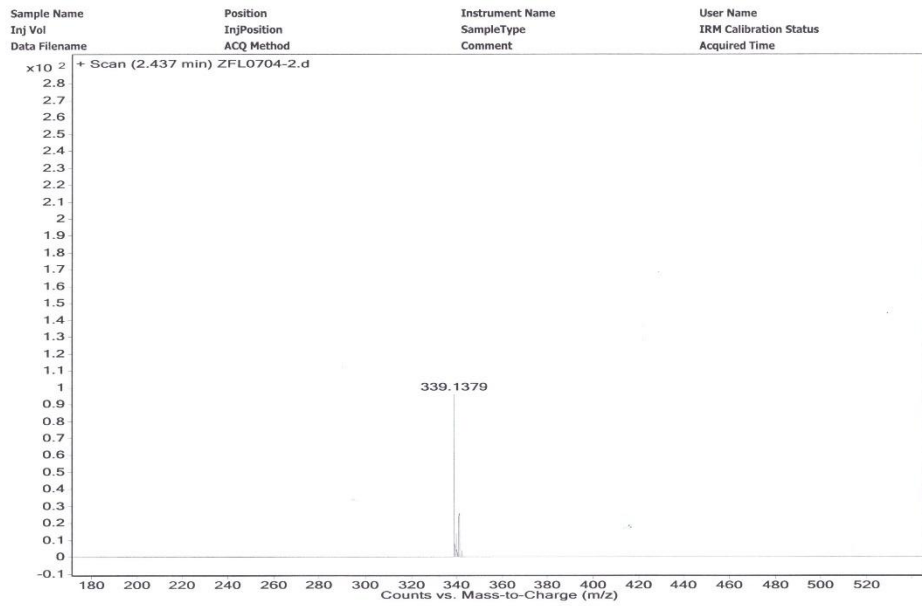

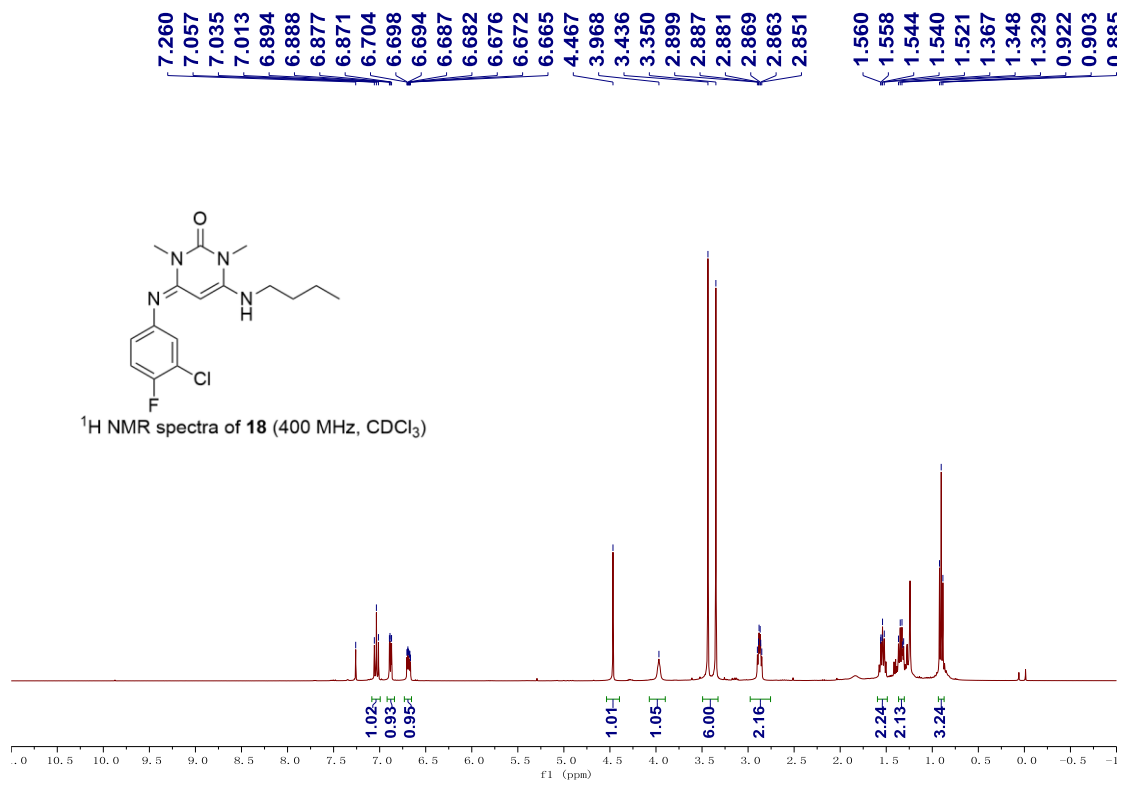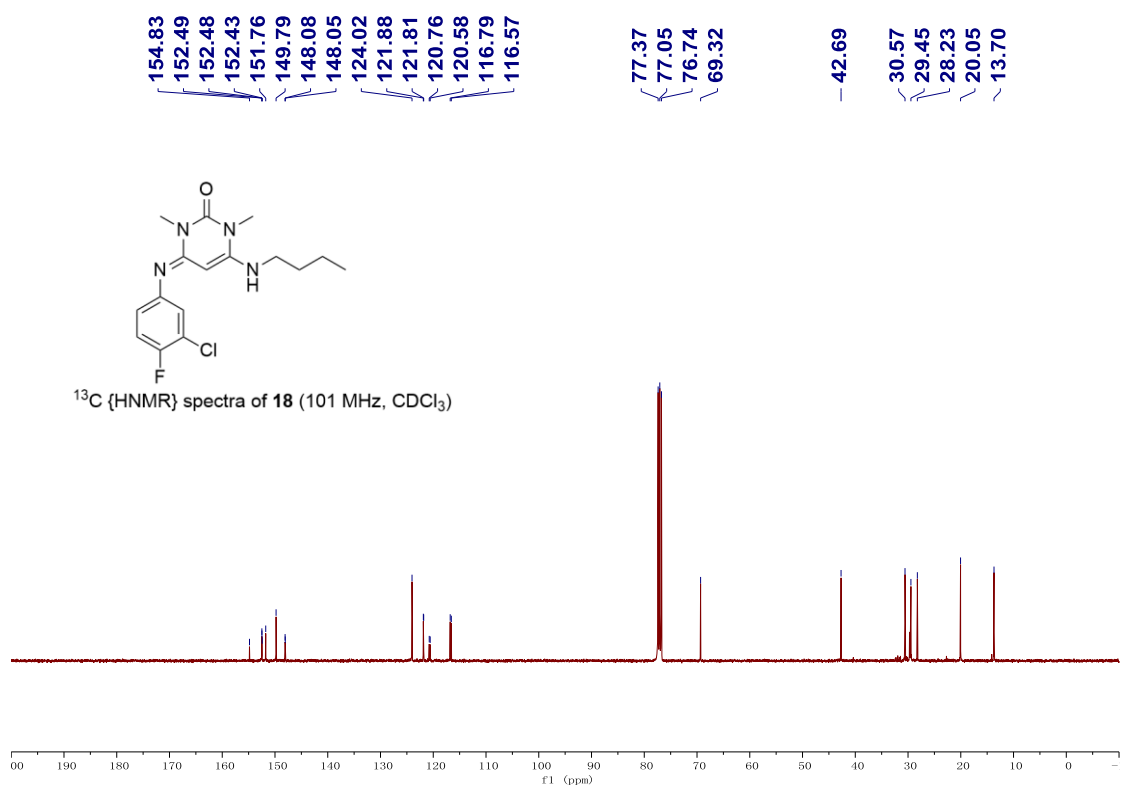

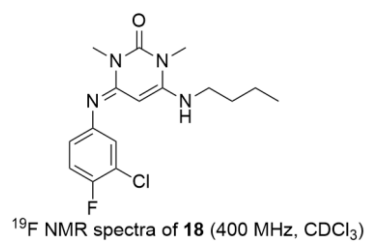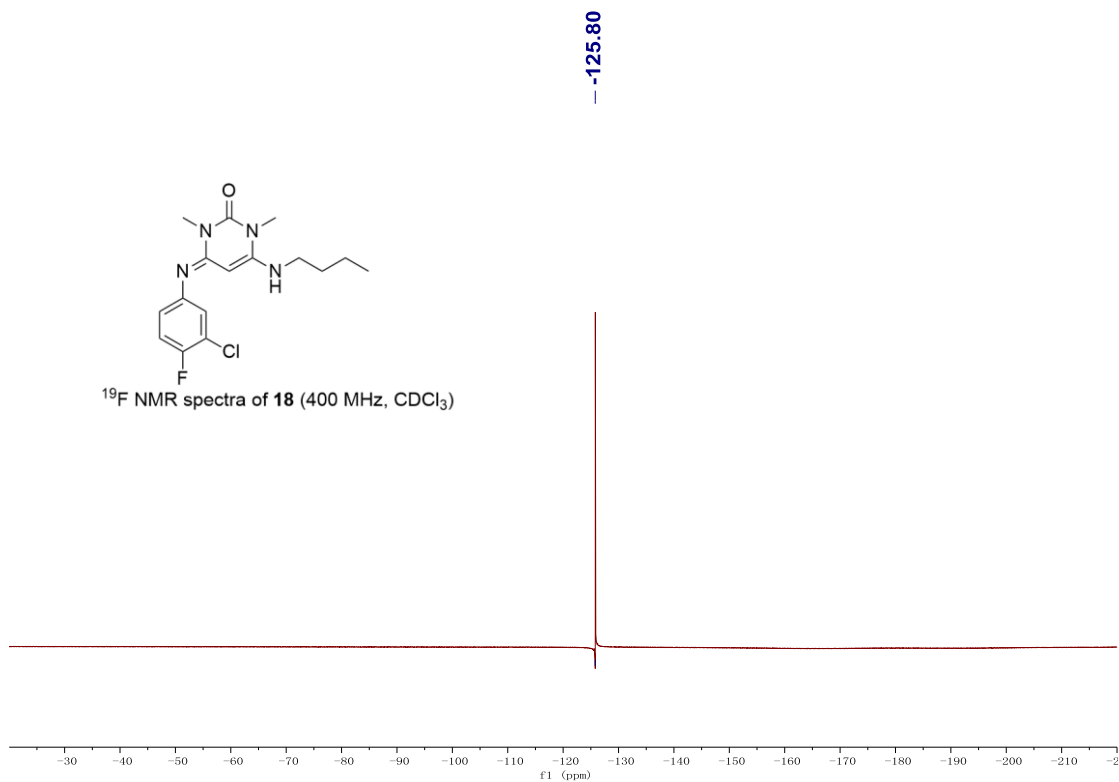

9.

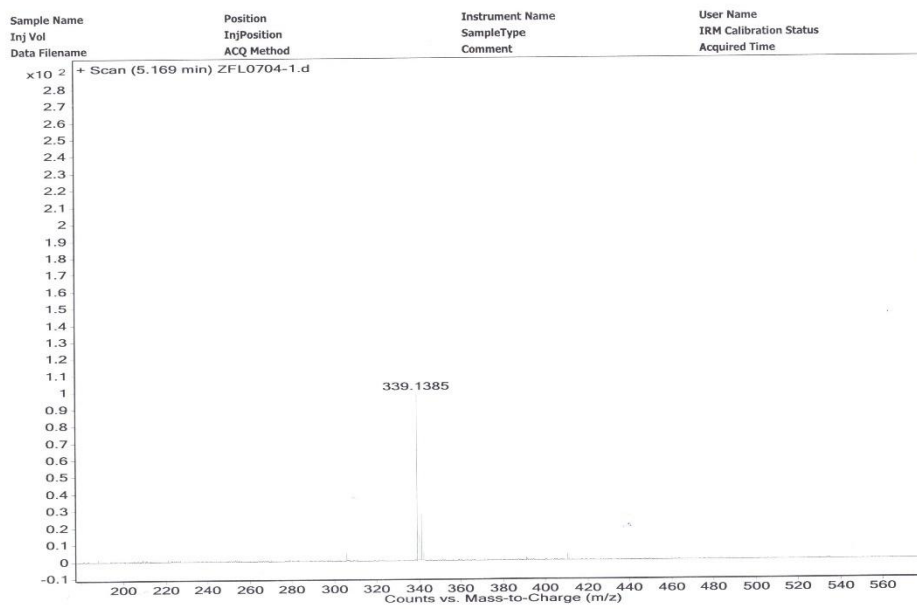

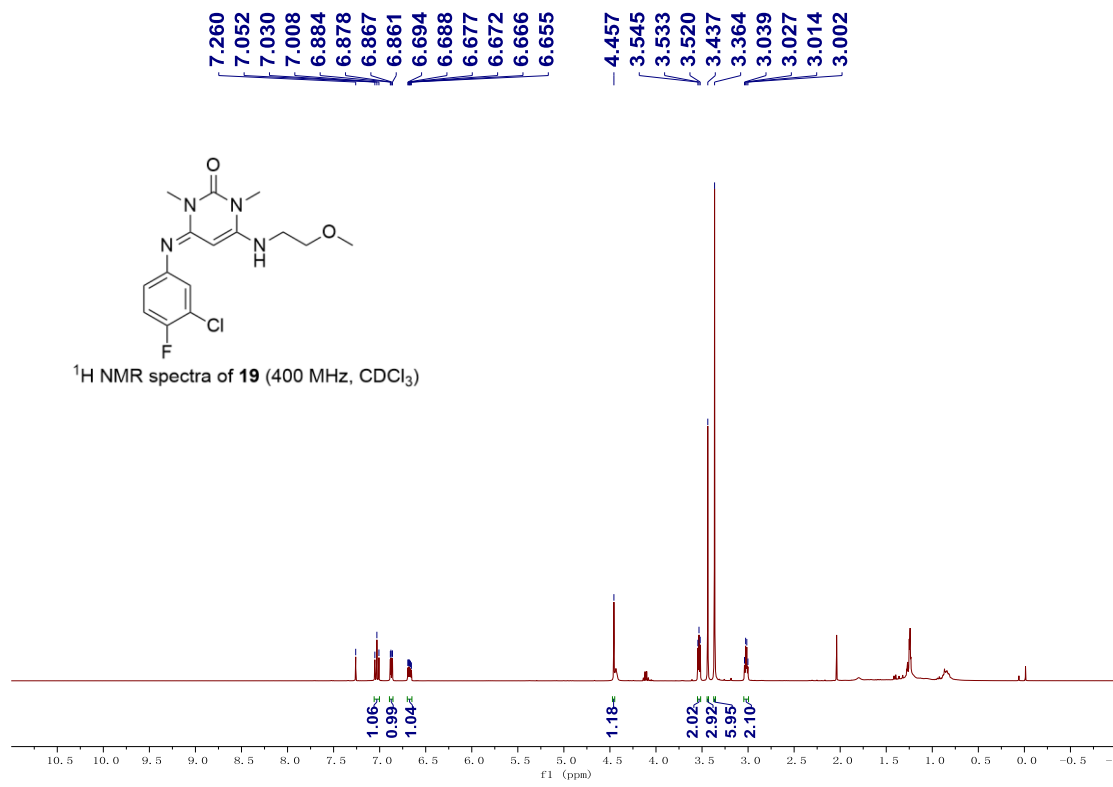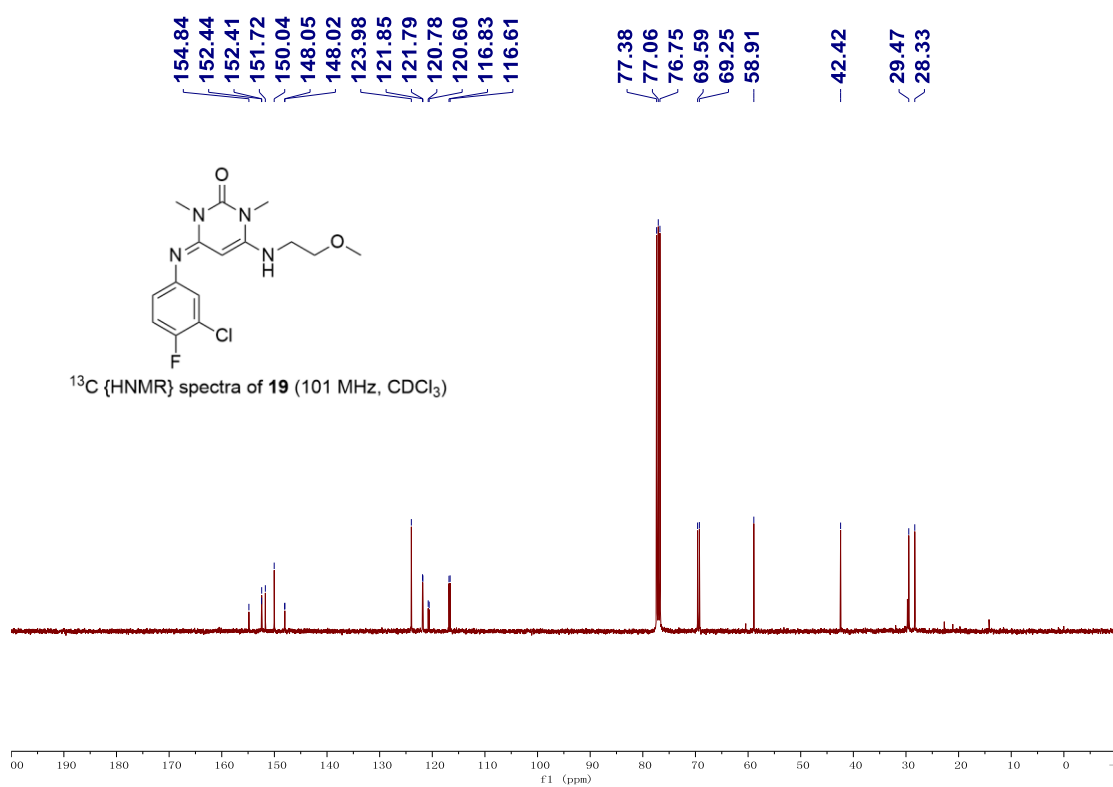

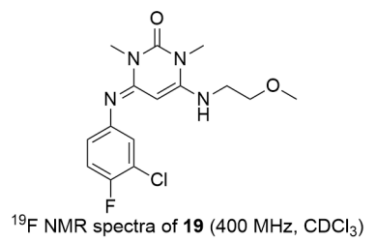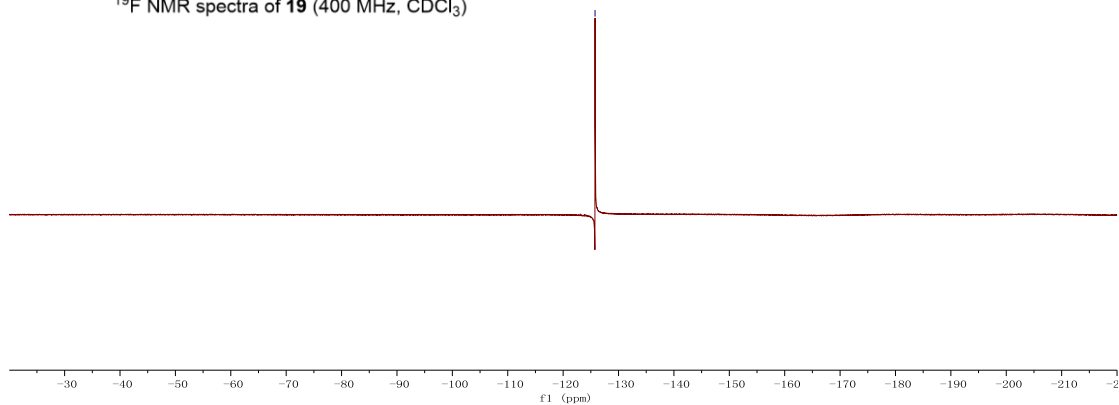



17.

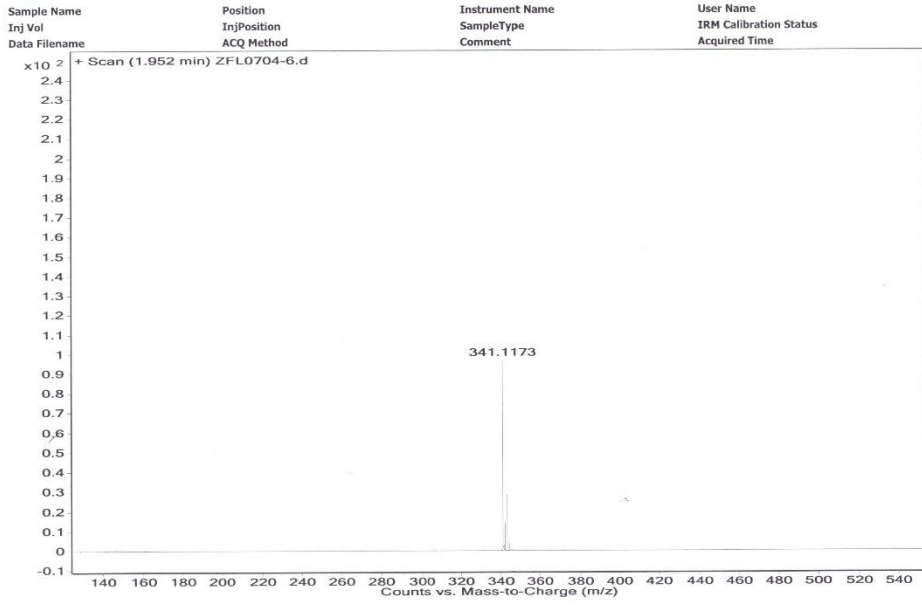

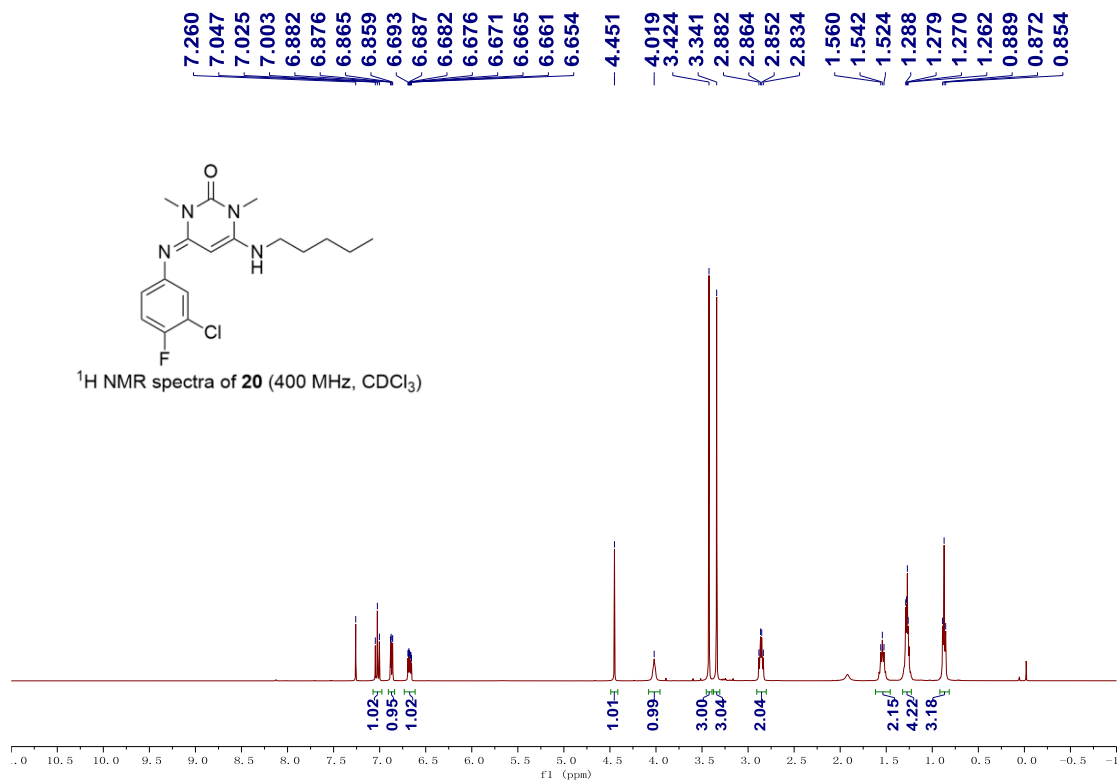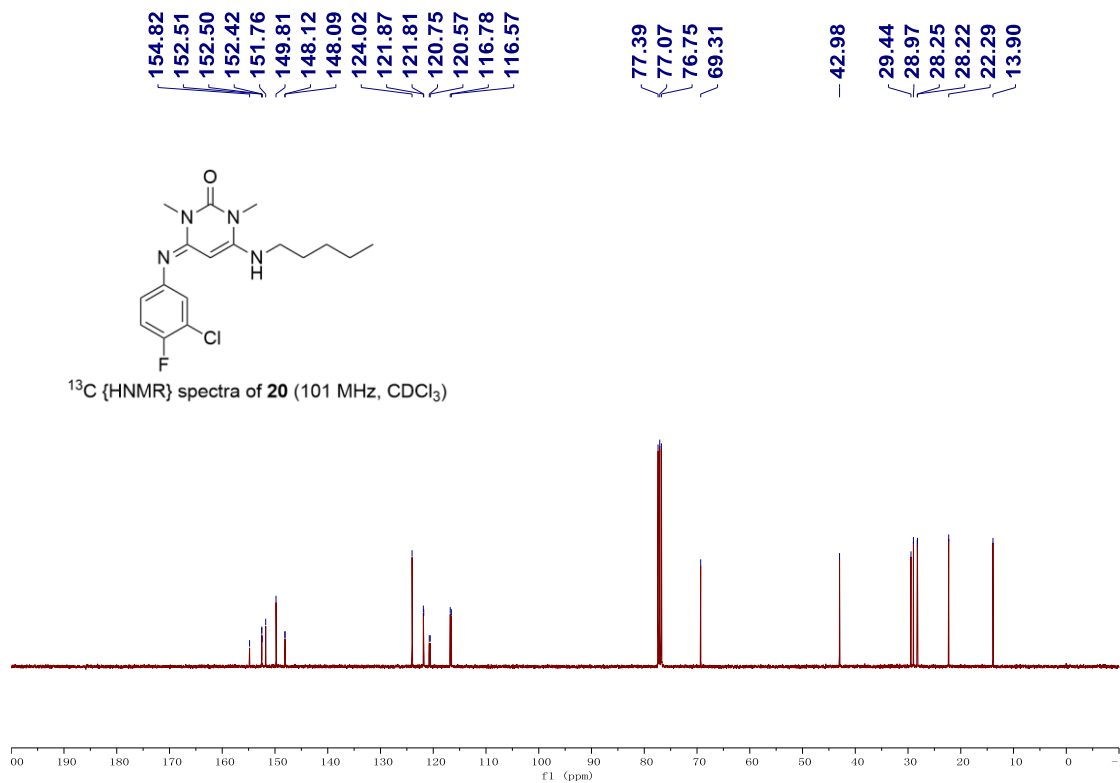

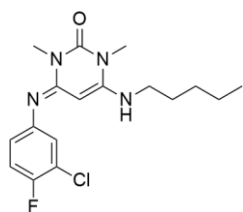

<sup>19</sup>F NMR spectra of **20** (400 MHz, CDCl<sub>3</sub>)

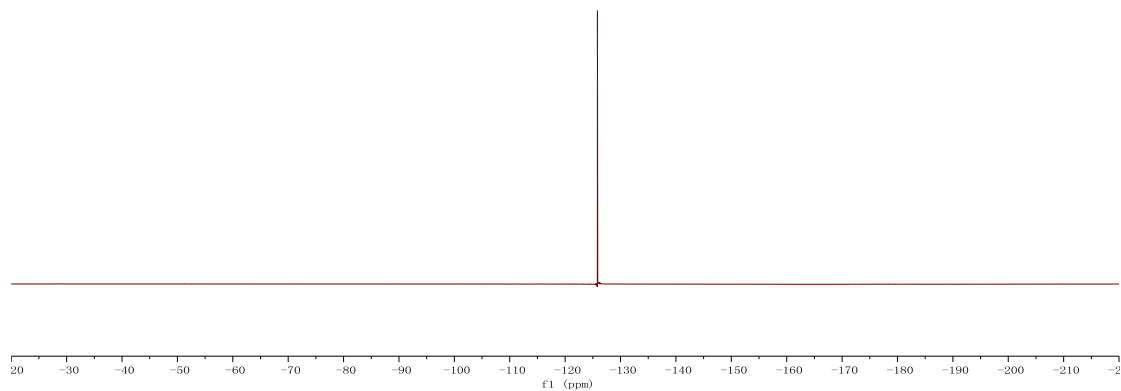

21.

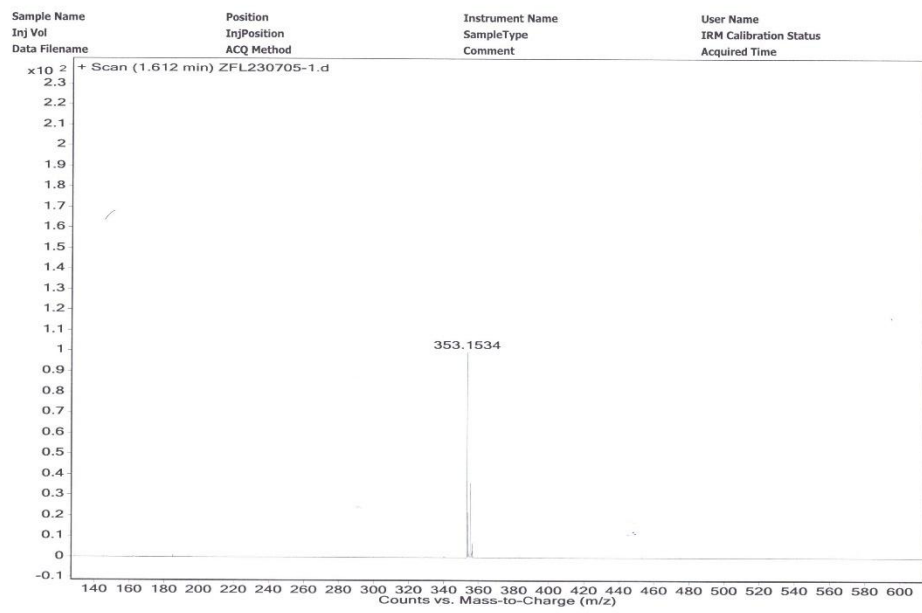

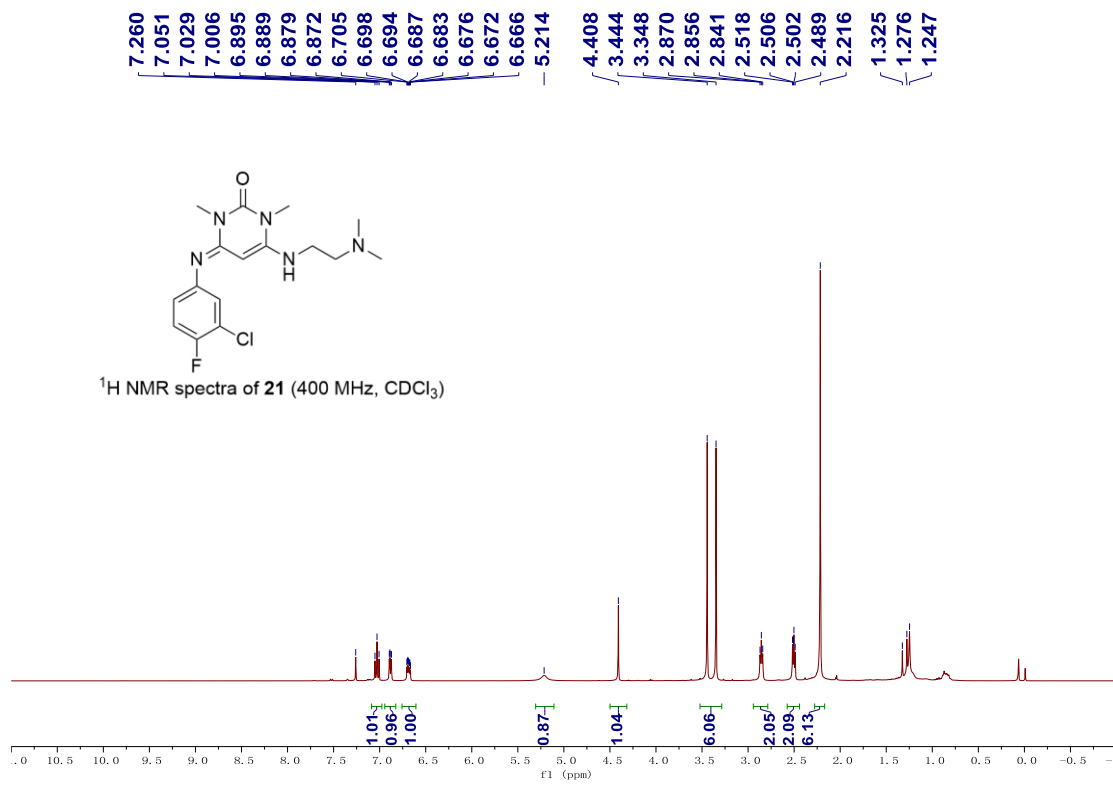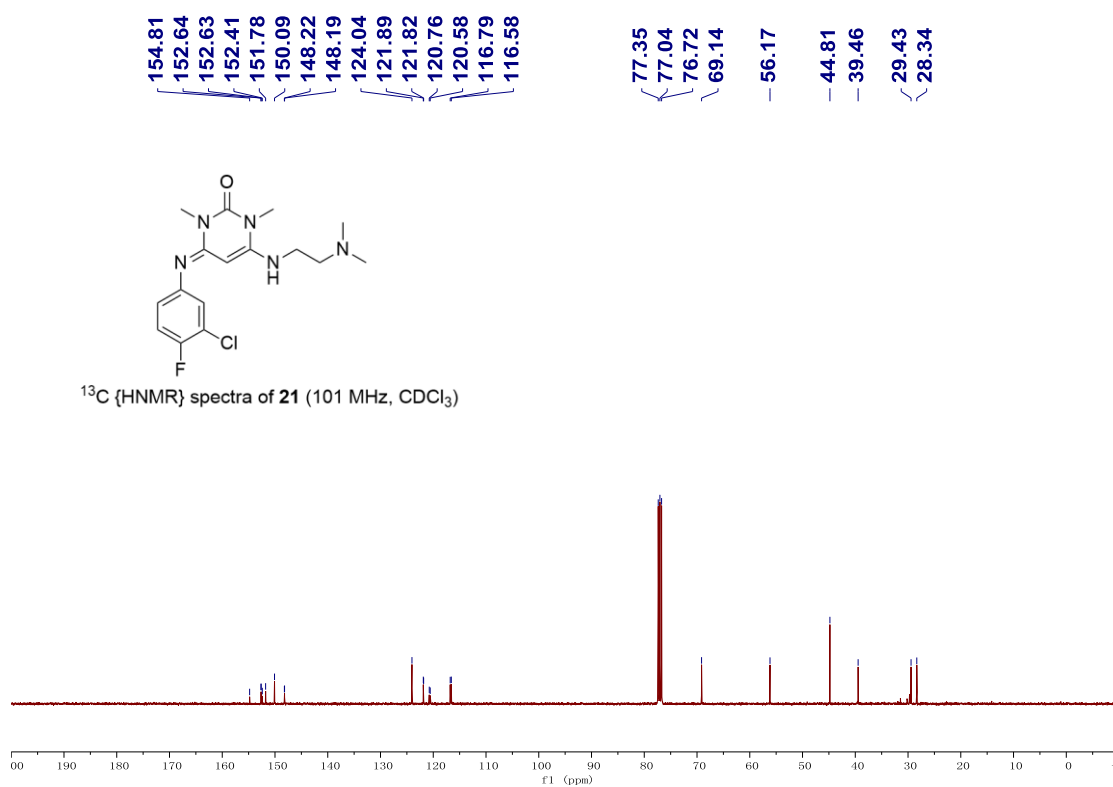

-125.91

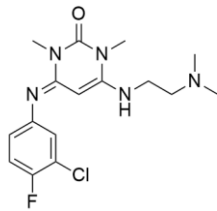

$^{19}\text{F}$  NMR spectra of **21** (400 MHz,  $\text{CDCl}_3$ )

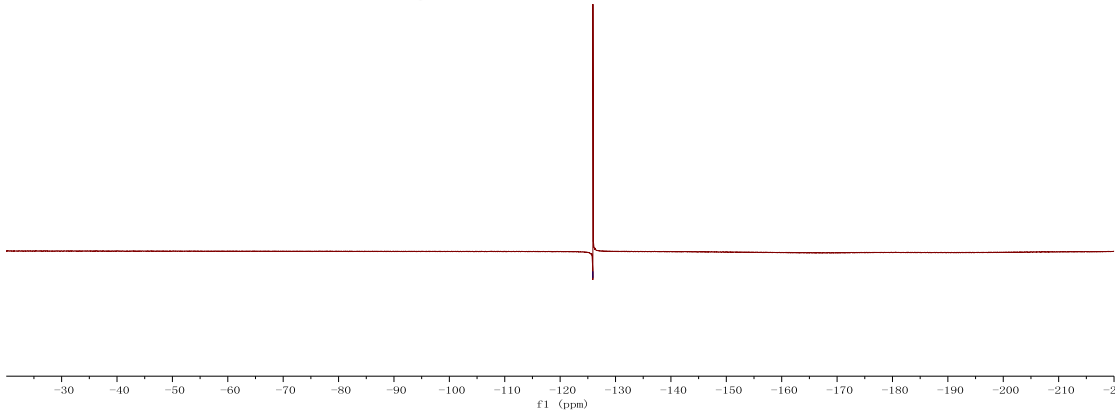

20220104-pos-3 #24 RT: 0.17 AV: 1 NL: 9.84E6  
T: FTMS + p ESI Full ms [200.0000-800.0000]

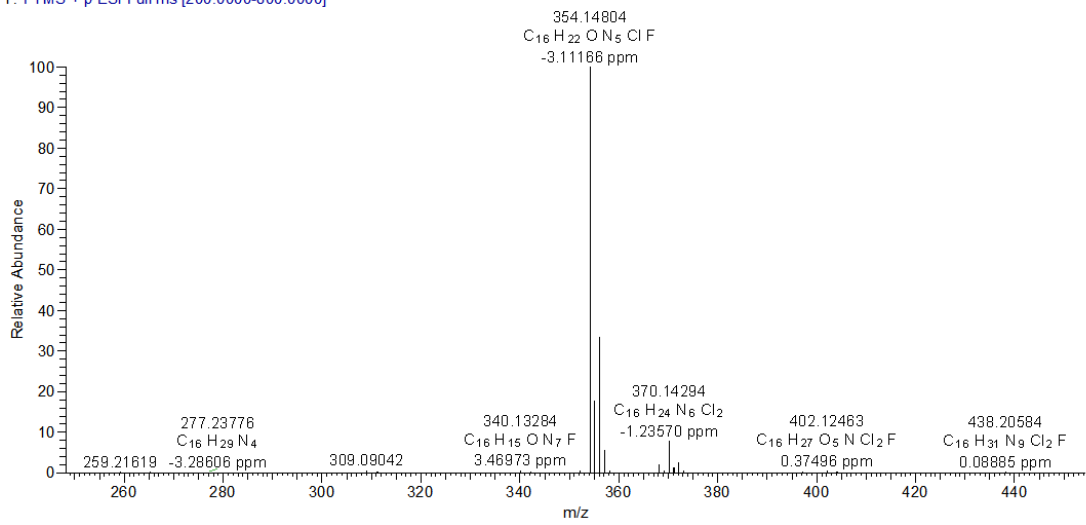

7.260  
7.037  
7.015  
6.992  
6.883  
6.877  
6.867  
6.860  
6.694  
6.688  
6.684  
6.677  
6.673  
6.666  
6.662  
6.656  
5.475  
4.388  
3.431  
3.324  
2.839  
2.825  
2.811  
2.640  
2.626  
2.611  
2.521  
2.503  
2.485  
2.467  
1.009  
0.992  
0.974

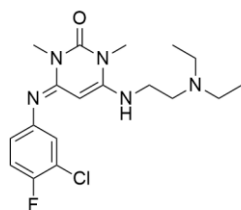

<sup>1</sup>H NMR spectra of 22 (400 MHz, CDCl<sub>3</sub>)

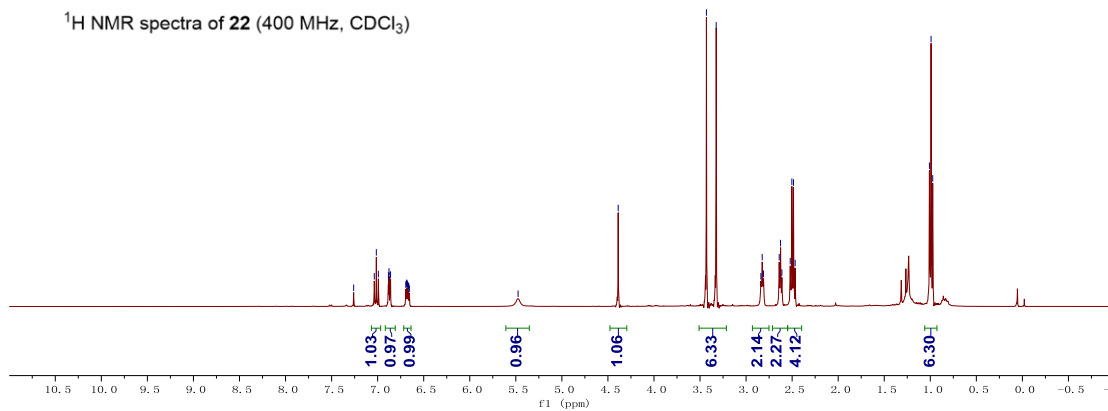

154.76  
152.72  
152.71  
152.36  
151.79  
150.05  
148.31  
148.28  
124.04  
121.90  
121.83  
120.72  
120.54  
116.77  
116.56  
77.39  
77.07  
76.75  
69.06  
49.83  
46.31  
39.31  
29.40  
28.27  
12.10

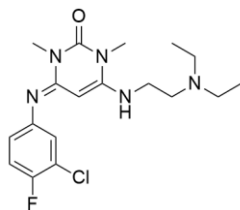

<sup>13</sup>C {HNMR} spectra of 22 (101 MHz, CDCl<sub>3</sub>)

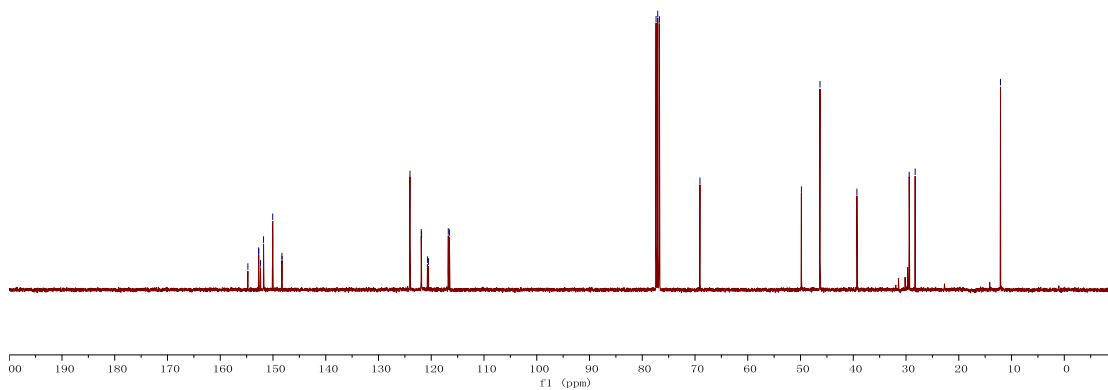

-125.99

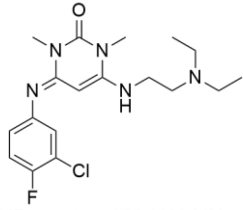

<sup>19</sup>F NMR spectra of **22** (400 MHz, CDCl<sub>3</sub>)

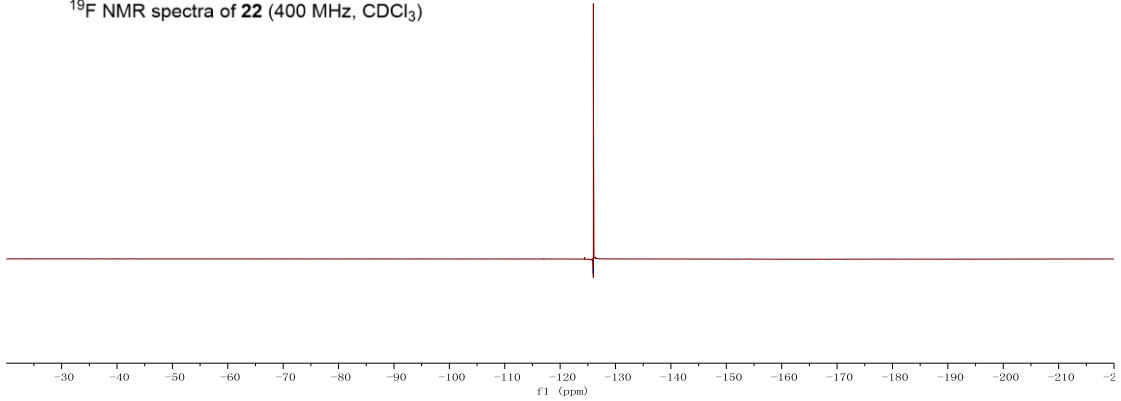

20220104-pos-6 #33 RT: 0.23 AV: 1 NL: 1.51E7  
T: FTMS + p ESI Full ms [200.0000-800.0000]

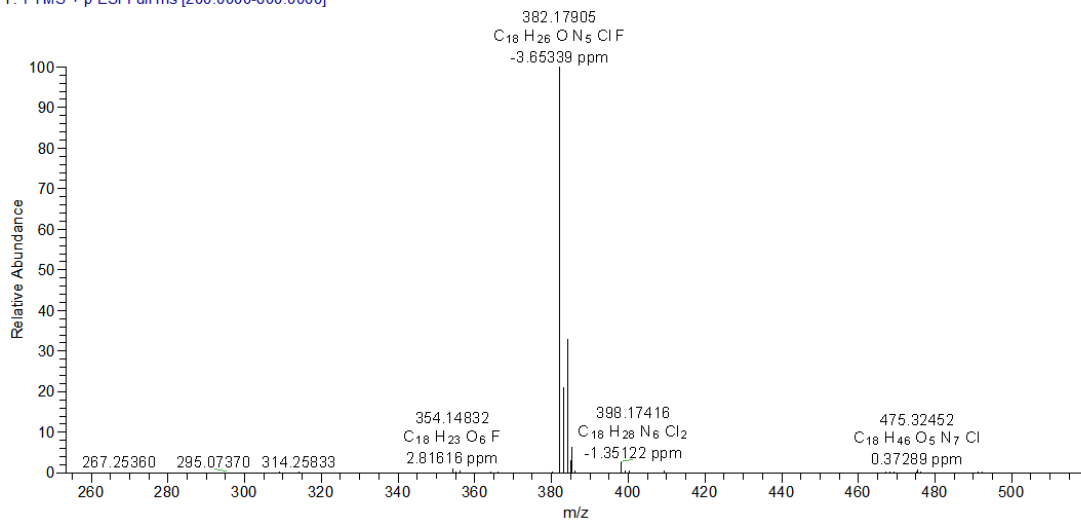



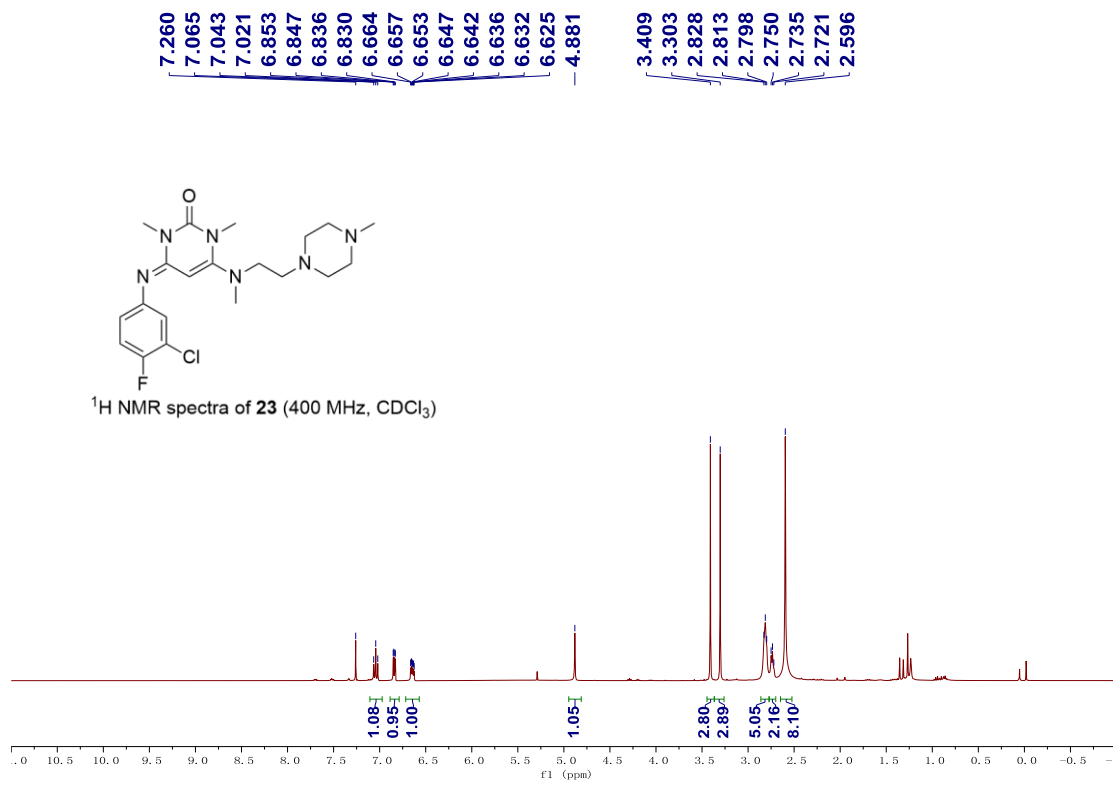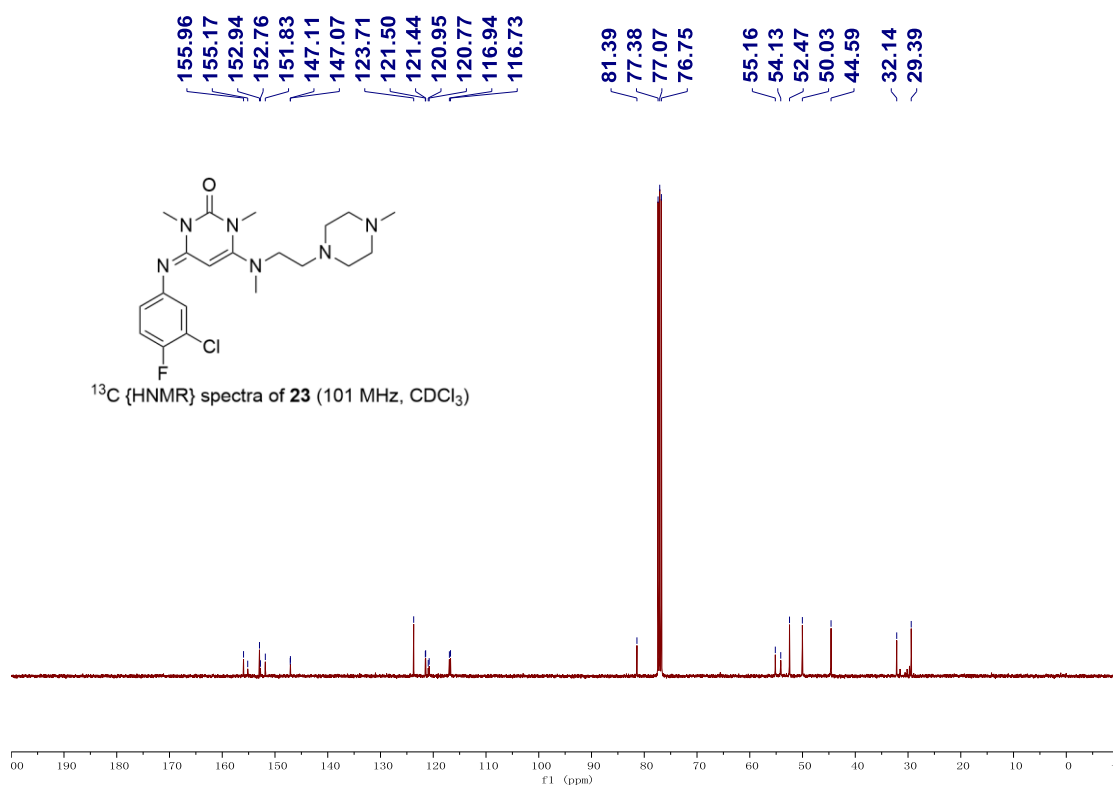

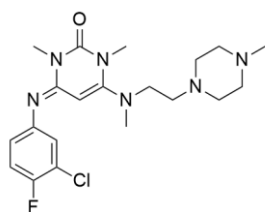

$^{19}\text{F}$  NMR spectra of **23** (400 MHz,  $\text{CDCl}_3$ )

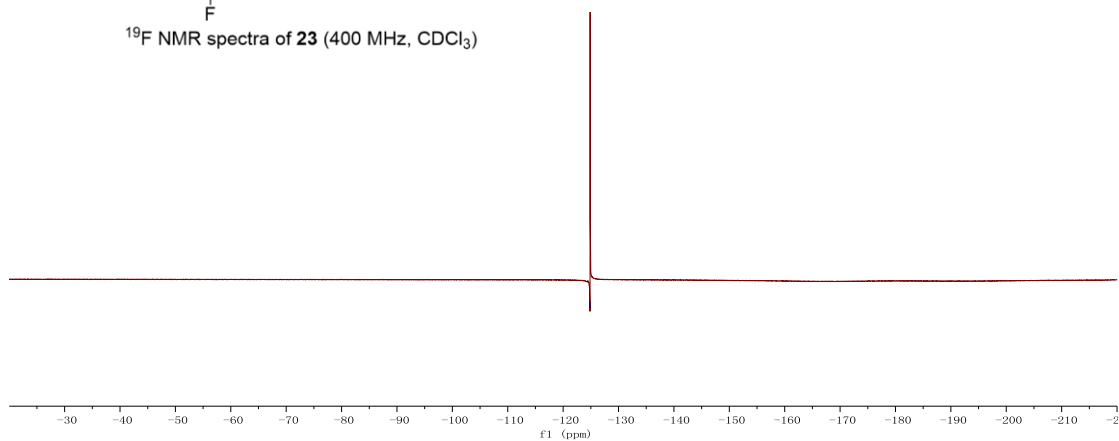

12.

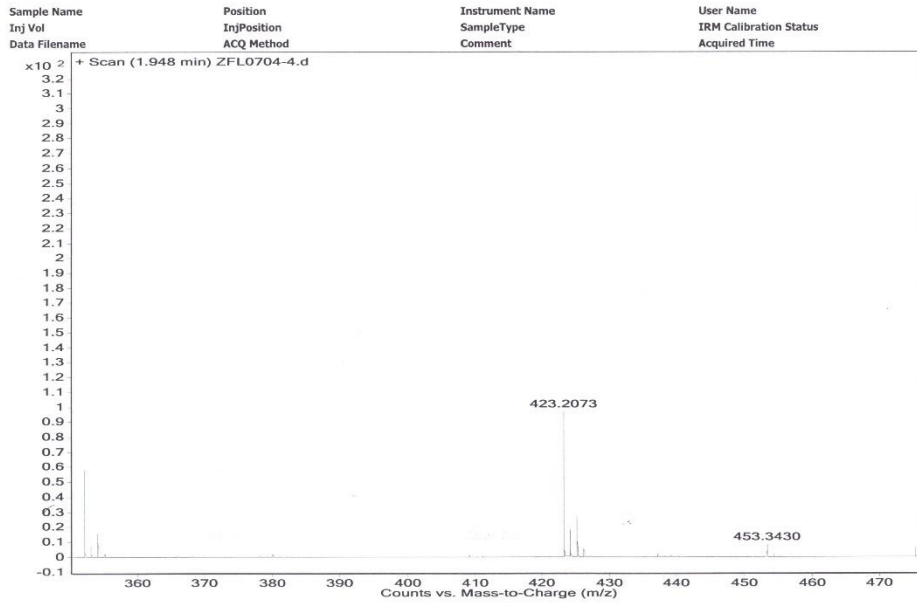

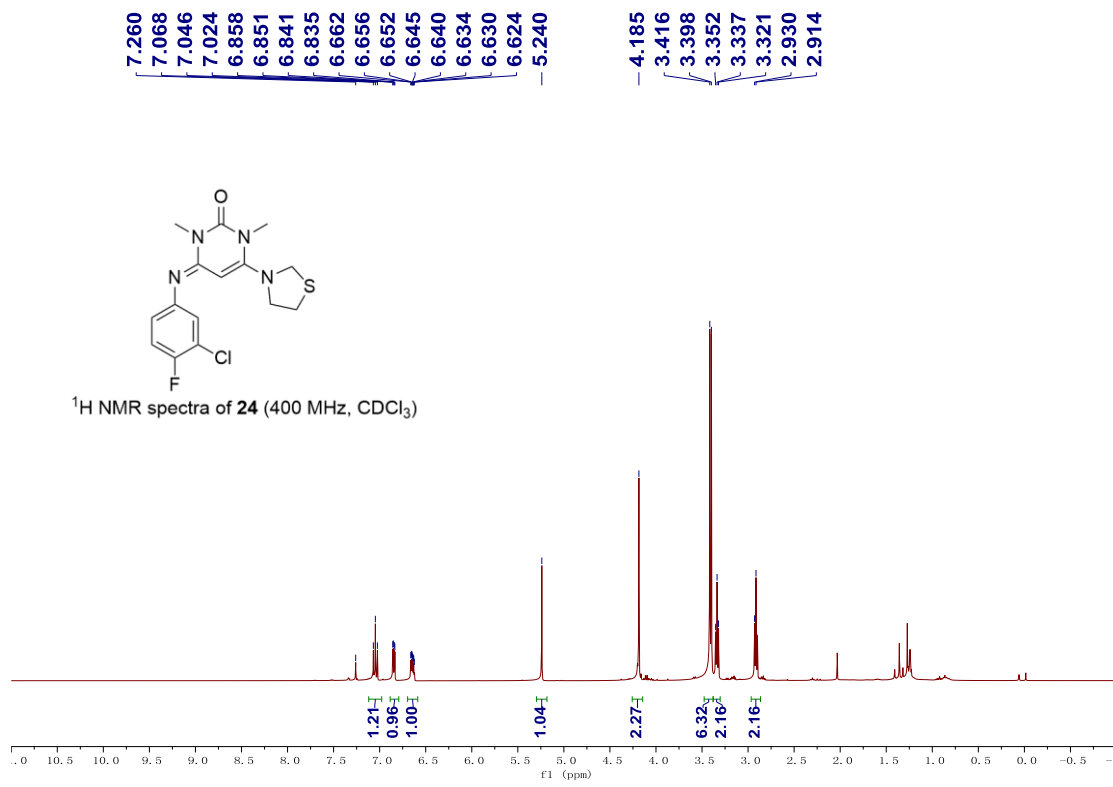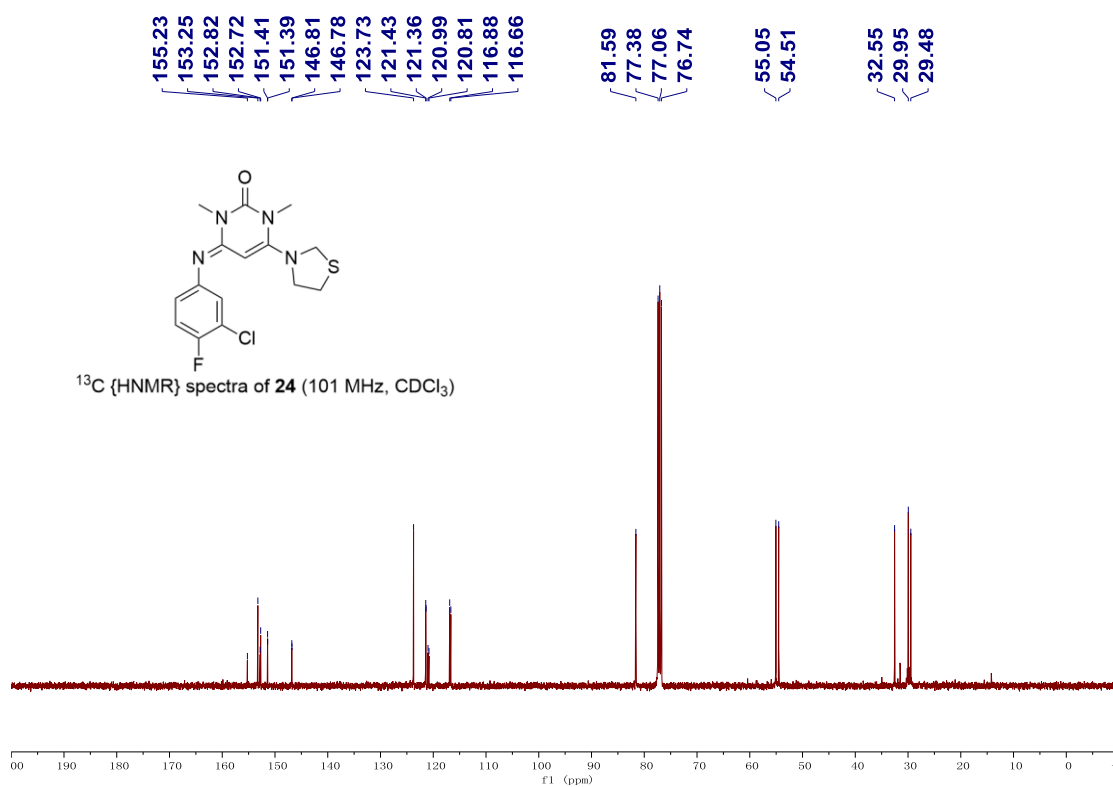

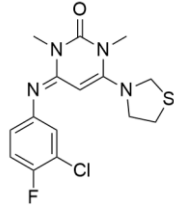

<sup>19</sup>F NMR spectra of **24** (400 MHz, CDCl<sub>3</sub>)

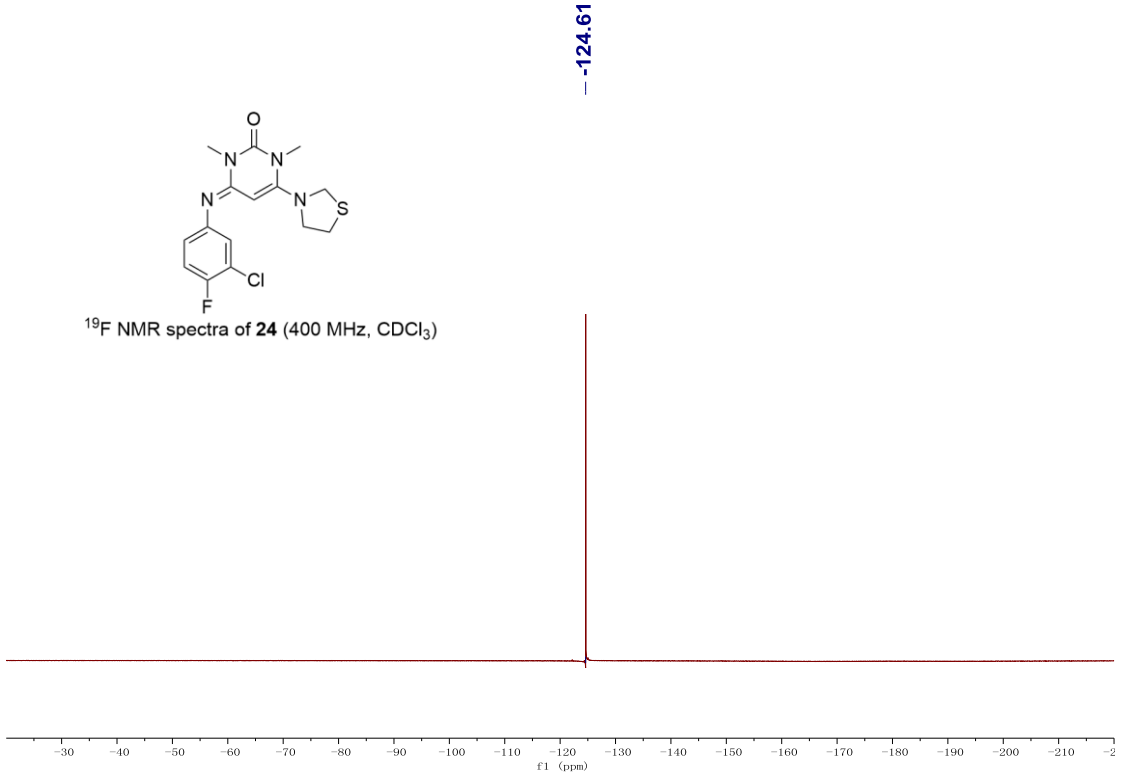

20220104-pos-18 #34 RT: 0.25 AV: 1 NL: 9.33E6  
T: FTMS + p ESI Full ms [200.0000-800.0000]

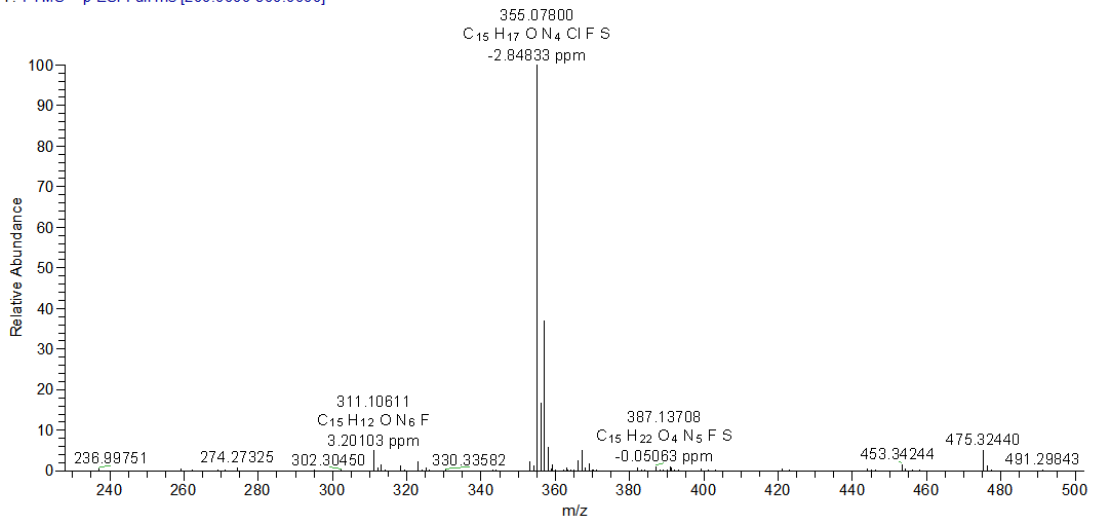

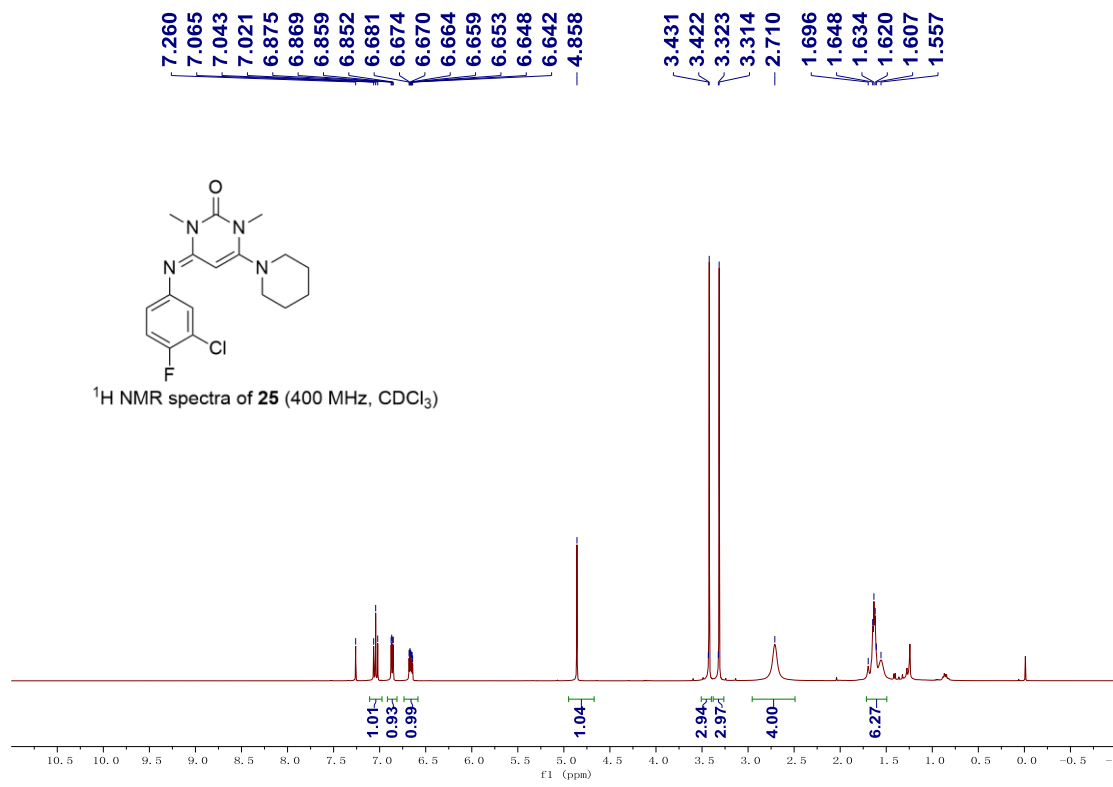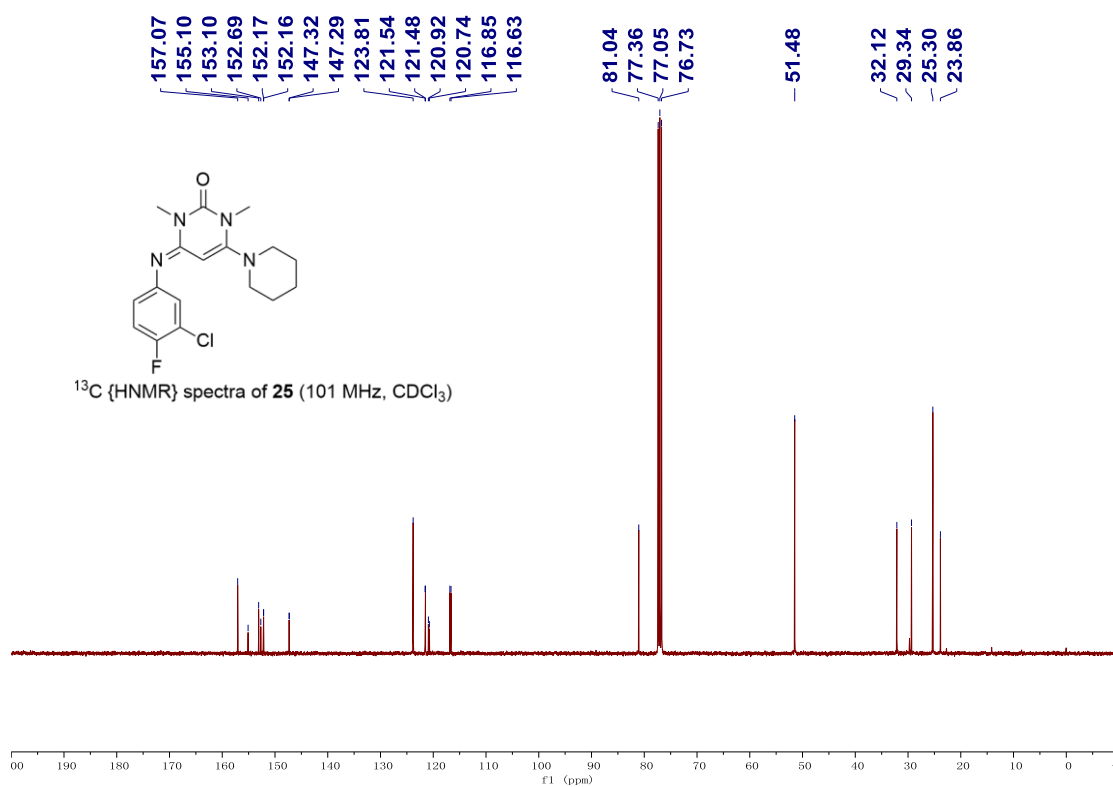

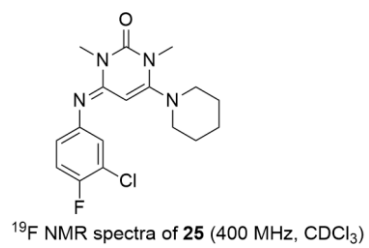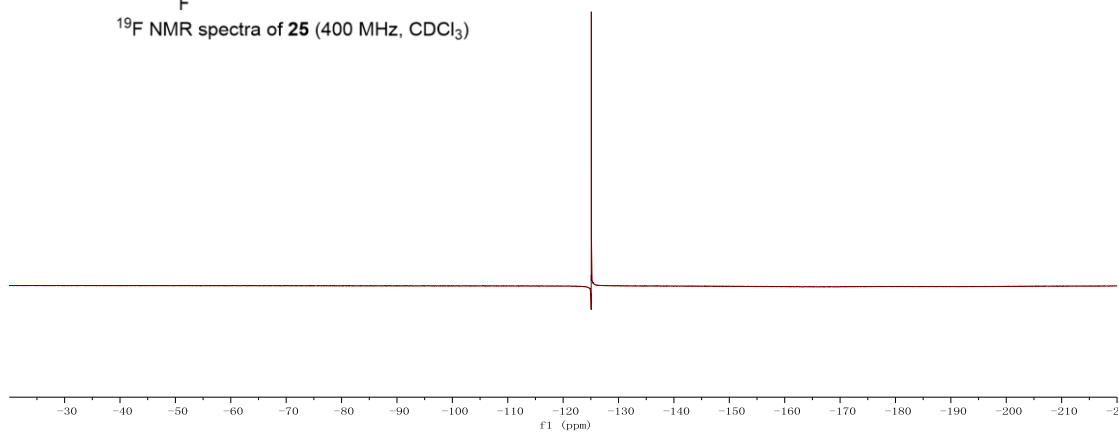

11.

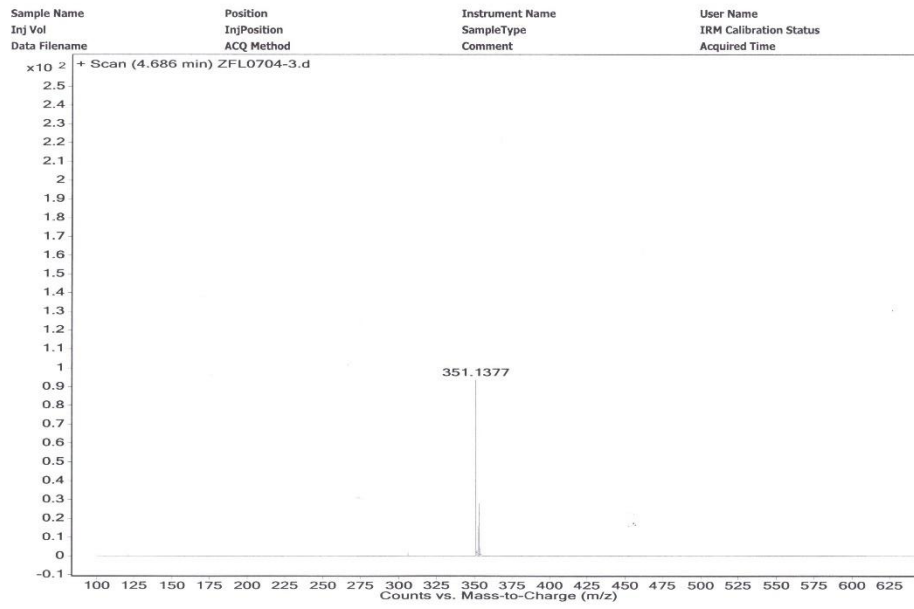



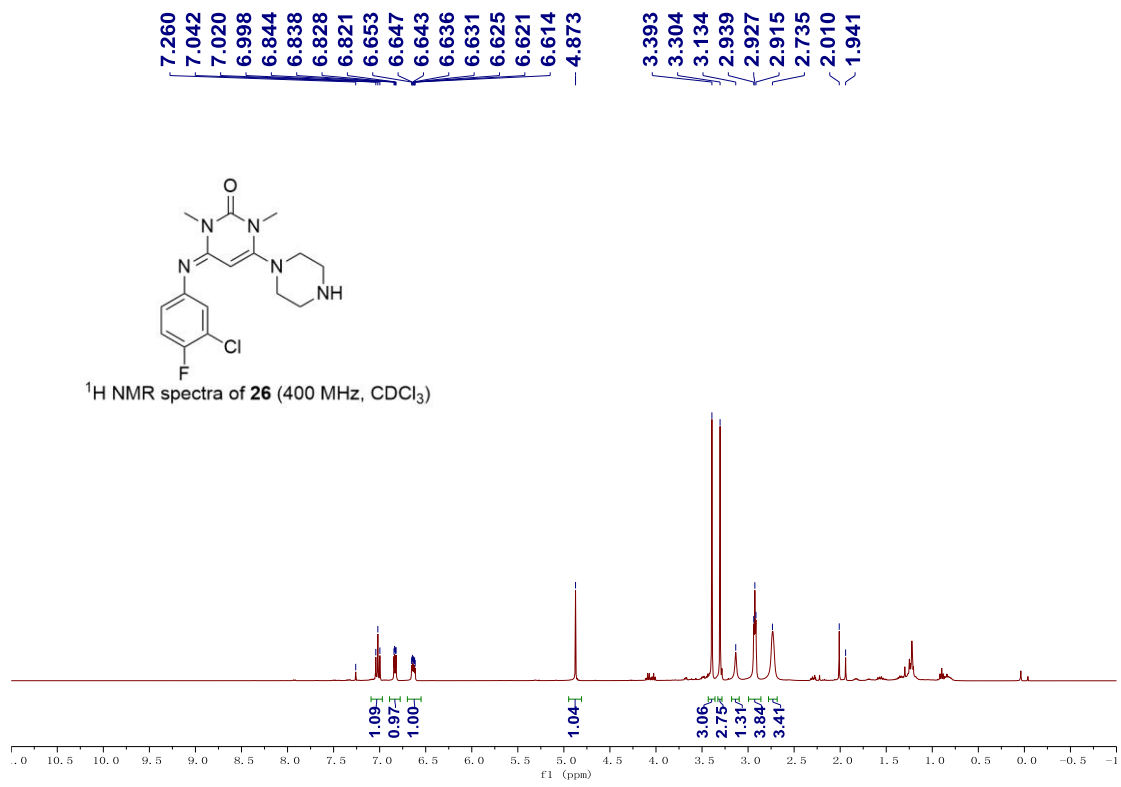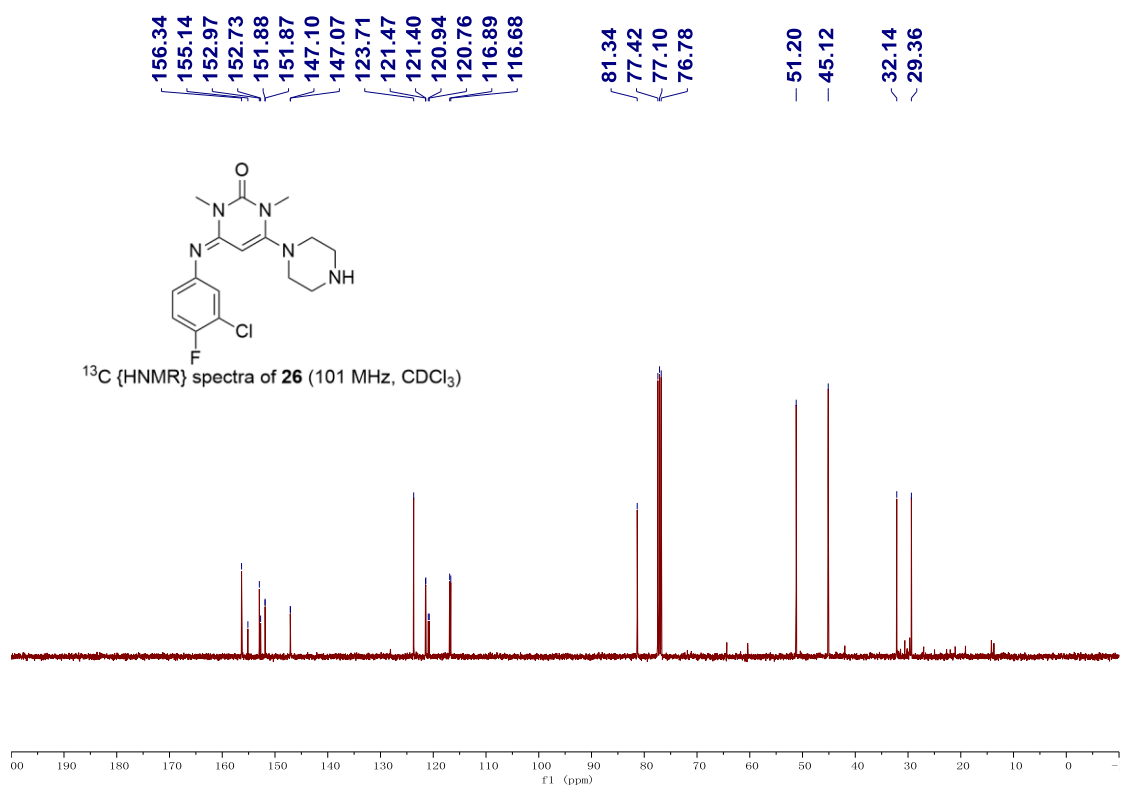

C

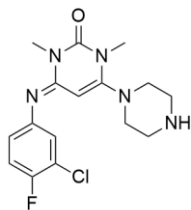

<sup>19</sup>F NMR spectra of **26** (400 MHz, CDCl<sub>3</sub>)

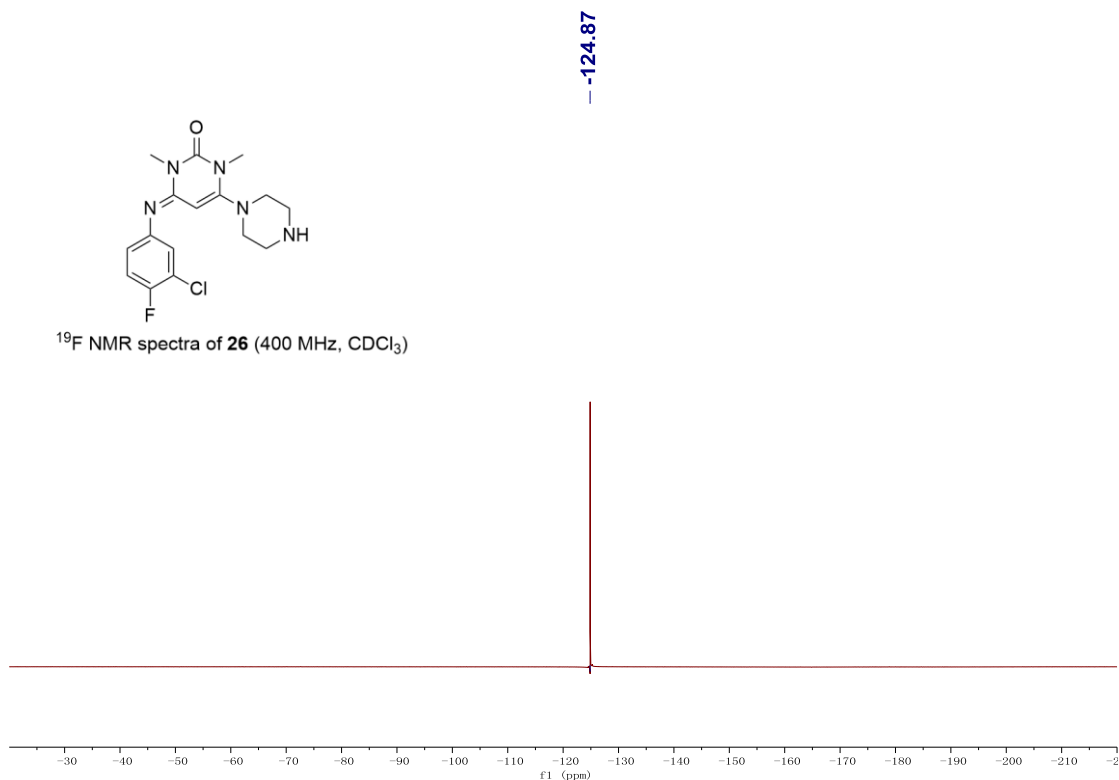

20220104-pos-12 #38 RT: 0.28 AV: 1 NL: 9.68E6  
T: FTMS + p ESI Full ms [200.0000-800.0000]

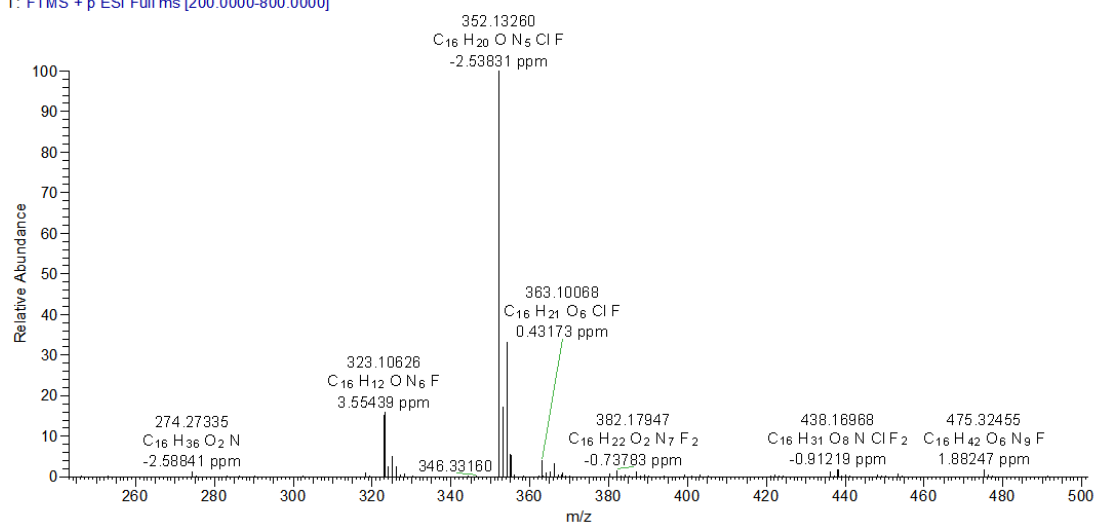

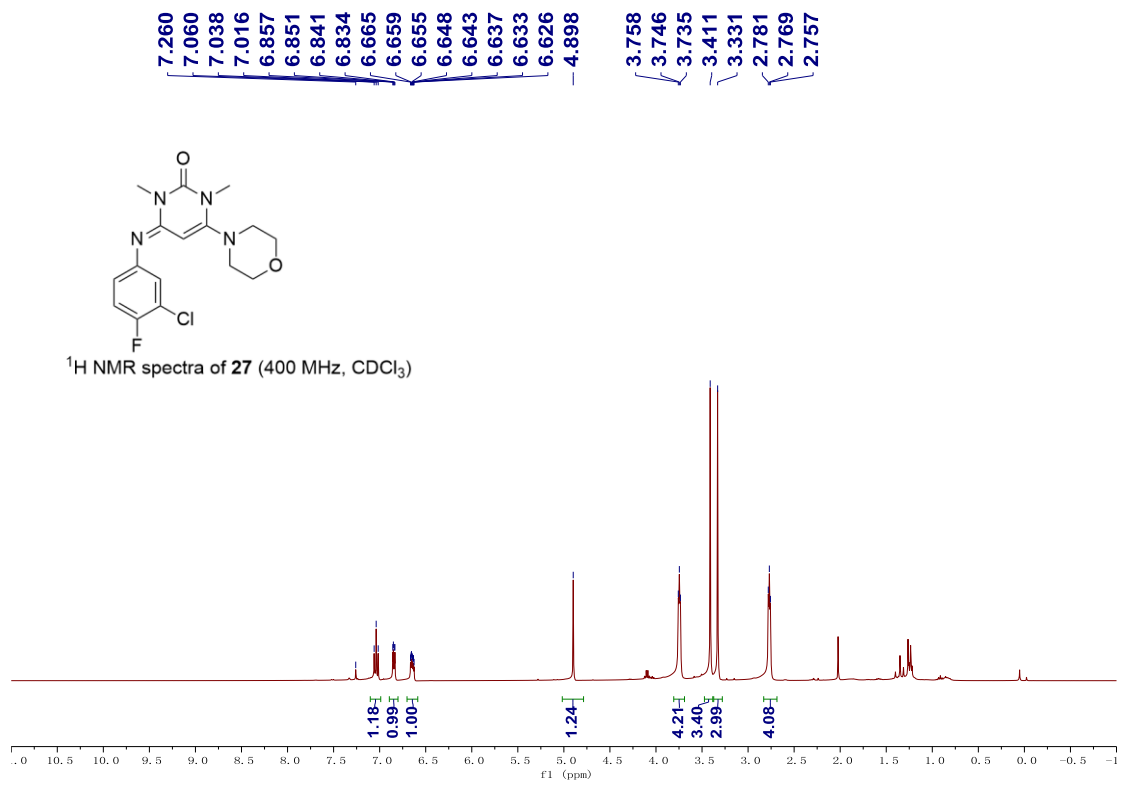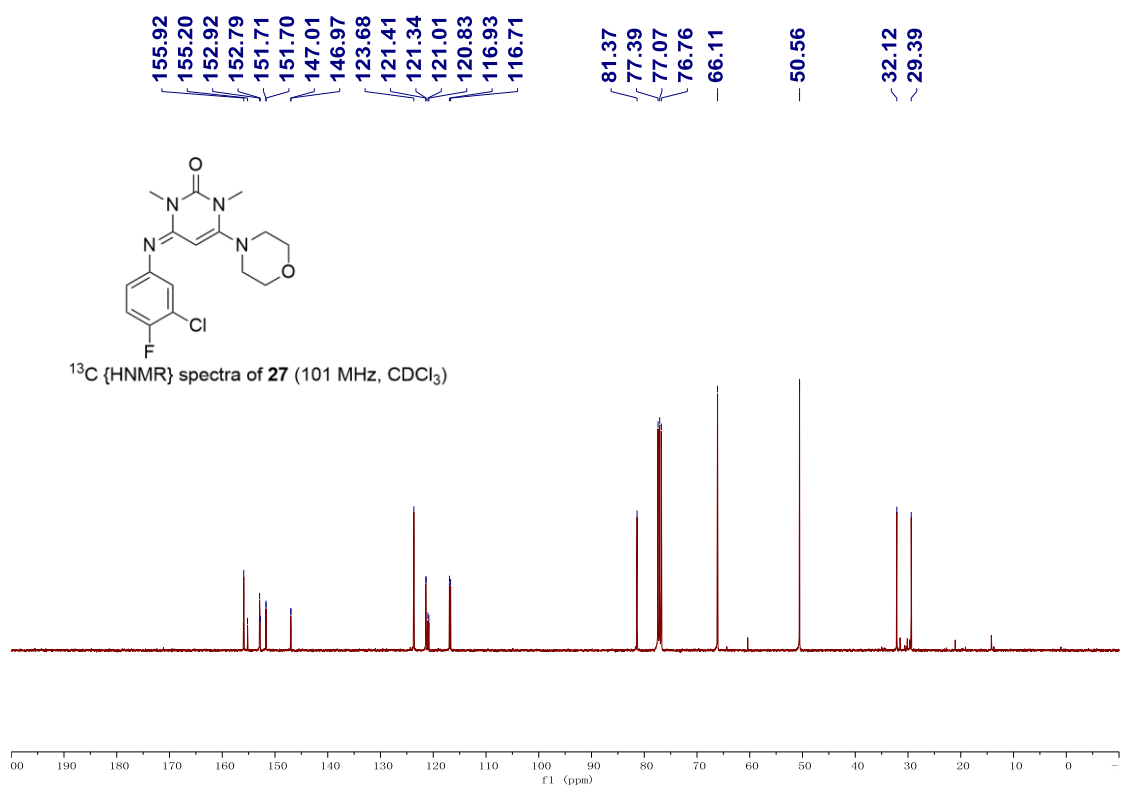

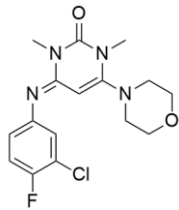

<sup>19</sup>F NMR spectra of 27 (400 MHz, CDCl<sub>3</sub>)

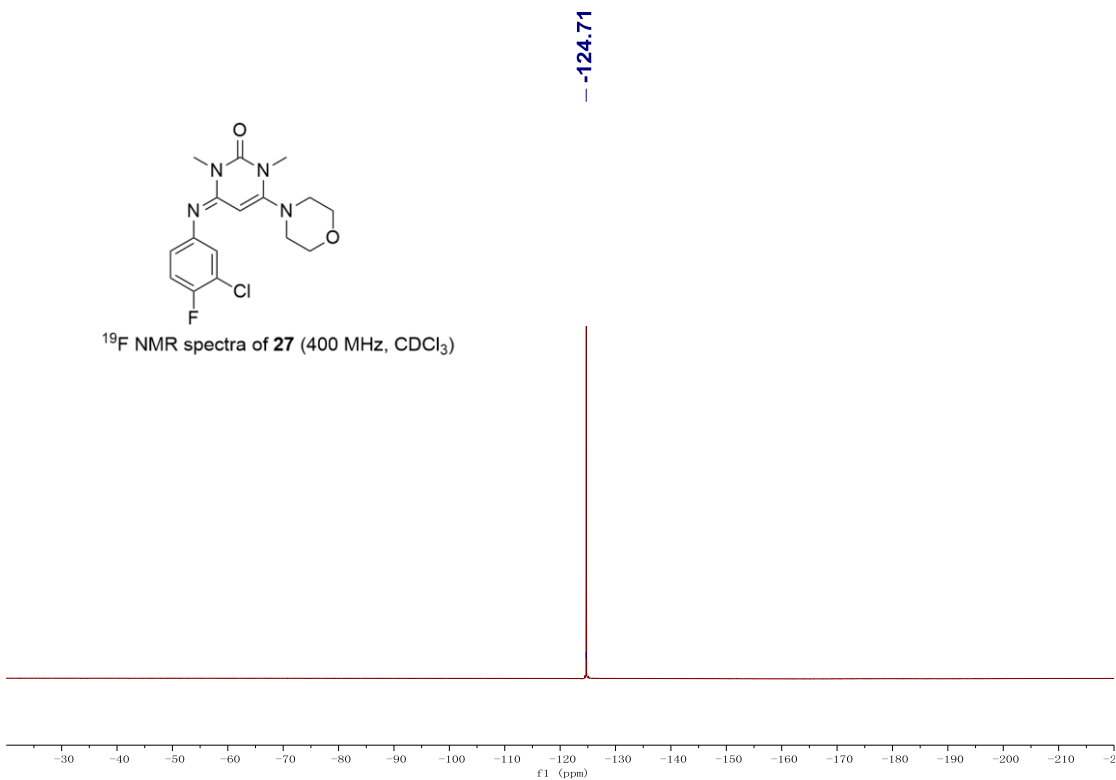

20220104-pos-16 #36 RT: 0.25 AV: 1 NL: 8.85E6  
T: FTMS + p ESI Full ms [200.0000-800.0000]

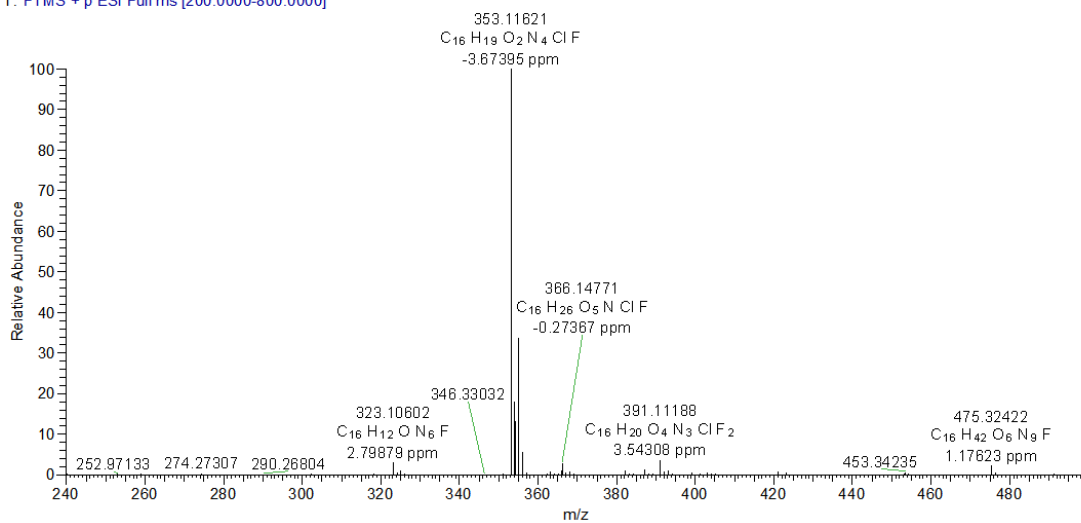

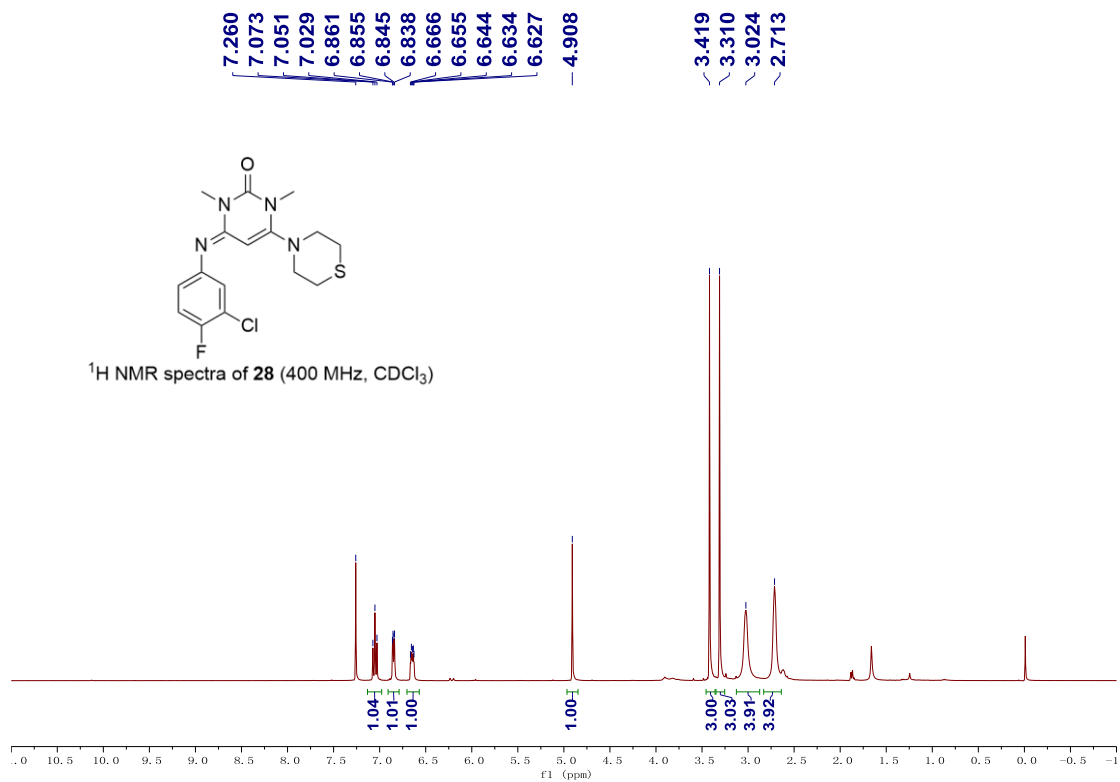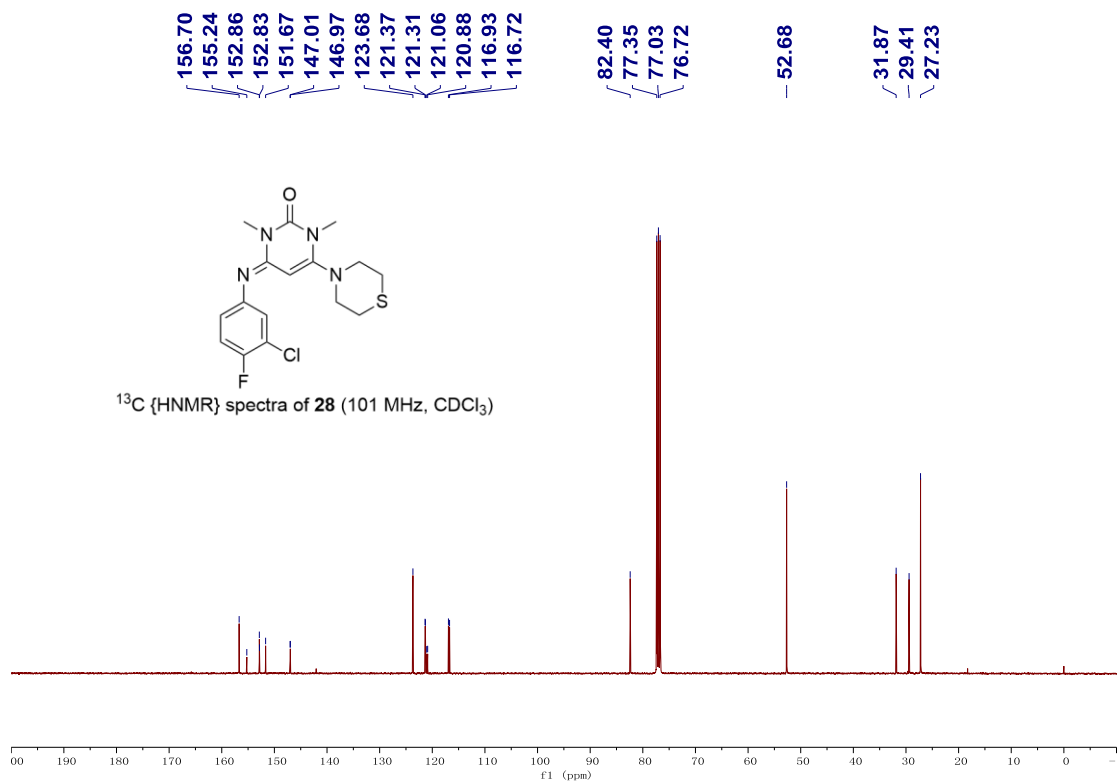

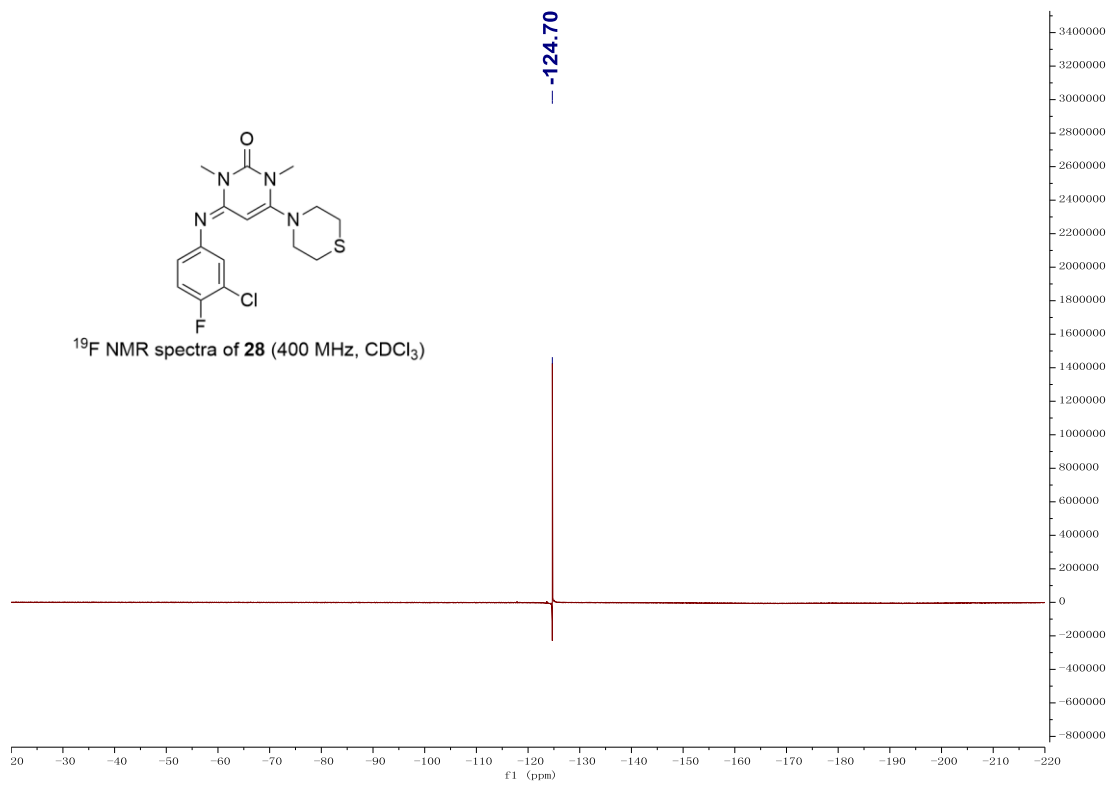

19

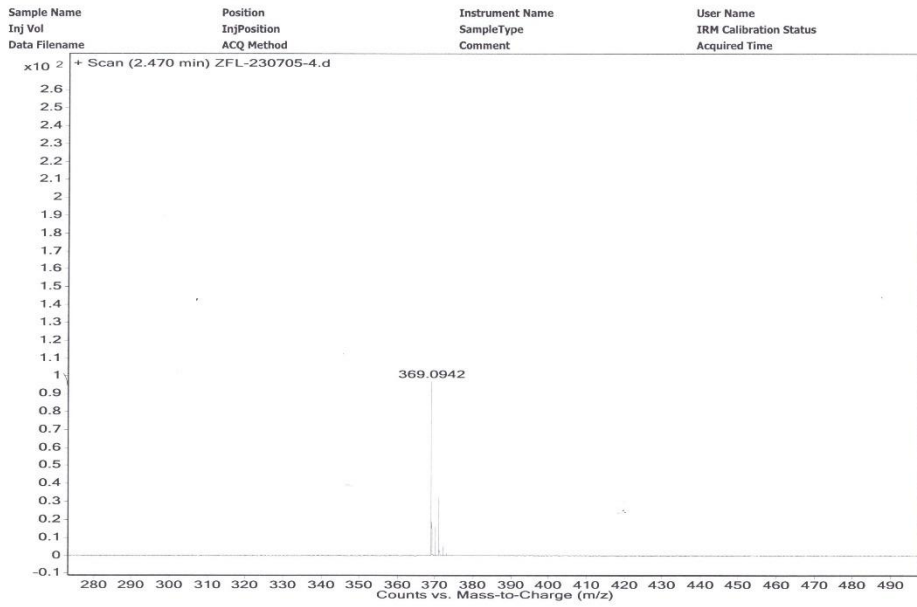

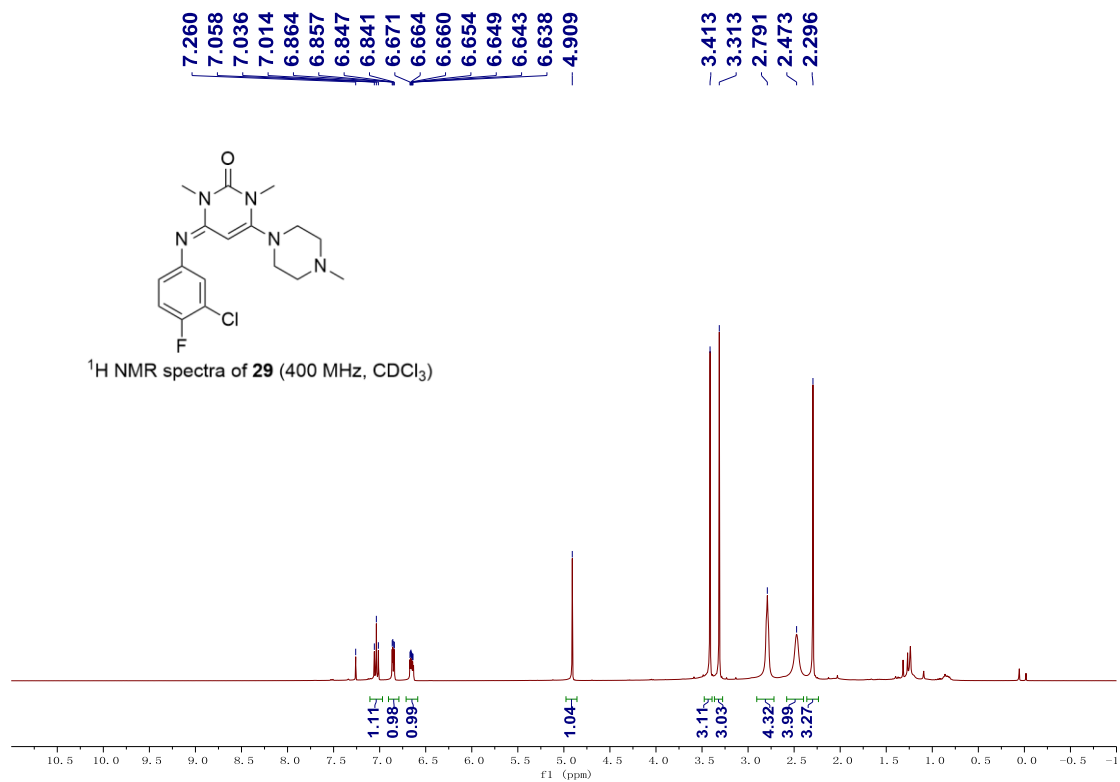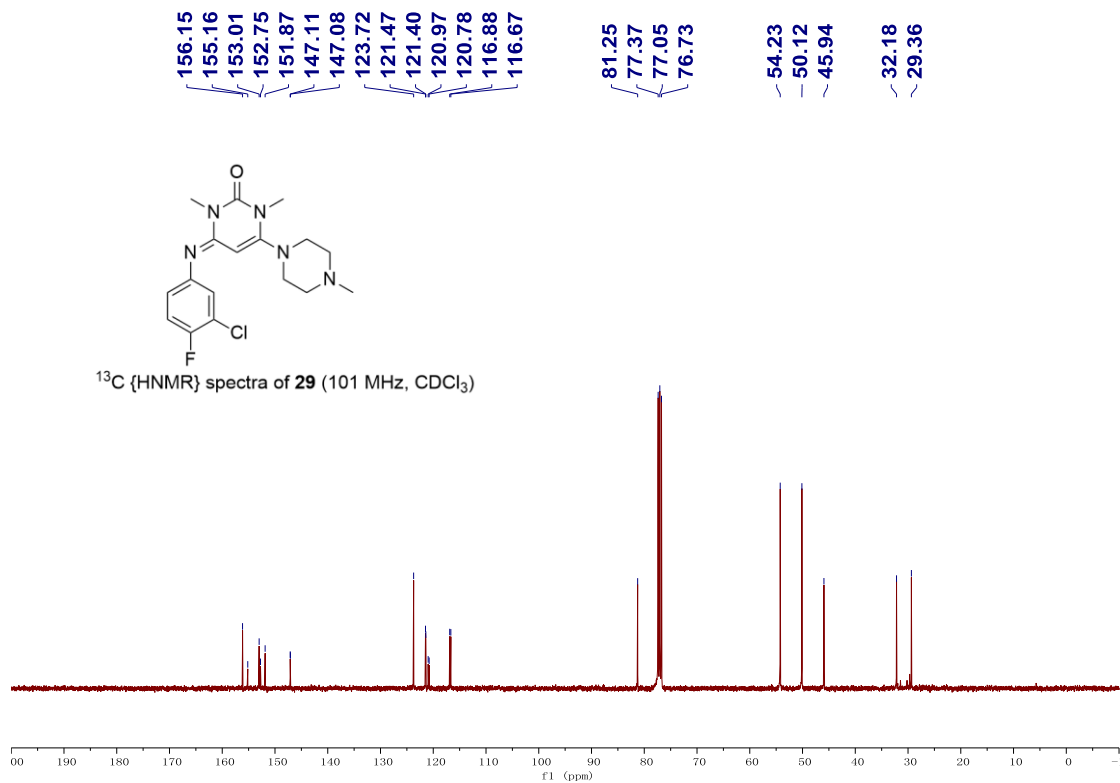



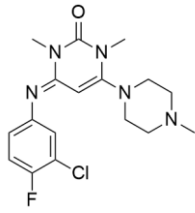

<sup>19</sup>F NMR spectra of **29** (400 MHz, CDCl<sub>3</sub>)

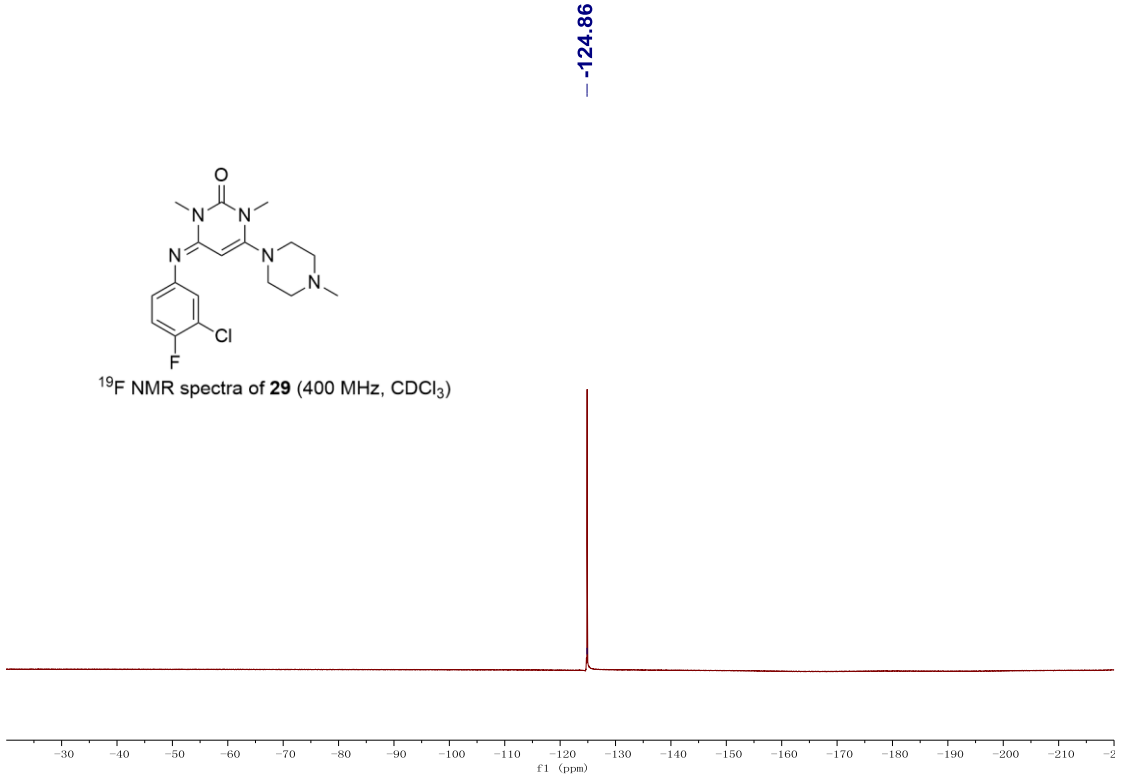

20220104-pos-2 #14 RT: 0.10 AV: 1 NL: 9.20E6  
T: FTMS + p ESI Full ms [200.0000-800.0000]

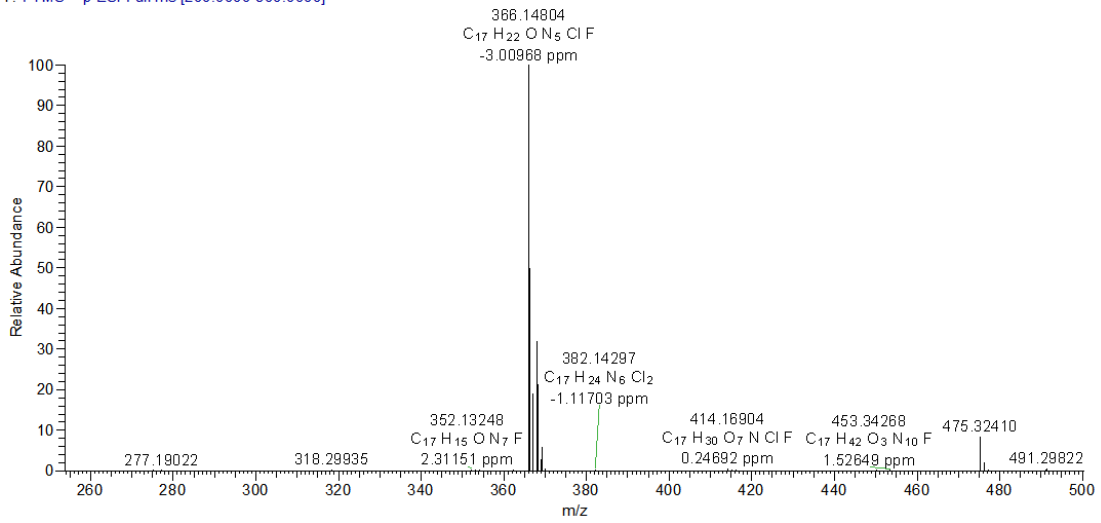

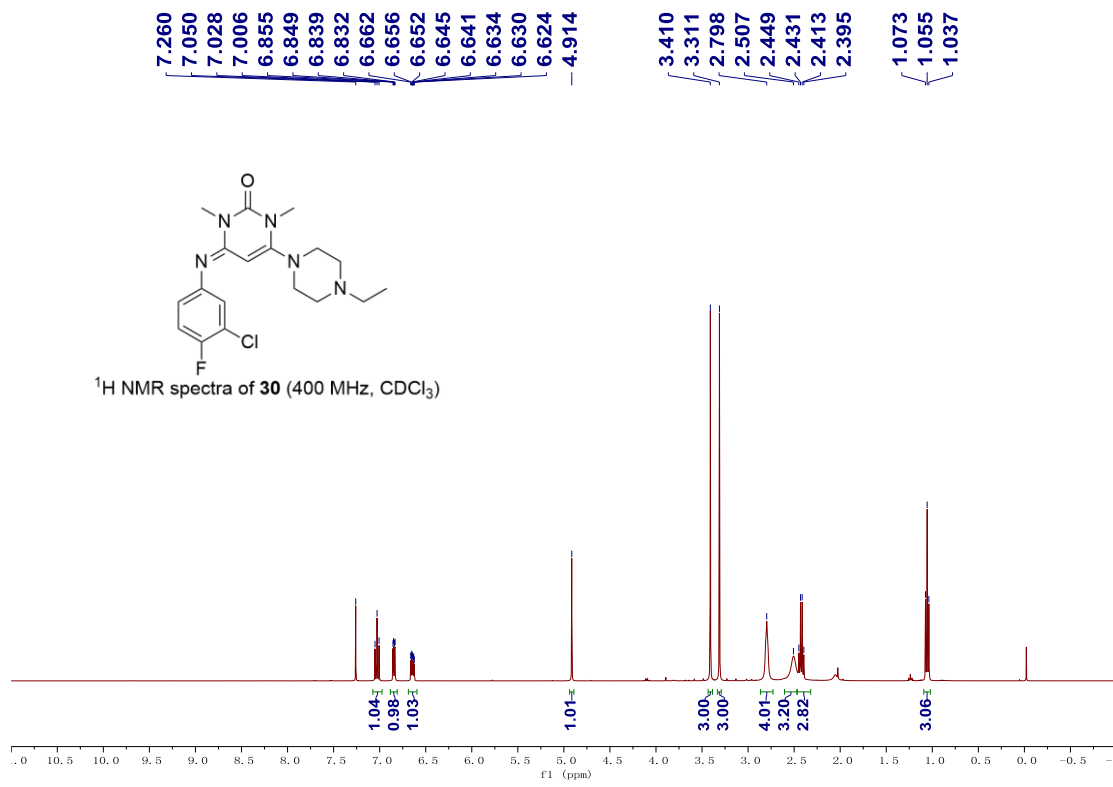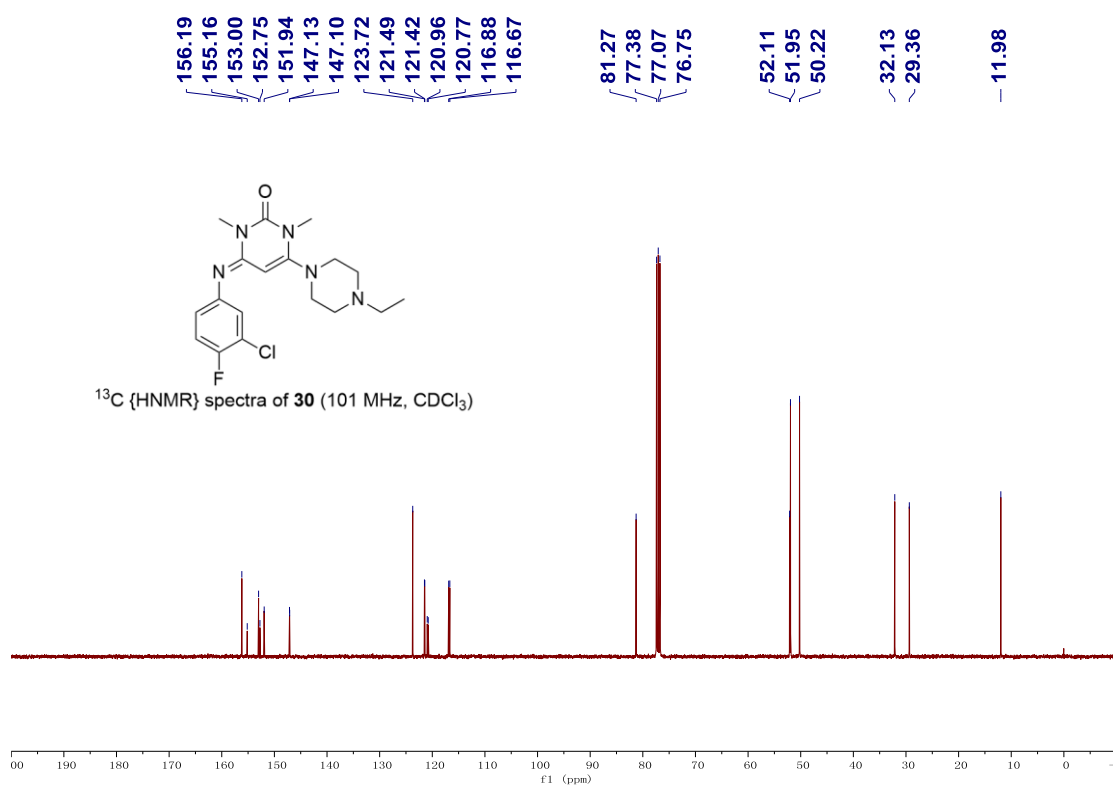

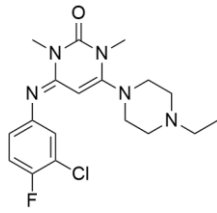

<sup>19</sup>F NMR spectra of **30** (400 MHz, CDCl<sub>3</sub>)

-124.88

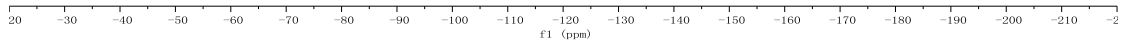

20220104-pos-20 #32 RT: 0.22 AV: 1 NL: 1.37E7  
T: FTMS + p ESI Full ms [200.0000-800.0000]

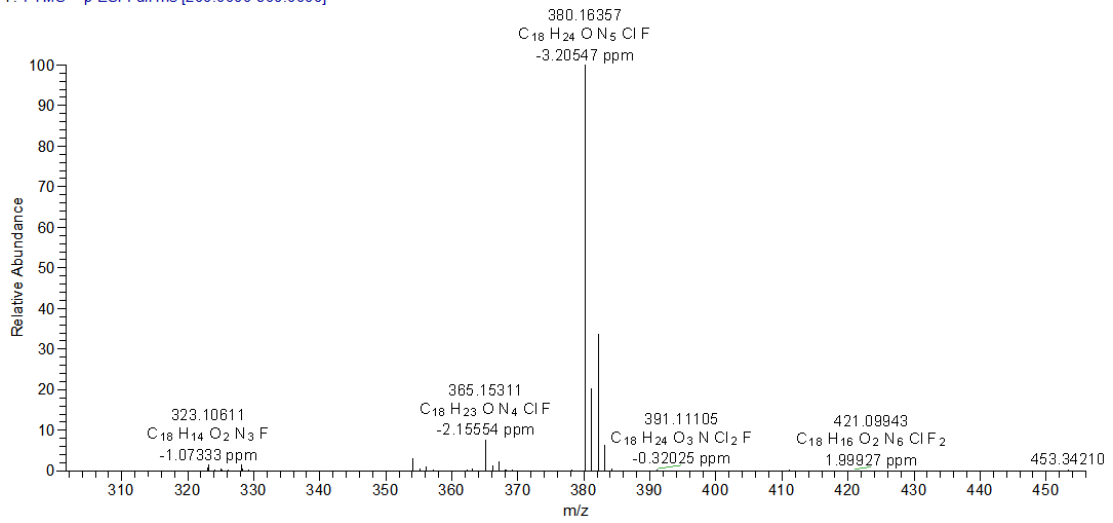

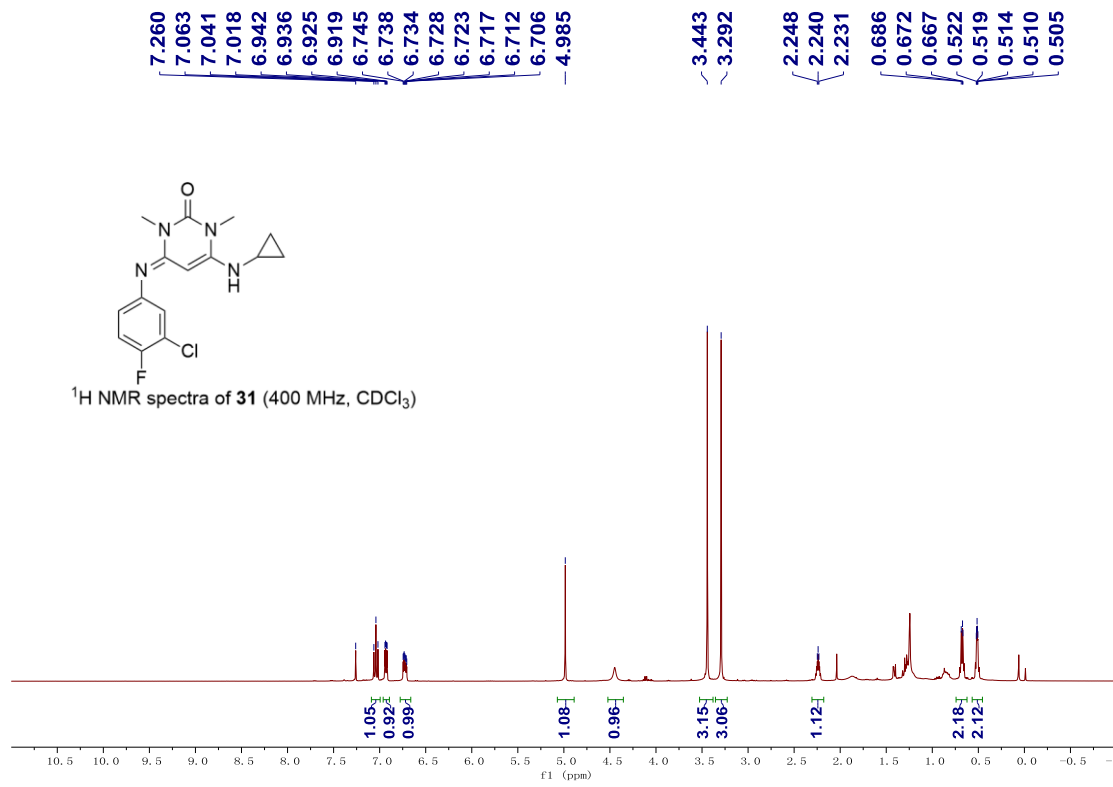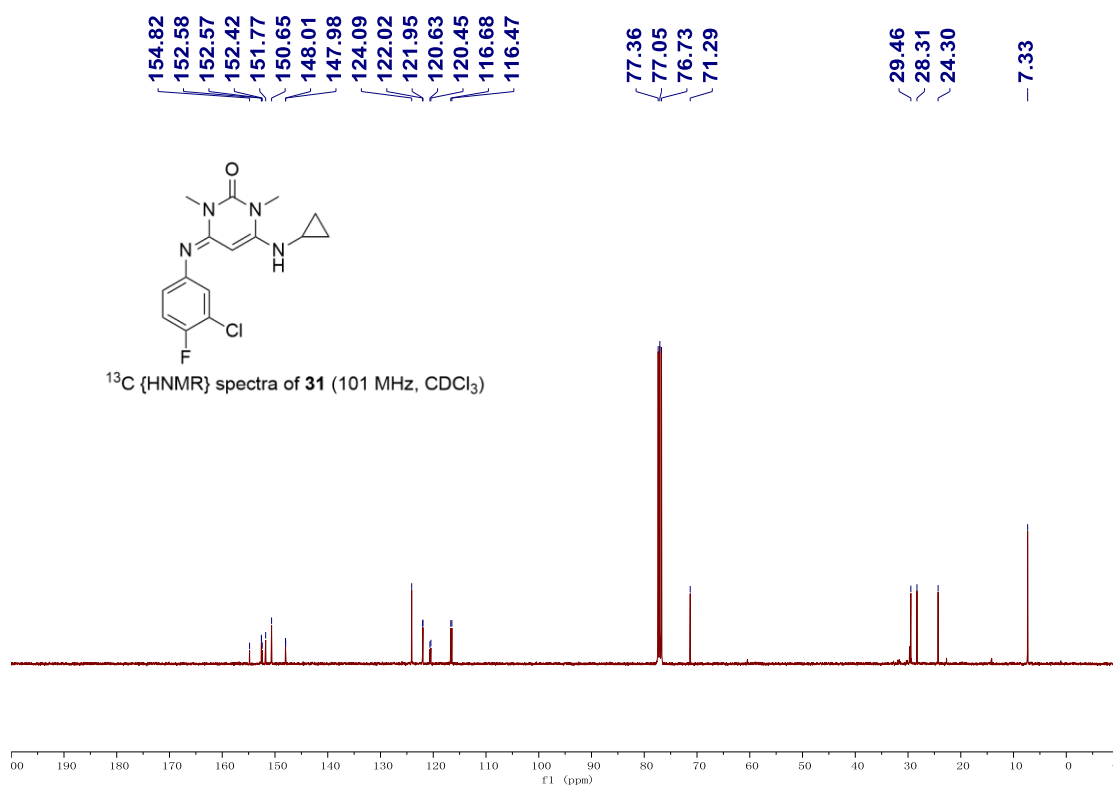

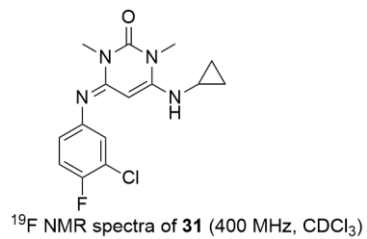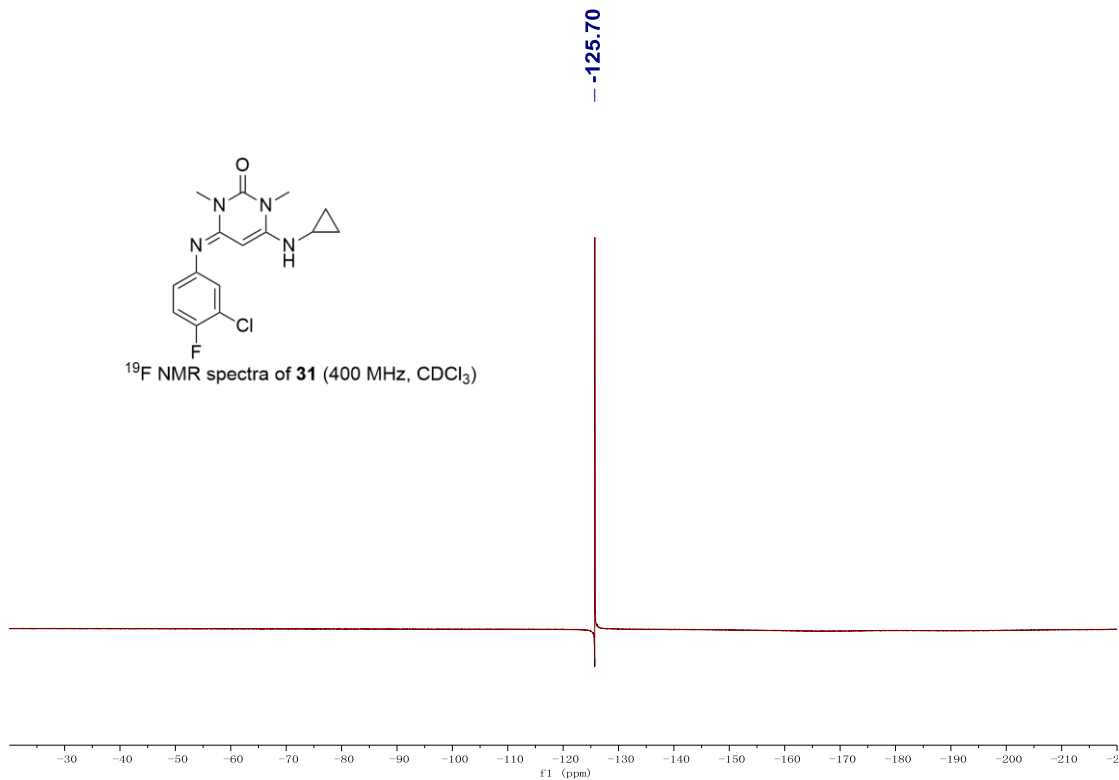

20220104-pos-11 #30 RT: 0.22 AV: 1 NL: 1.04E7  
 T: FTMS + p ESI Full ms [200.0000-800.0000]

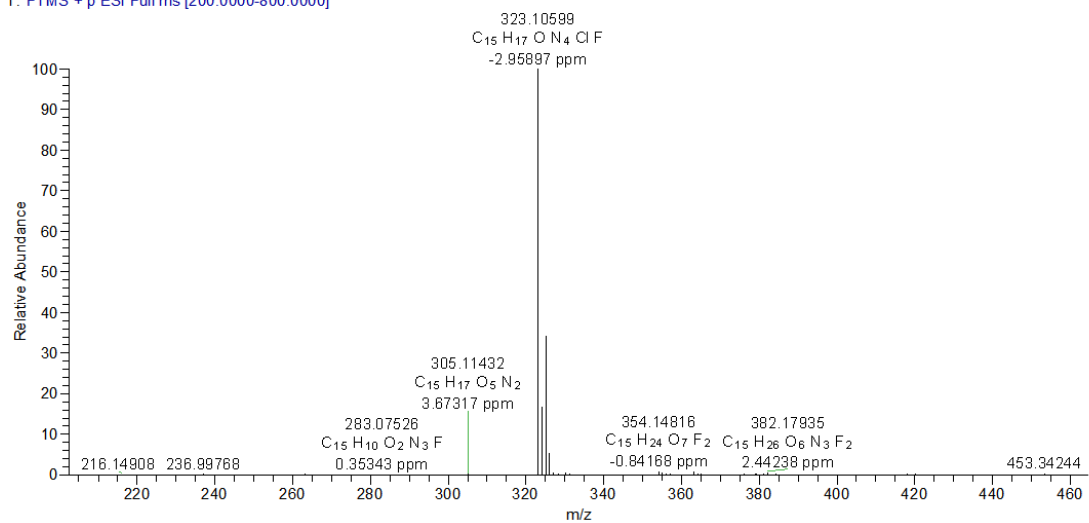

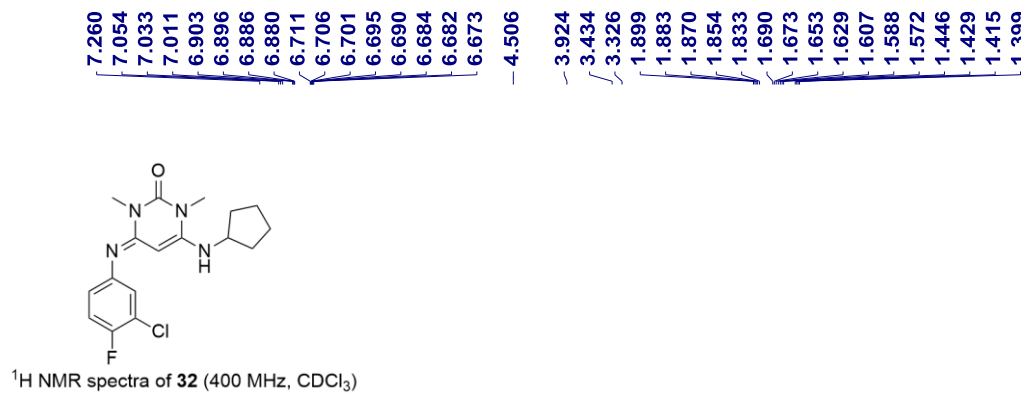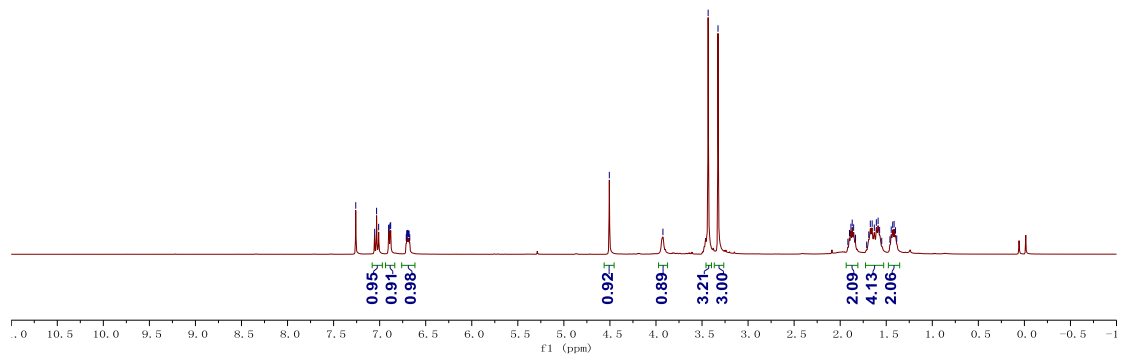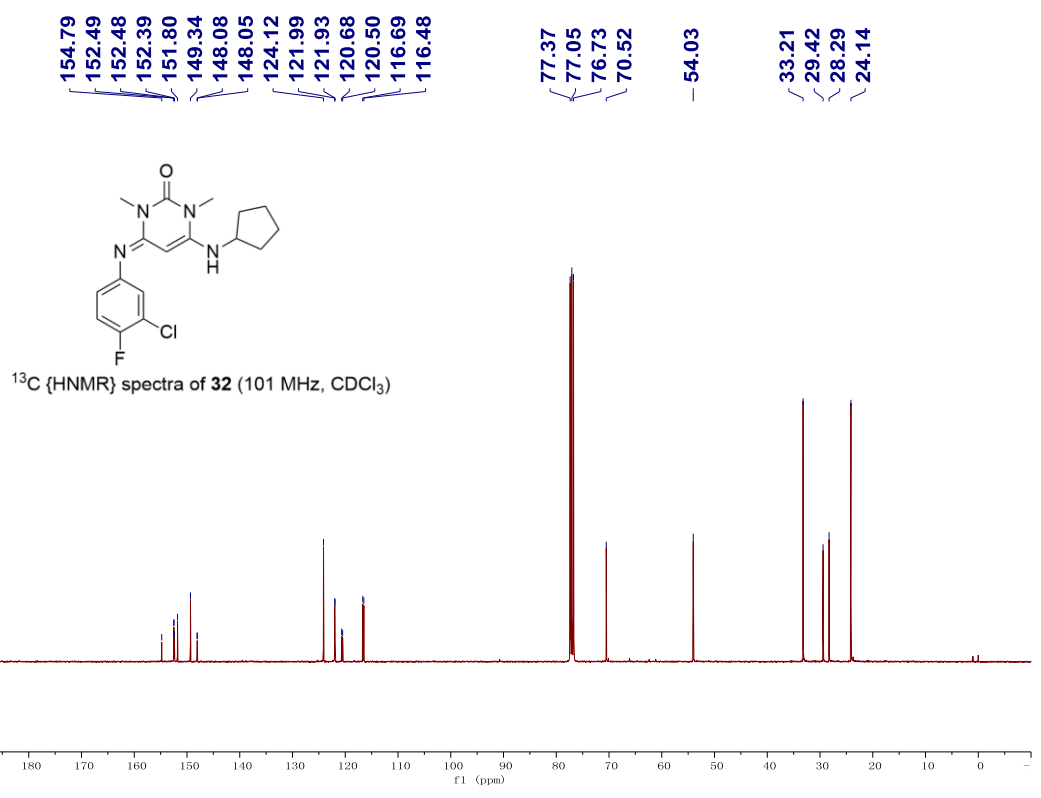

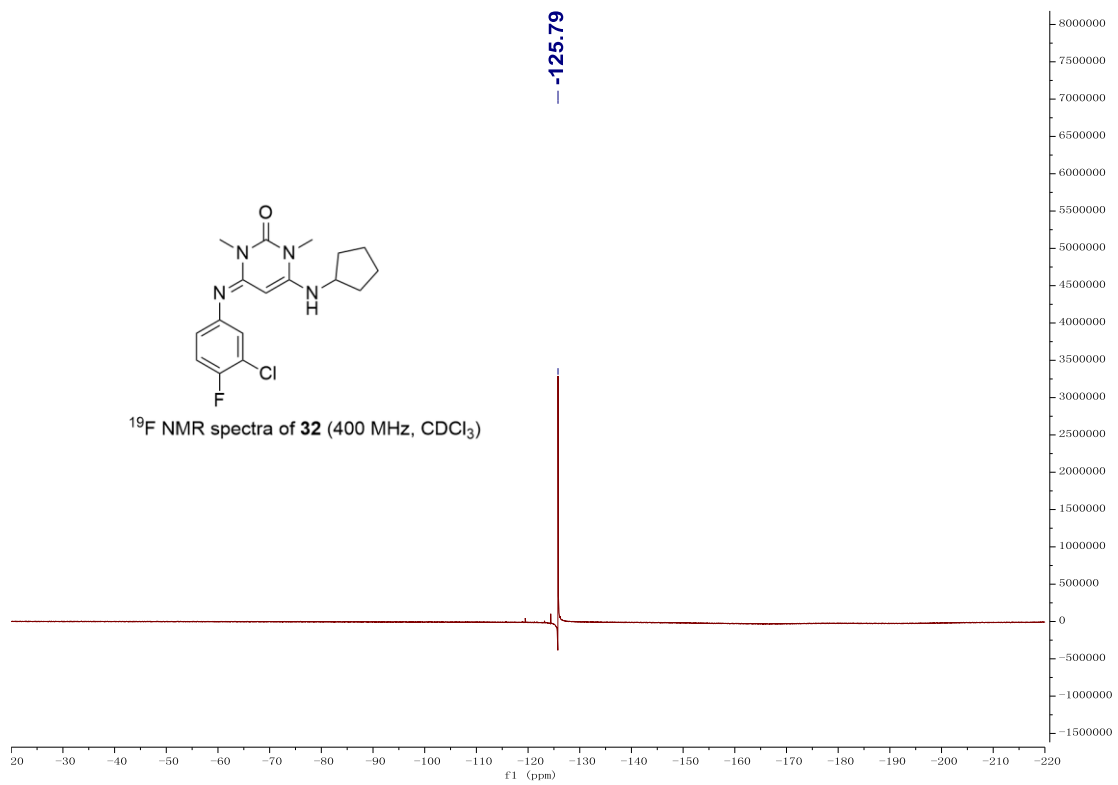

16.

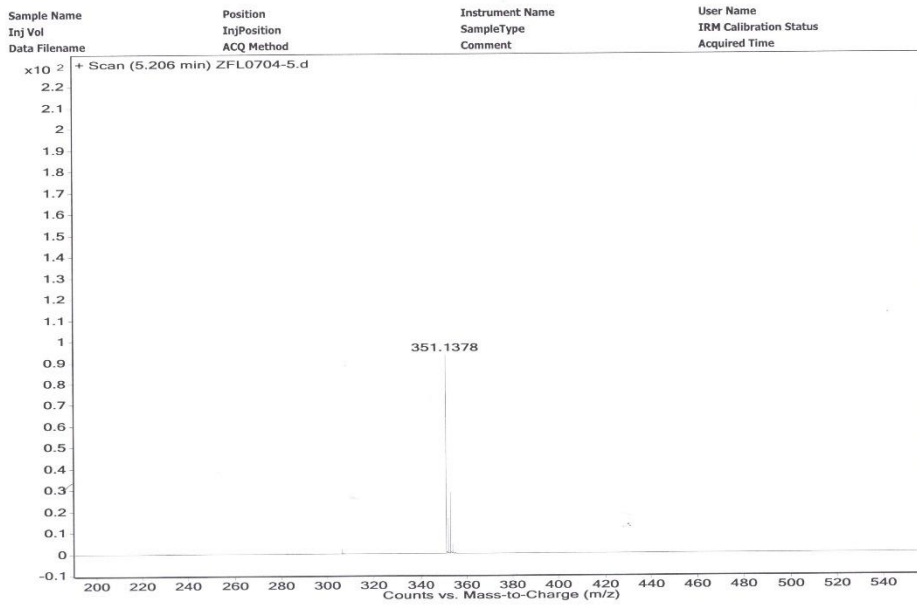



7.260  
7.051  
7.029  
7.007  
6.886  
6.880  
6.870  
6.863  
6.699  
6.693  
6.688  
6.682  
6.677  
6.671  
6.667  
6.660

— 4.532

3.947  
3.938  
3.929  
3.917  
3.908  
3.900  
3.427  
3.354  
1.904  
1.873  
1.494  
1.484  
1.462  
1.457  
1.451  
1.435  
1.265  
1.259  
1.240  
1.235  
1.223

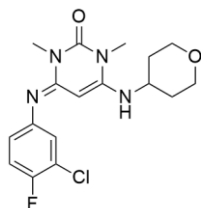

<sup>1</sup>H NMR spectra of **33** (400 MHz, CDCl<sub>3</sub>)

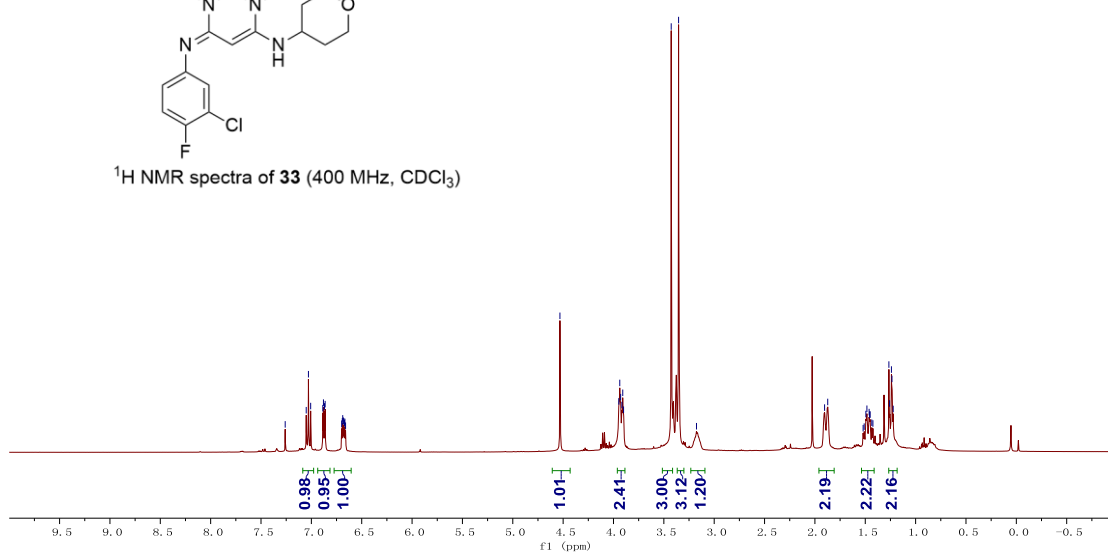

154.83  
152.42  
152.34  
152.33  
151.75  
148.42  
147.82  
147.79  
124.03  
121.97  
121.91  
120.68  
120.50  
116.76  
116.55

77.39  
77.07  
76.76  
70.02  
66.11

— 48.79

32.62  
29.47  
28.39

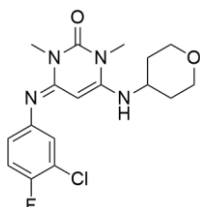

<sup>13</sup>C {HNMR} spectra of **33** (101 MHz, CDCl<sub>3</sub>)

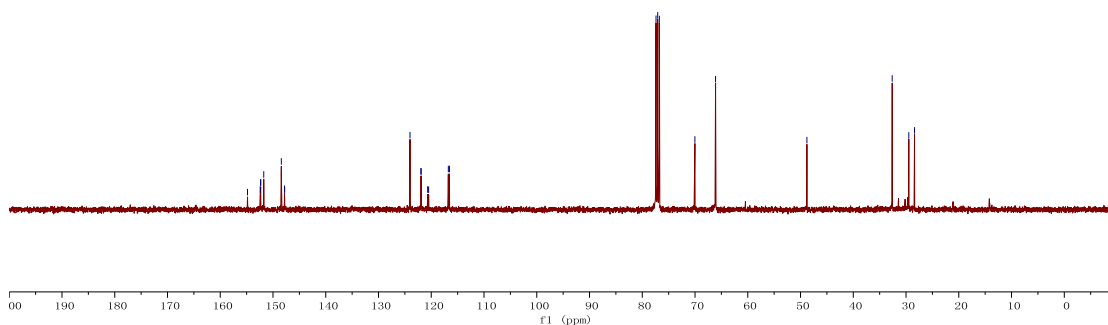

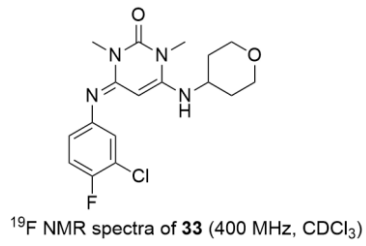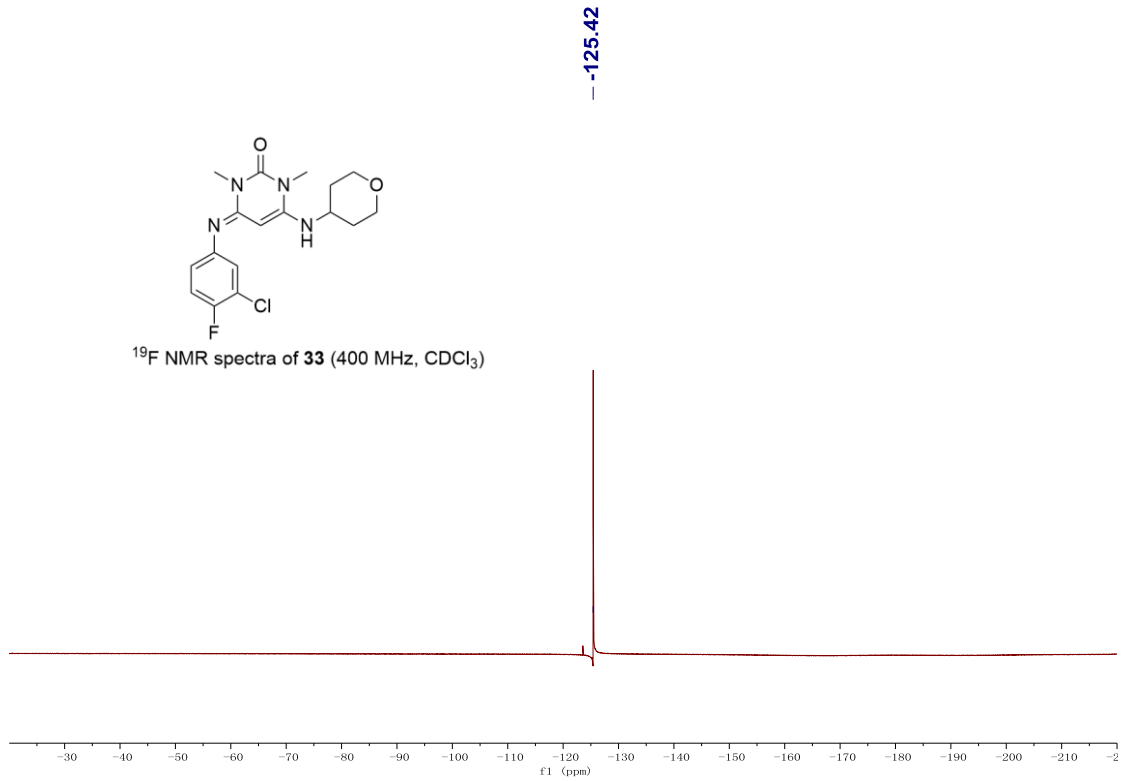

20220104-pos-17 #35 RT: 0.25 AV: 1 NL: 1.14E7  
 T: FTMS + p ESI Full ms [200.0000-800.0000]

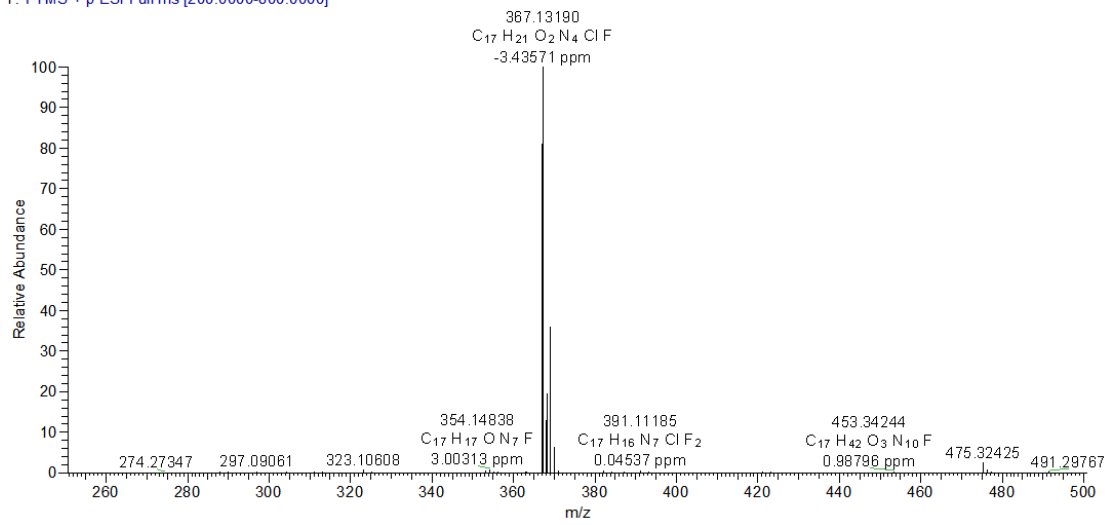

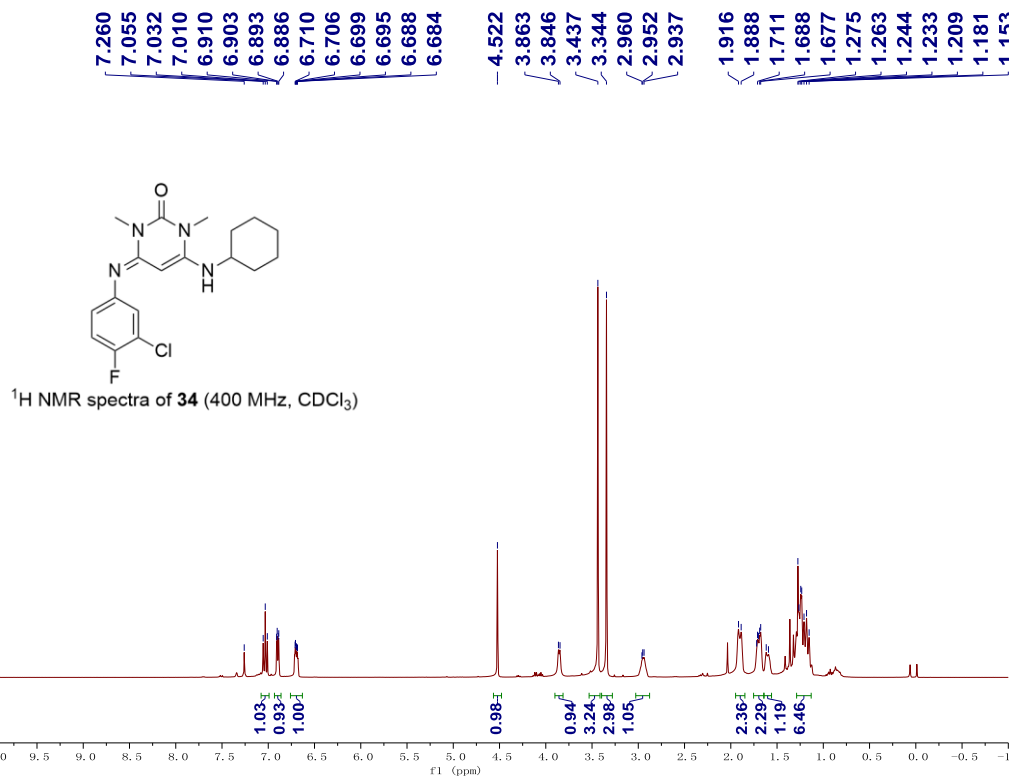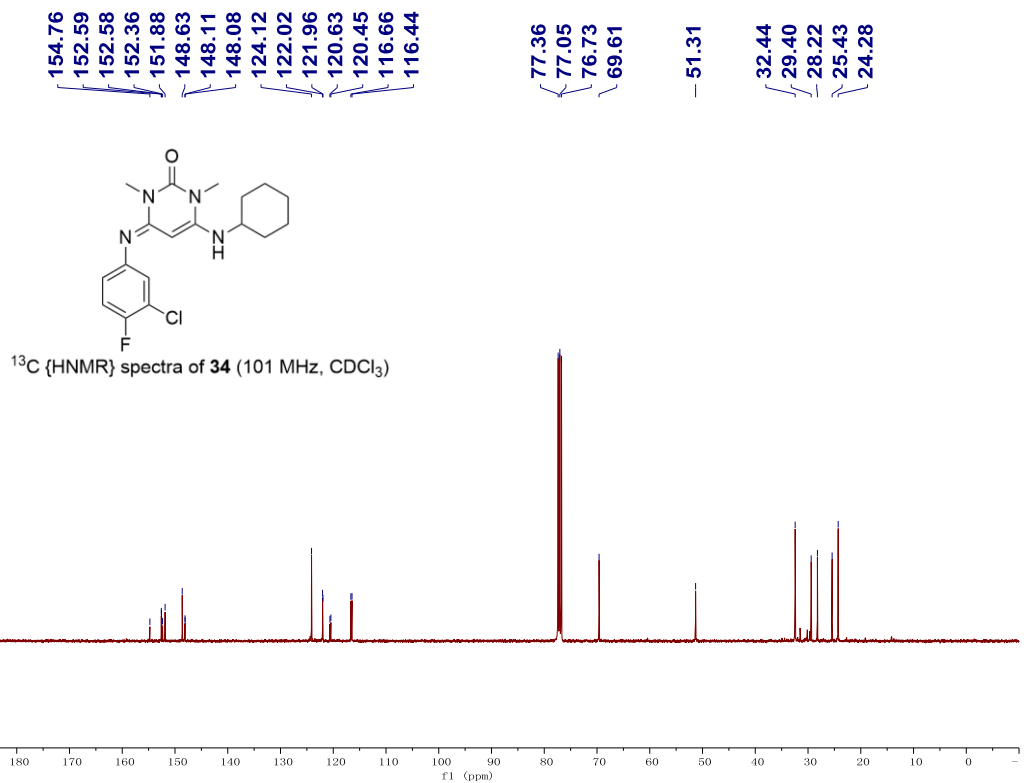

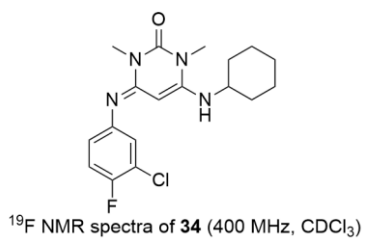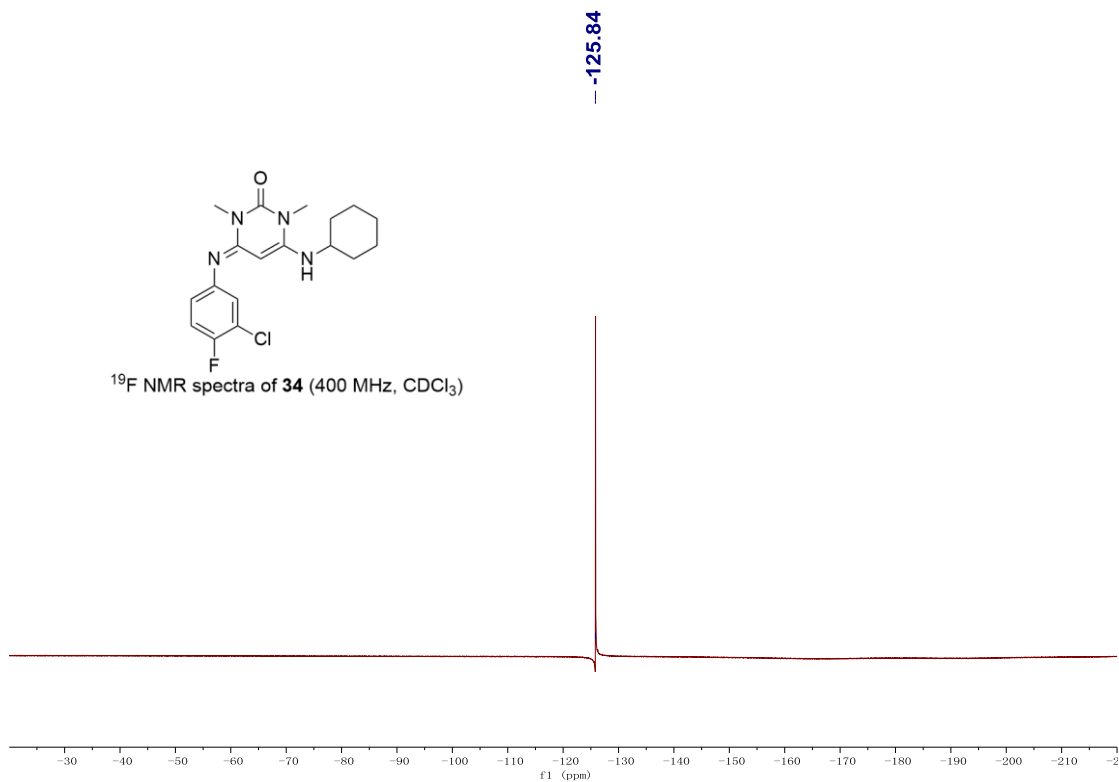

20220104-pos-19 #38 RT: 0.26 AV: 1 NL: 1.33E7  
 T: FTMS + p ESI Full ms [200.0000-800.0000]

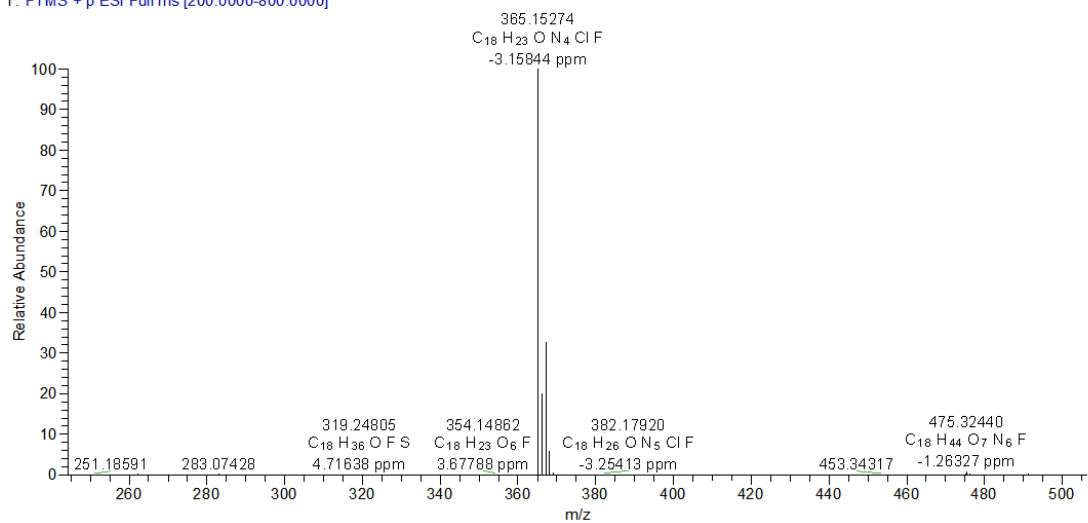

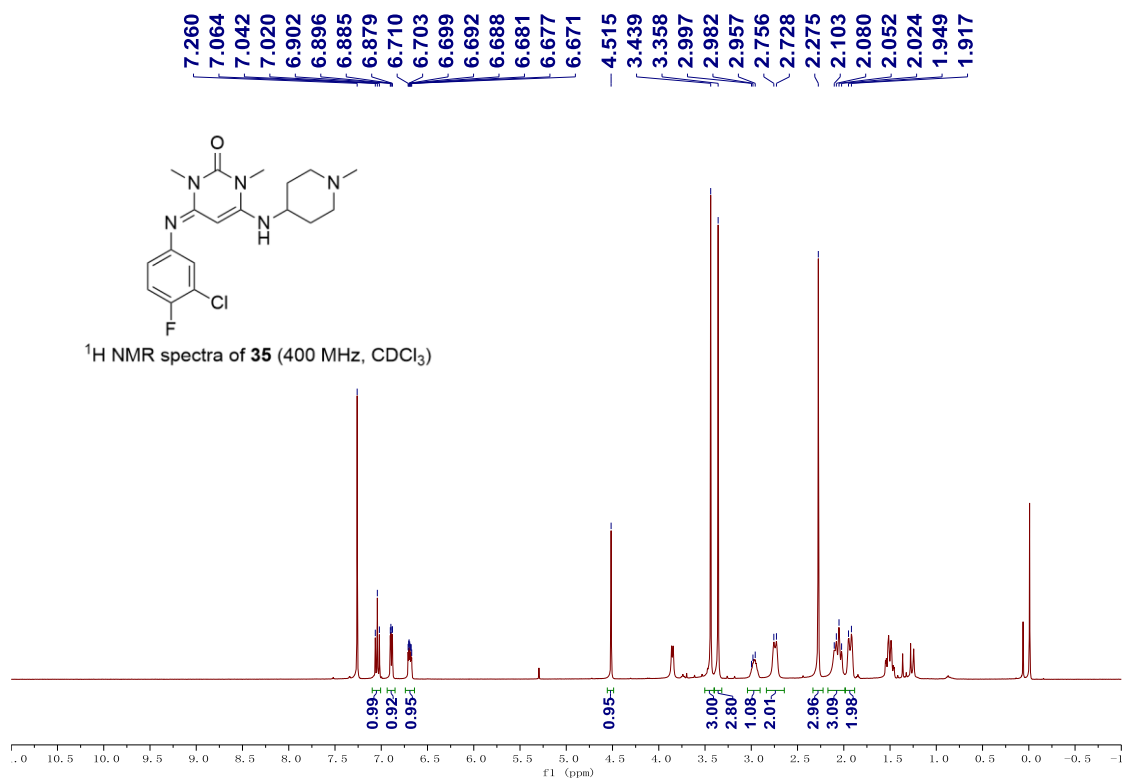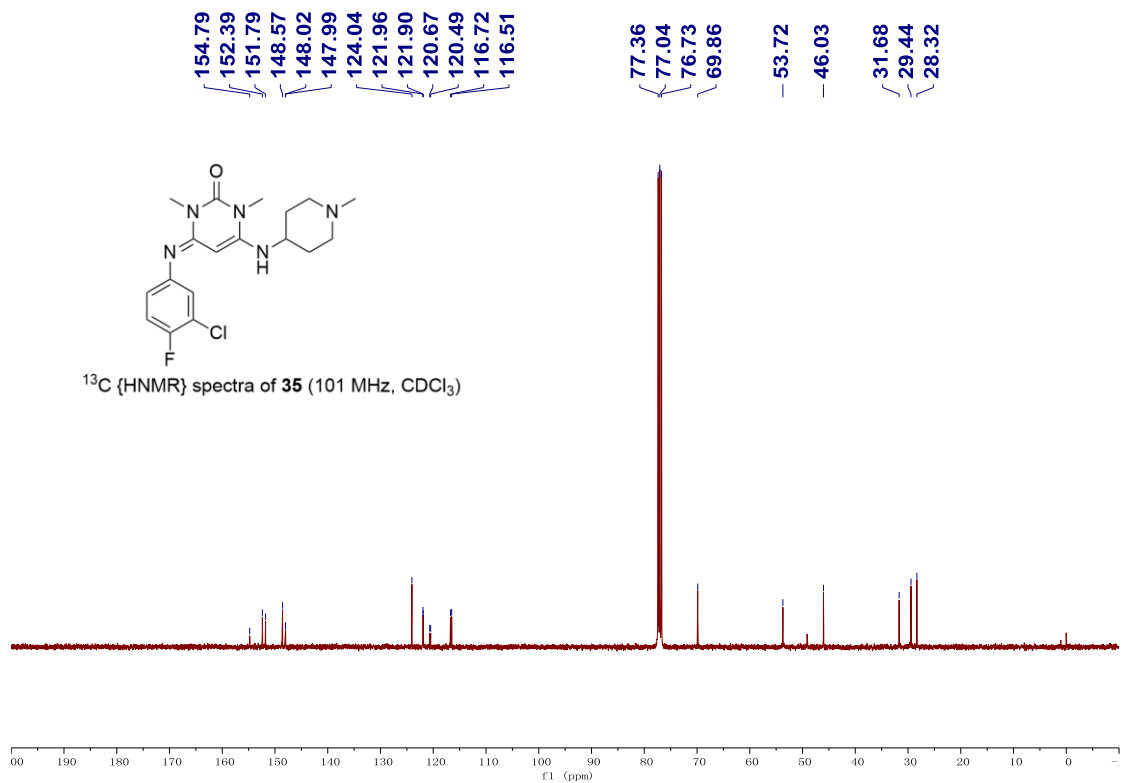

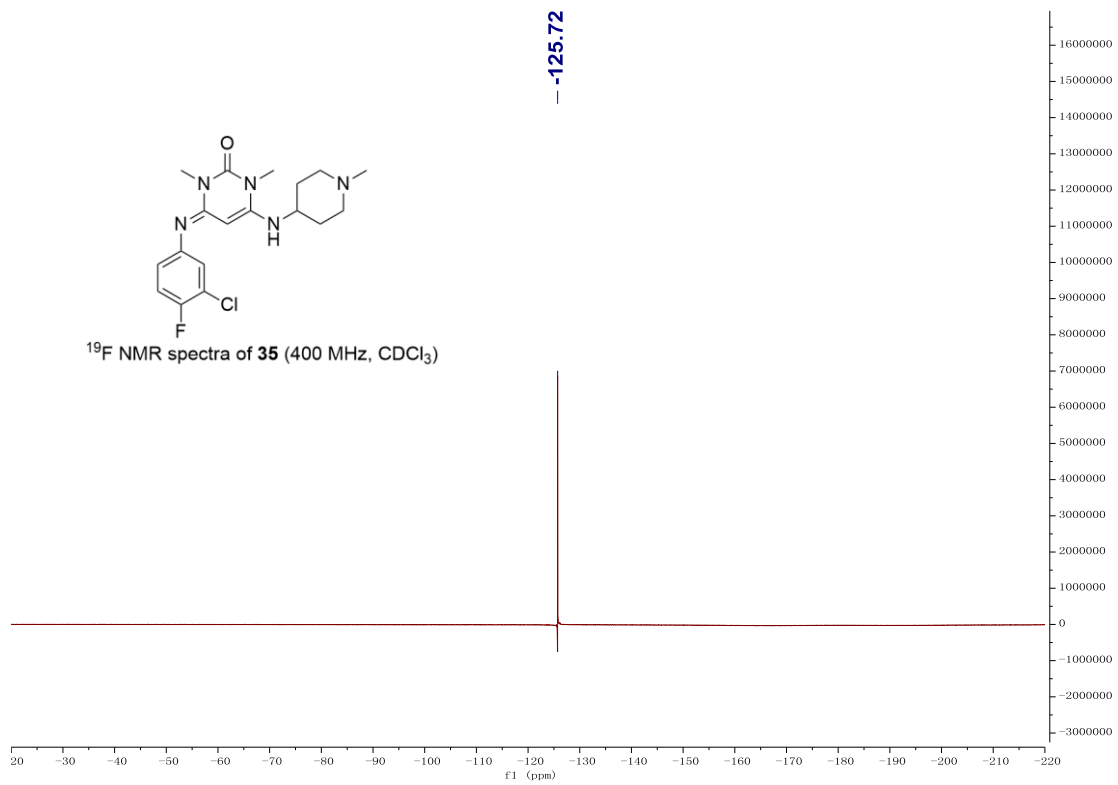

74

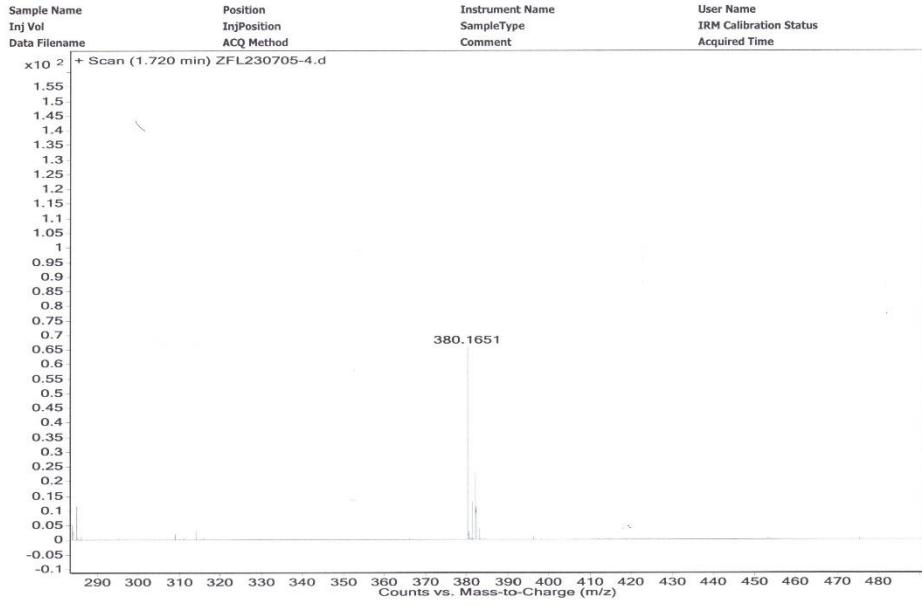

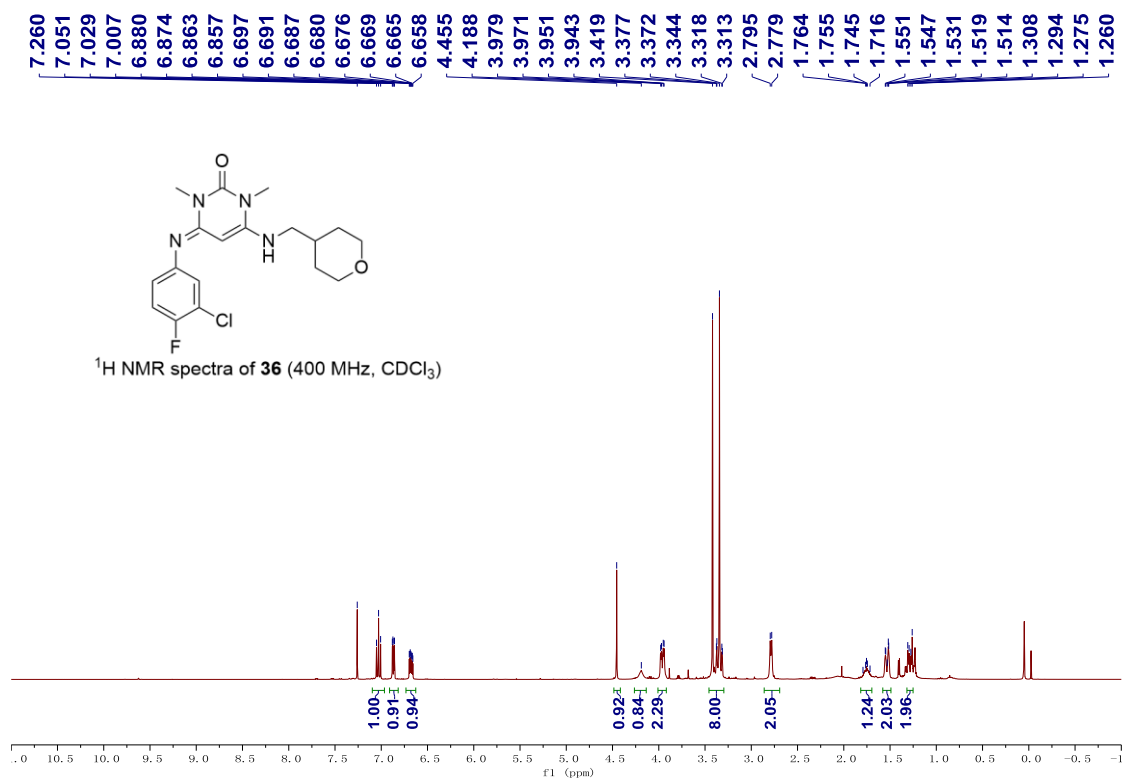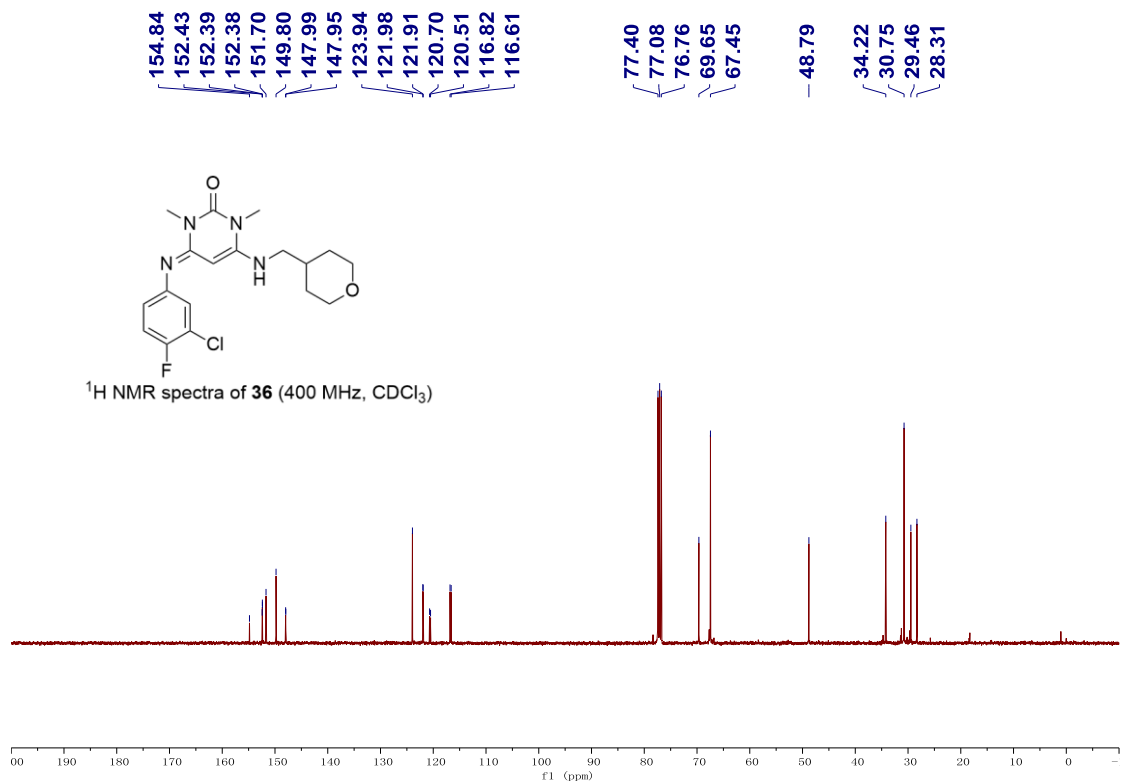



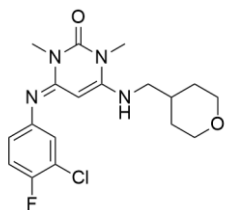

<sup>19</sup>F NMR spectra of **36** (400 MHz, CDCl<sub>3</sub>)

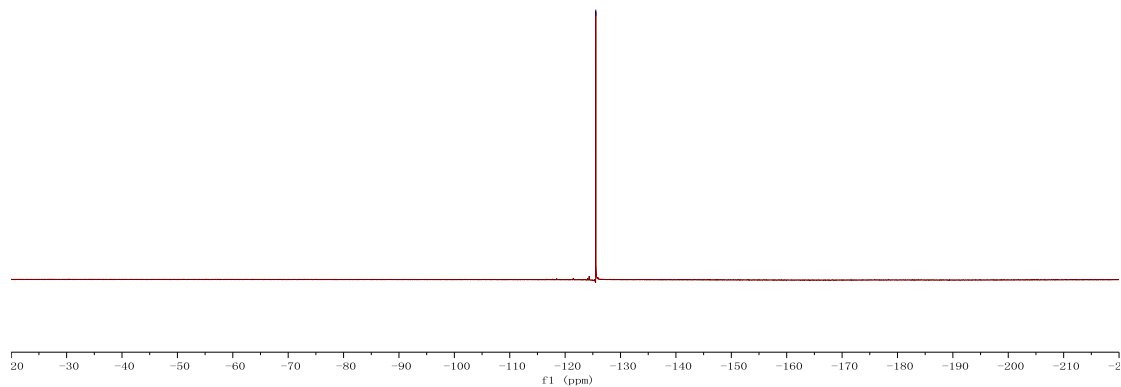

29.

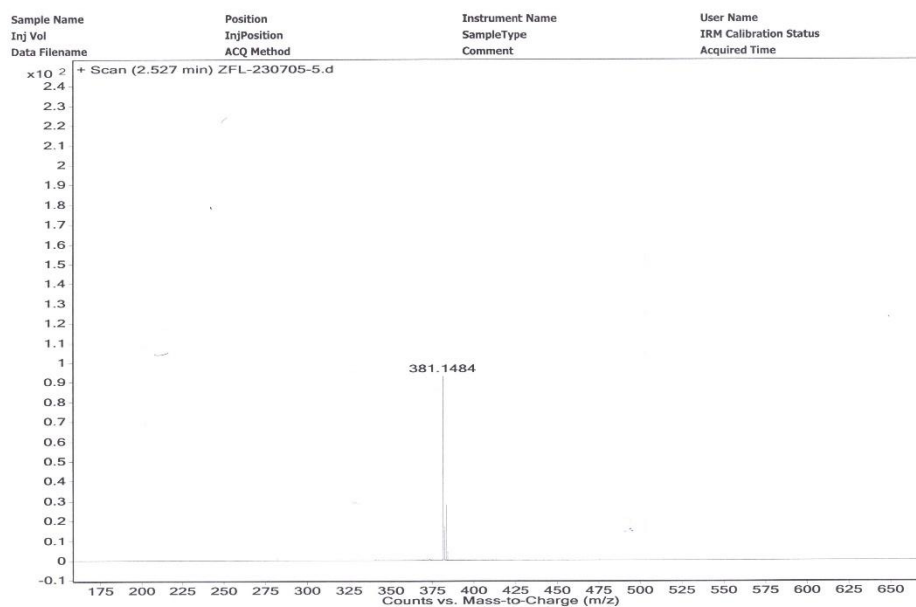

Supplement: d4md00730a1.pdf [file d4md00730a1.pdf]
